# Supplementary material
Source: PubMed Central journal article supplement (PMC9842595)
Supplement: 467_2022_5739_MOESM1_ESM.pdf [file 467_2022_5739_MOESM1_ESM.pdf]

# **IPNA Clinical Practice Recommendations for the Diagnosis and Management of Children with Steroid Sensitive Nephrotic Syndrome**

on behalf of the International Pediatric Nephrology Association

## **SUPPLEMENTARY MATERIAL:**

### **CONTENT:**

**Table S1** Area or expertise and responsibilities of core group members

**Table S2** Keywords for SSNS used for literature search in PubMed database

**Table S3** Randomized controlled trials (RCTs) evaluating PDN therapy in SSNS

**Table S3.1** Duration of PDN therapy for first episode of SSNS:  $\geq 3$  months vs. 2 months

**Table S3.2** Duration of PDN in the first episode of SSNS: Five to 7 months vs. 3 months

**Table S3.3** Other relevant regimens of PDN used in SSNS

**Table S4** Adverse effects of corticosteroids in children with SSNS

**Table S5** Studies evaluating daily PDN to prevent relapse with upper respiratory tract infection (URTI)

**Table S5.1/ Figure S1** Number of children with relapse associated with URTI: low dose daily PDN given at the onset of URTI compared with placebo

**Table S5.2/ Figure S2** Number of infection-related relapses per patient per year

**Table S5.3/ Figure S3** The mean number of relapses/patient during two year follow up

**Table S6** GRADE-based evidence for the different steroid-sparing agents used in children with FRNS/SDNS

**Table S7** SSNS Randomized controlled trials – Steroid-sparing and immunomodulatory agents in FRNS and SDNS

**Table S7.1** Outcome/ Relapses

**Table S7.2** Adverse Events

**Table S8** SSNS observational studies – Steroid-sparing and immunomodulatory agents in FRNS and SDNS

**Table S8.1** Calcineurin-Inhibitors (CNI): Cyclosporin A (CsA) and Tacrolimus (TAC)

**Table S8.2** Alkylating Agents: Cyclophosphamide (CPA) and Chlorambucil (CHL)

**Table S8.3** Mycophenolate mofetil (MMF)/ Mycophenolate Sodium (MPS)

**Table S8.4** Levamisol (LEV)

**Table S8.5** Rituximab (RTX)

**Table S8.6** Mizoribine (MZR)

**Table S8.7** Other Agents (Vincristine, Saquinavir, ACTH, Azathioprine)

**Table S9** Adverse effects and impact of alkylating agents on (peri)-pubertal children

**Table S10** Studies of long-term outcome of childhood-onset SSNS

**Table S11** Semiquantitative expression of typical dipstick results

**Table S12** Future research recommendations

**Table S13** Competencies expected in a young adult at the time of transition

**Table S14** The Transition scale, a tool to monitor the progression in transition competence

**Table S15** Definition differences between children and adults

**Alternatives to dipstick:** Unfortunately, this file includes a video and is therefore too large to be inserted in this word doc but will be available for the reader on the Springer website.

**Table S1: Area or expertise and responsibilities of core group members**

| <b>Name</b>           | <b>Area of expertise</b>                      | <b>Responsibilities</b>                                                                                                                                                                                                                                                              |
|-----------------------|-----------------------------------------------|--------------------------------------------------------------------------------------------------------------------------------------------------------------------------------------------------------------------------------------------------------------------------------------|
| Al Hasan, Khalid      | Pediatric nephrology                          | Drafting of recommendations and evidence text and grading of recommendations and reviewing the manuscript before submission                                                                                                                                                          |
| Bagga, Arvind         | Pediatric nephrology<br>Guideline development | Drafting of recommendations and evidence text and grading of recommendations and reviewing the manuscript before submission                                                                                                                                                          |
| Banerjee, Sushmita    | Pediatric nephrology                          | Drafting of recommendations and evidence text and grading of recommendations and reviewing the manuscript before submission                                                                                                                                                          |
| Bhimma, Rajendra      | Pediatric nephrology                          | Drafting of recommendations and evidence text and grading of recommendations and reviewing the manuscript before submission                                                                                                                                                          |
| Bonilla-Felix, Melvin | Pediatric nephrology                          | Drafting of recommendations and evidence text and grading of recommendations and reviewing the manuscript before submission                                                                                                                                                          |
| Boyer, Olivia         | Pediatric nephrology<br>Guideline development | Co-coordinator of this project. Drafting of recommendations and evidence text and grading of recommendations. Incorporation of suggestions from the core group members, external experts and voting group members into the manuscript and reviewing the manuscript before submission |
| Cano, Francisco       | Pediatric nephrology<br>Guideline development | Drafting of recommendations and evidence text and grading of recommendations and reviewing the manuscript before submission                                                                                                                                                          |
| Christian, Martin     | Pediatric nephrology                          | Drafting of recommendations and evidence text and grading of recommendations and reviewing the manuscript before submission                                                                                                                                                          |
| Cook, Wendy           | Patient representative                        | Drafting of recommendations and evidence text and grading of recommendations and reviewing the manuscript before submission                                                                                                                                                          |

| Name              | Area of expertise                                             | Responsibilities                                                                                                                                                                                                                                                                                                                                                      |
|-------------------|---------------------------------------------------------------|-----------------------------------------------------------------------------------------------------------------------------------------------------------------------------------------------------------------------------------------------------------------------------------------------------------------------------------------------------------------------|
| Gipson, Debbie    | Pediatric nephrology<br>Guideline development                 | Drafting of recommendations and evidence text and grading of recommendations and reviewing the manuscript before submission                                                                                                                                                                                                                                           |
| Hahn, Deirdre     | Pediatric nephrology                                          | Drafting of recommendations and evidence text and grading of recommendations and reviewing the manuscript before submission.                                                                                                                                                                                                                                          |
| Haffner, Dieter   | Pediatric nephrology<br>Guideline development                 | Leading coordinator of this project. Coordination of work groups and the process of generating the manuscript. Drafting of recommendations and evidence text and grading of recommendations, incorporation of suggestions from the core group members, external experts and voting group members into the manuscript and reviewing the manuscript before submission   |
| Hodson, Elisabeth | Pediatric nephrology<br>Guideline development<br>Epidemiology | Literature search and creation of evidence tables and meta-analysis. Drafting of recommendations and evidence text and grading of recommendations. Incorporation of suggestions from the core group members, external experts and voting group members into the manuscript and reviewing the manuscript before submission. Liaison to Cochrane Kidney and Transplant. |
| Kang, Hee Gyung   | Pediatric Nephrology                                          | Drafting of recommendations and evidence text and grading of recommendations and reviewing the manuscript before submission                                                                                                                                                                                                                                           |
| Nakanishi, Koichi | Pediatric nephrology<br>Guideline development                 | Drafting of recommendations and evidence text and grading of recommendations and reviewing the manuscript before submission                                                                                                                                                                                                                                           |
| Safouh, Hesham    | Pediatric nephrology<br>Guideline development                 | Drafting of recommendations and evidence text and grading of recommendations and reviewing the manuscript before submission                                                                                                                                                                                                                                           |

| Name              | Area of expertise                                             | Responsibilities                                                                                                                                                                                                                                                                                                                        |
|-------------------|---------------------------------------------------------------|-----------------------------------------------------------------------------------------------------------------------------------------------------------------------------------------------------------------------------------------------------------------------------------------------------------------------------------------|
| Samuel, Susan     | Pediatric nephrology<br>Guideline development<br>Epidemiology | Drafting of recommendations and evidence text and grading of recommendations and reviewing the manuscript before submission. Creation of evidence tables                                                                                                                                                                                |
| Trachtman, Howard | Pediatric nephrology                                          | Drafting of recommendations and evidence text and grading of recommendations and reviewing the manuscript before submission                                                                                                                                                                                                             |
| Trautmann, Agnes  | Pediatric nephrology<br>Guideline development<br>Epidemiology | Literature search and creation of evidence tables, drafting of recommendations and evidence text and grading of recommendations. Organization of Delphi process. Incorporation of suggestions from the core group members, external experts and voting group members into the manuscript and reviewing the manuscript before submission |
| Vivarelli, Marina | Pediatric nephrology<br>Guideline development                 | Drafting of recommendations and evidence text and grading of recommendations. Incorporation of suggestions from the core group members, external experts and voting group members into the manuscript and reviewing the manuscript before submission. Creation of evidence tables                                                       |
| Wetzels, Jack     | Adult nephrology<br>Transition<br>Guideline development       | Drafting of recommendations and evidence text and grading of recommendations and reviewing the manuscript before submission                                                                                                                                                                                                             |
| Xu, Hong          | Pediatric nephrology<br>Guideline development                 | Drafting of recommendations and evidence text and grading of recommendations and reviewing the manuscript before submission                                                                                                                                                                                                             |

**Table S2: Keywords for SSNS**

|                                                                                                                 |                                                                                                                                                                                                                                                                                                                               |
|-----------------------------------------------------------------------------------------------------------------|-------------------------------------------------------------------------------------------------------------------------------------------------------------------------------------------------------------------------------------------------------------------------------------------------------------------------------|
| Nephrotic syndrome                                                                                              | Nephrotic syndrome (NS)<br>Idiopathic nephrotic syndrome (iNS)<br>Primary SSNS<br>Secondary forms of nephrotic syndrome (systemic disease...)                                                                                                                                                                                 |
| Steroid response                                                                                                | Steroid sensitive nephrotic syndrome (SSNS)<br>Steroid resistant nephrotic syndrome (SRNS)<br>Remission (complete/ partial)<br>Response to treatment (initial responder, initial non-responder, late responders)                                                                                                              |
| Relapse                                                                                                         | Relapse of nephrotic syndrome<br>Definition<br>Triggers of relapses                                                                                                                                                                                                                                                           |
| Disease courses                                                                                                 | Infrequent relapsing nephrotic syndrome<br>Frequent relapsing nephrotic syndrome (FRNS)<br>Steroid dependent nephrotic syndrome (SDNS)<br>Secondary steroid-resistant nephrotic syndrome                                                                                                                                      |
| Primary treatment/<br>Initial treatment                                                                         | Steroid regimens<br>Glucocorticoids<br>Corticosteroids<br>Prednisone<br>Prednisolone<br>Administration (orally/ IV)<br>Duration<br>Dosage<br>Frequency (daily/ alternate daily)<br>Mycophenolate mofetil (MMF)<br>Mycophenolic acid<br>Pulse steroids – IV methylprednisolone<br>Complications of treatment: Steroid toxicity |
| Treatment of relapses<br><br>Prevention of relapses                                                             | Glucocorticoids<br>Corticosteroids<br>Prednisone/ prednisolone<br>Low-dose alternate-day steroid regimes<br>Increase of steroids during intercurrent illnesses<br>Steroid-sparing agents                                                                                                                                      |
| Corticosteroid sparing<br>treatments in<br>FRNS/SDNS<br>("maintenance<br>treatment", prevention<br>of relapses) | Indications<br>Steroid-sparing agents<br>Non-corticosteroid treatment<br>MMF<br>Levamisole<br>Calcineurin-Inhibitors (CNI)<br>Cyclosporin A (CsA)<br>Tacrolimus (Tac)<br>Rituximab<br>Alkylating agents<br>Cyclophosphamide<br>Chlorambucil<br>Ofatumumab<br>Mizoribine<br>Azithromycin                                       |

|                                             |                                                                                                                                                                                                                                                                                                                                                                                                                                                                                                                                                           |
|---------------------------------------------|-----------------------------------------------------------------------------------------------------------------------------------------------------------------------------------------------------------------------------------------------------------------------------------------------------------------------------------------------------------------------------------------------------------------------------------------------------------------------------------------------------------------------------------------------------------|
|                                             | <p>ACTH<br/>Fusidic acid<br/>I.V. Immunoglobulins</p>                                                                                                                                                                                                                                                                                                                                                                                                                                                                                                     |
| Drug monitoring                             | <p>Side effects<br/>Pharmacokinetics<br/>MPA-AUC<br/>Trough levels<br/>Pharmacogenetics</p>                                                                                                                                                                                                                                                                                                                                                                                                                                                               |
| Clinical evaluation                         | <p>Edema<br/>Weight increase<br/>Skin<br/>Extra-renal symptoms<br/>Age at onset<br/>Trigger events (infection, insect bites, allergic episodes)</p>                                                                                                                                                                                                                                                                                                                                                                                                       |
| Etiology, pathophysiology                   | <p>Immune-mediated disease<br/>Immune dysregulation<br/>Dysfunction/ dysregulation of T-lymphocytes<br/>B-T cell cross-talk<br/>Switched memory B cells<br/>B cell subpopulations<br/>EBV<br/>IgM<br/><br/>Immunoglobulin<br/>Systemic circulating factor disease<br/>Circulating glomerular permeability factor<br/><br/>Trigger events (e.g. infections, allergic reactions)<br/><br/>Underlying glomerular pathology<br/><br/>Genetic risk<br/>Genetic locus on chromosome 6p<br/>SNP in HLA-DQA1<br/>HLA-DQB1<br/>Genome wide association studies</p> |
| Biopsy/ Histopathology                      | <p>Indications for biopsy<br/>Age<br/>Minimal change nephrotic syndrome (MCNS)/ minimal change disease/<br/>glomerulopathy<br/>IgA nephropathy<br/>FSGS<br/>Membranous nephropathy<br/>Membranoproliferative GN (MPGN)<br/>Mesangioproliferative GN (MesPGN)<br/>Systemic diseases (e.g. SLE)</p>                                                                                                                                                                                                                                                         |
| Complications of nephrotic syndrome - acute | <p>Hypoalbuminemia<br/>Edema<br/>Generalized edema, Anasarca<br/>Refractory edema<br/>Effusions (pleural, pericardial)<br/>Pulmonary edema<br/>Umbilical/ inguinal hernia<br/>Hypervolemia<br/>Elevated blood pressure<br/>Diarrhea<br/>Invagination</p>                                                                                                                                                                                                                                                                                                  |

|                                                                          |                                                                                                                                                                                                                                                                                                                                                                                                                                                                                                                                      |
|--------------------------------------------------------------------------|--------------------------------------------------------------------------------------------------------------------------------------------------------------------------------------------------------------------------------------------------------------------------------------------------------------------------------------------------------------------------------------------------------------------------------------------------------------------------------------------------------------------------------------|
|                                                                          | <p>Acute kidney injury (prerenal)<br/> Intravascular hypovolemia<br/> Hypotension<br/> Hypovolemic dysregulation/ shock<br/> Electrolyte imbalances<br/> Impaired glucose tolerance<br/> Hemoconcentration<br/> Hypercoagulability<br/> Thrombosis<br/> Infections<br/> Increased risks of infections (viral, bacterial)<br/> Peritonitis<br/> Cellulitis<br/> Septicemia<br/> Meningitis<br/> Pneumonia<br/> VZV<br/> Hyper-/dyslipidemia<br/> Anemia<br/> Vitamin D deficiency</p>                                                 |
| <p>Chronic complications of nephrotic syndrome and treatment-related</p> | <p>Steroid toxicity<br/> Immunosuppression<br/> Increased susceptibility to infection<br/> Hypogammaglobulinemia<br/> Osteopenia<br/> Ophthalmologic complications<br/> Cataract<br/> Glaucoma<br/> Growth impairment<br/> Excessive weight gain/ obesity<br/> Cushingoid features<br/> Diabetes mellitus<br/> Adrenal insufficiency<br/> Arterial hypertension<br/> Increased cardiovascular risk<br/> Behavior disturbances (hyperactivity, depression, psychosis)</p>                                                             |
| <p>Supportive and preventive management</p>                              | <p>Fluid restriction<br/> Salt restriction<br/> Fluid balancing<br/> Fluid management<br/> Underfill/ overfill hypothesis<br/> Diuretics<br/> Furosemide<br/> Thiazide diuretics<br/> Aldosterone antagonists<br/> Spironolactone<br/> Albumin infusion<br/> Evaluation of FENa (fractional excretion of sodium)<br/> Vitamin D supplementation<br/> Gastroprotection<br/> Electrolyte imbalances<br/> Hypocalcemia<br/> Antihypertensive treatment<br/> Calcium antagonists<br/> Amlodipine<br/> RAAS<br/> ACE-inhibitor (ACEi)</p> |

|            |                                                                                                                                                                                                                                                                                                                                                                                                                                                                                                                                                                     |
|------------|---------------------------------------------------------------------------------------------------------------------------------------------------------------------------------------------------------------------------------------------------------------------------------------------------------------------------------------------------------------------------------------------------------------------------------------------------------------------------------------------------------------------------------------------------------------------|
|            | <p>Angiotensin-receptor-blocker (ARB)</p> <p>Prophylactic anticoagulation<br/> Patient mobilization<br/> Avoidance of immobilization<br/> Heparin<br/> Aspirin</p> <p>Infection prophylaxis<br/> Antibiotic prophylaxis<br/> Penicillin<br/> Hypogammaglobulinemia<br/> Immunoglobulin substitution<br/> Vaccination<br/> VZV-IgG<br/> Aciclovir</p> <p>Hyperlipidemia<br/> Life-style</p> <p>School attendance</p> <p>Diet therapy<br/> Caloric intake<br/> Protein intake</p> <p>Exercise</p> <p>Evaluation of bone mineral density (BMD)<br/> Biphosphonates</p> |
| Outcome    | <p>Long-term outcome<br/> Renal function<br/> Renal survival</p> <p>Hospitalization</p> <p>Quality of life<br/> Patient-reported outcomes</p> <p>Malignancies</p>                                                                                                                                                                                                                                                                                                                                                                                                   |
| Transition | Transition                                                                                                                                                                                                                                                                                                                                                                                                                                                                                                                                                          |



**Table S3: Randomized controlled trials (RCTs) evaluating prednisone in SSNS**  
Based on: Hahn et al. [1]

**Table S3.1 Duration of prednisone (PDN) therapy for first episode of SSNS:  $\geq$  three months versus 2 months**

| Outcome                                           | N. studies | Total Participants | Intervention N events/N participants | Comparator N events/N participants | RR   | 95% CI      | I <sup>2</sup> |
|---------------------------------------------------|------------|--------------------|--------------------------------------|------------------------------------|------|-------------|----------------|
| <b>RELAPSE/ FRNS</b>                              |            |                    |                                      |                                    |      |             |                |
| N with FRNS at 12-24 mths                         | 8          | 976                | 186/469                              | 228/507                            | 0.86 | 0.71 - 1.06 | 33%            |
| N with relapse at 12-24 mths                      | 12         | 1309               | 346/648                              | 427/661                            | 0.77 | 0.63 - 0.95 | 77%            |
| <i>N with FRNS (low risk of bias)</i>             | 5          | 756                | 172/375                              | 183/381                            | 0.96 | 0.83 - 1.10 | 0%             |
| <i>N with FRNS (unclear or high risk of bias)</i> | 3          | 220                | 14/94                                | 45/126                             | 0.45 | 0.26 - 0.77 | 0%             |
| <b>ADVERSE EFFECTS</b>                            |            |                    |                                      |                                    |      |             |                |
| Psychological disorders                           | 4          | 456                | 98/237                               | 103/219                            | 1    | 0.53 - 1.90 | 26%            |
| Hypertension                                      | 7          | 548                | 25/268                               | 14/280                             | 1.78 | 0.55 - 5.73 | 50%            |
| Eye complications                                 | 6          | 623                | 3/307                                | 10/316                             | 0.41 | 0.11 - 1.52 | 0%             |
| Short stature                                     | 4          | 354                | 9/176                                | 20/178                             | 0.54 | 0.25 - 1.18 | 0%             |
| Cushingoid features                               | 5          | 547                | 124/288                              | 104/259                            | 1.12 | 0.76 - 1.65 | 46%            |
| Infections                                        | 2          | 172                | 33/101                               | 29/71                              | 0.79 | 0.53 - 1.17 | 0%             |
| Osteoporosis                                      | 3          | 233                | 1/123                                | 5/110                              | 0.47 | 0.06 - 3.36 | 0%             |

RR, Relative risk, 95% CI, 95% confidence intervals, I<sup>2</sup>, measure of heterogeneity between studies (< 40%, not important, 30-60% moderate, >60% substantial). The section in italics demonstrates the difference in results between studies at low risk of bias for selection bias and those at unclear or high risk of bias

**Table S3.2 Duration of PDN in the first episode of SSNS: Five to seven months versus three months**

| Outcome                                           | N. studies | Total Participants | Intervention N events/N participants | Comparator N events/N participants | RR   | 95% CI      | I <sup>2</sup> |
|---------------------------------------------------|------------|--------------------|--------------------------------------|------------------------------------|------|-------------|----------------|
| <b>RELAPSE/FRNS</b>                               |            |                    |                                      |                                    |      |             |                |
| N with FRNS at 12-24 mths                         | 6          | 706                | 109/357                              | 135/349                            | 0.73 | 0.49 – 1.09 | 68%            |
| N with relapse at 12-24 mths                      | 7          | 762                | 182/387                              | 261/375                            | 0.62 | 0.45 – 0.85 | 83%            |
| <i>N with FRNS (low risk of bias)</i>             | 3          | 376                | 84/192                               | 81/184                             | 0.99 | 0.74 – 1.33 | 35%            |
| <i>N with FRNS (unclear or high risk of bias)</i> | 3          | 330                | 25/165                               | 54/165                             | 0.48 | 0.32 – 0.72 | 0%             |
| <b>ADVERSE EFFECTS</b>                            |            |                    |                                      |                                    |      |             |                |
| Psychological disorders                           | 4          | 505                | 4/258                                | 13/247                             | 0.30 | 0.05 – 1.83 | 46%            |
| Hypertension                                      | 6          | 752                | 53/380                               | 47/372                             | 1.11 | 0.71 – 1.74 | 27%            |
| Eye complications                                 | 5          | 614                | 5/308                                | 11/306                             | 0.46 | 0.18 – 1.17 | 0%             |
| Short stature                                     | 3          | 436                | 24/222                               | 32/214                             | 0.73 | 0.36 – 1.48 | 40%            |
| Cushingoid features                               | 6          | 762                | 131/386                              | 141/376                            | 0.86 | 0.60 – 1.23 | 70%            |
| Infections                                        | 5          | 702                | 64/356                               | 64/346                             | 0.98 | 0.65 – 1.46 | 33%            |

RR, Relative risk, 95% CI, 95% confidence intervals, I<sup>2</sup>, measure of heterogeneity between studies (< 40%, not important; 30-60% moderate; >60% substantial). The section in italics demonstrates the difference in results between studies at low risk of bias for selection bias and those at unclear or high risk of bias

**Table S3.3 Other relevant regimens of PDN used in SSNS**

| Study                                                                                                | Population                               | Intervention<br>Steroids   | Comparator                       | Outcome                                                                          | N.<br>studies | Total<br>participants | RR/MD                                              | 95% CI             | Conclusions                                                                                                                    |
|------------------------------------------------------------------------------------------------------|------------------------------------------|----------------------------|----------------------------------|----------------------------------------------------------------------------------|---------------|-----------------------|----------------------------------------------------|--------------------|--------------------------------------------------------------------------------------------------------------------------------|
| APN 1988 [2]                                                                                         | SSNS<br>1 <sup>st</sup> episode          | Two months                 | One month                        | N. with<br>relapse at<br>12-24 mths                                              | 1             | 61                    | RR 1.46                                            | 1.01 – 2.12        | Two months more<br>effective than one<br>month                                                                                 |
| Ekka 1997 [3]<br>Li 1994 [4]                                                                         | SSNS<br><b>relapse</b>                   | Single daily<br>dose       | Divided daily<br>doses           | Days to<br>remission                                                             | 2             | 138                   | MD 0.04                                            | -0.98 to<br>+1.06  | Single daily dose as<br>effective as divided<br>doses                                                                          |
| Borovitz 2020 [5]<br>Sheikh 2019 [6]                                                                 | SSNS<br><b>relapse</b>                   | Reduced<br>dose<br>1 mg/kg | Standard<br>dose<br>2 mg/kg      | Days to<br>remission                                                             | 2             | 79                    | MD 0.71                                            | -0.43 to +<br>1.86 | Reduced dose as<br>effective as standard<br>2 mg/kg dose (small<br>studies)                                                    |
| Borovitz 2020 [5]<br>Kansal 2019 [7]                                                                 | SSNS<br><b>relapse</b>                   | Reduced<br>dose            | Standard<br>dose                 | N. with<br>relapse                                                               | 2             | 59                    | RR 0.66                                            | 0.16 – 2.68        | Reduced dose as<br>effective as standard<br>dose (small studies)                                                               |
| Yadav 2019 [8]                                                                                       | SSNS<br>FRNS                             | Daily dose                 | Alternate day<br>dose            | Number of<br>relapses/yea<br>r                                                   | 1             | 62                    | MD -<br>0.90                                       | -1.33 to -<br>0.47 | Daily dose more<br>effective than<br>alternate day dose                                                                        |
| Raman 2016 [9]<br>Basu 2020 [10]                                                                     | SSNS<br><b>Initial &amp;<br/>relapse</b> | Dose in<br>mg/kg           | Dose in<br>mg/1.73m <sup>2</sup> | Relapse at 6<br>mths                                                             | 2             | 146                   | RR 1.03                                            | 0.71 to 1.49       | No difference<br>between regimens in<br>relapse or adverse<br>effects                                                          |
| Abeygunawardena<br>2008 [11]<br>Abeygunawardena<br>2014 [11]<br>Gulati 2011 [12]<br>Mattoo 2000 [13] | SSNS<br><b>relapsing<br/>with URТИ</b>   | Daily dose<br>during URТИ  | Alternate day<br>dose in URТИ    | Number with<br>relapse                                                           | 4             | 219                   | Different<br>analyse<br>s used<br>in each<br>study |                    | Reduced risk of<br>relapse with daily<br>doses of prednisone<br>compared with<br>alternate day<br>prednisone in all<br>studies |
| PREDNOS 2 2021<br>[14]                                                                               | SSNS<br><b>relapsing<br/>with URТИ</b>   | Daily dose<br>during URТИ  | Placebo                          | 1 <sup>st</sup> URТИ-<br>related<br>relapse;<br>number of<br>overall<br>relapses | 1             | 365                   | RD,<br>-0.024                                      | -0.142 to<br>0.095 | No reduction of the<br>risk of URТИ-related<br>relapse with daily<br>doses of prednisone                                       |

|                                         |                 |                                                                                                                            |                                                                                                                                       |                                              |   |     |         |                       |                                                                                                                                                                                                                                                                                                                                                           |
|-----------------------------------------|-----------------|----------------------------------------------------------------------------------------------------------------------------|---------------------------------------------------------------------------------------------------------------------------------------|----------------------------------------------|---|-----|---------|-----------------------|-----------------------------------------------------------------------------------------------------------------------------------------------------------------------------------------------------------------------------------------------------------------------------------------------------------------------------------------------------------|
| PROPINE Study 2020 (Gargiulo 2020) [15] | SSNS in relapse | From day 5 after remission of relapse: Stable dose (40 mg/m <sup>2</sup> ) given on 18 alternate days over 36 days. (N=38) | From day 5 after remission of relapse: Tapering dose over 72 days. Taper after each group of 6 doses of alternate day steroid. (N=40) | Number with relapse at 6 months              | 1 | 78  | RR 0.73 | 0.46 to 1.16          | No difference in risk of relapse between stable dose of alternate day prednisone (40 mg/m <sup>2</sup> ) for 36 days (relapse rate 42%) and tapering dose over 72 days (relapse rate 58%) with same cumulative total prednisone dose                                                                                                                      |
| Kainth 2021 [16]                        | SSNS in relapse | After achieving remission of a relapse: "Short regimen" (40 mg/m <sup>2</sup> on alternate days for 2 weeks) (N=55)        | After achieving remission of a relapse: "Standard regimen" (40 mg/m <sup>2</sup> on alternate days for 4 weeks) (N=62)                | % of children with FRNS or SDNS at 12 months | 1 | 117 | HR 1.01 | 0.83 to 1.23 (p=0.98) | No difference in % of children developing FRNS or SDNS at 12 months between "short regimen" and "standard regimen" (23% vs. 24%, risk difference -1%, 95% CI -15% to 16%, p=0.9). Similar in both groups: time to relapse, relapse rate, steroid-related adverse events at 12 months. Cumulative steroid exposure significantly lower in "short regimen". |

RR, Relative risk, 95% CI, 95% confidence intervals. MD, mean difference. RD, risk difference

**Table S4 Adverse effects of corticosteroids in children with SSNS**

Adverse effects of corticosteroids were recorded up to 12-24 months following PDN treatment for the first episode of SSNS. The duration of initial treatment in the high dose group ranged from three to seven months. The duration of initial treatment in the lower dose group ranged from two to three months. The data were obtained from randomised controlled trials published between 1993 and 2020 with outcomes reported at 12-24 months after initiation of treatment. Data from [1].

| <b>Adverse effects</b>     | <b>No. of trials</b> | <b>No. of . patients</b> | <b>% harm in high dose group</b> | <b>% harm in lower dose group</b> | <b>Risk difference (95% confidence intervals)</b> |
|----------------------------|----------------------|--------------------------|----------------------------------|-----------------------------------|---------------------------------------------------|
| Hypertension               | 14                   | 1475                     | 12.6                             | 9.5                               | 0.03 (-0.01 to 0.07)                              |
| Ophthalmological disorders | 11                   | 1237                     | 1.3                              | 3.4                               | 0.00 (-0.02 to 0.01)                              |
| Growth retardation         | 7                    | 790                      | 8.3                              | 3.2                               | -0.03 (-0.06 to 0.02)                             |
| Psychological disorders    | 8                    | 962                      | 20.6                             | 24.9                              | -0.03 (-0.07 to 0.01)                             |
| Cushingoid appearance      | 11                   | 1309                     | 40.9                             | 38.6                              | 0.01 (-0.07 to 0.10)                              |
| Infections                 | 7                    | 874                      | 21.2                             | 22.3                              | -0.02 (-0.08 to 0.04)                             |
| Osteoporosis               | 3                    | 233                      | 0.81                             | 4.5                               | -0.02 (-0.09 to 0.05)                             |

**Table S5 Studies evaluating daily PDN to prevent relapse with upper respiratory tract infection (URTI)**

Five RCTs evaluated whether low dose daily PDN given for 5-7 days at the onset of URTI reduced the risk of relapse in children with SSNS. Studies presented their data in different formats limiting the opportunities for combining data in meta-analyses.

**Table S5.1/ Figure S1:** Number of children with relapse associated with URTI: low dose daily PDN given at the onset of URTI compared with placebo.

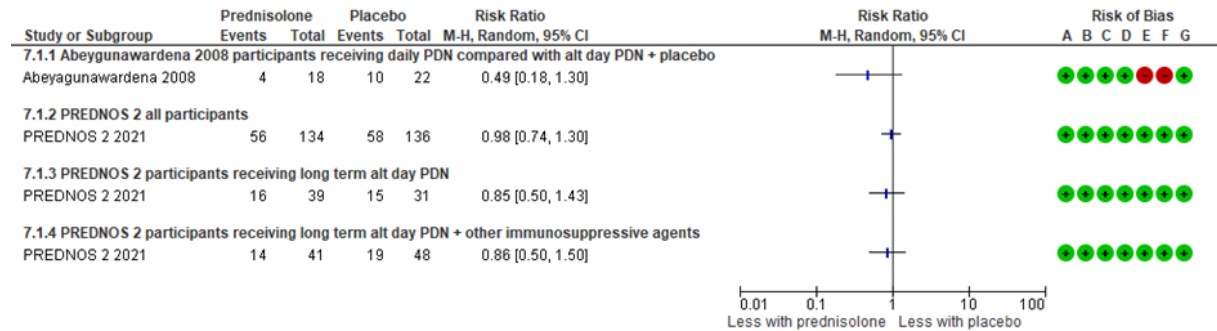

Risk of bias legend

- (A) Random sequence generation (selection bias)
- (B) Allocation concealment (selection bias)
- (C) Blinding of participants and personnel (performance bias)
- (D) Blinding of outcome assessment (detection bias)
- (E) Incomplete outcome data (attrition bias)
- (F) Selective reporting (reporting bias)
- (G) Other bias

**Figure S1** shows a forest plot of the number of children with SSNS and with URTI-related relapses in those receiving low-dose daily PDN for 5-7 days compared with those receiving placebo using data from two RCTs (15 mg per m<sup>2</sup> BSA which is equivalent to 0.5 mg/kg in PREDNOS 2, and 0.36 mg/kg for Abeygunawardena 2008) [11, 14]. The data indicate that daily low-dose PDN did not reduce the risk of relapse with URTI in children with SSNS since the 95% confidence for each point estimate cross 1. The risk of bias attributes are listed below the forest plot and are shown to the left of the figure with green indicating low risk of bias and red indicating high risk of bias. PREDNOS 2 [14] is at low risk of bias for all attributes while Abeygunawardena 2008 [11] is at high risk of bias for incomplete outcome data and selective reporting of outcomes. Abeygunawardena 2008 [11] was also inadequately powered to demonstrate a difference between interventions as shown by the wide confidence intervals around the point estimate (relative risk 0.49, 95% confidence intervals 0.18 to 1.30).

**Table S5.2/ Figure S2:** Number of infection-related relapses per patient per year

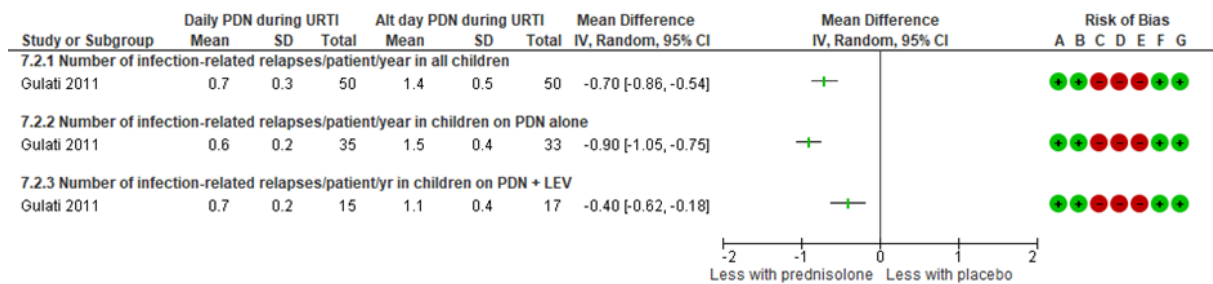

Risk of bias legend

- (A) Random sequence generation (selection bias)
- (B) Allocation concealment (selection bias)
- (C) Blinding of participants and personnel (performance bias)
- (D) Blinding of outcome assessment (detection bias)
- (E) Incomplete outcome data (attrition bias)
- (F) Selective reporting (reporting bias)
- (G) Other bias

**Figure S2** shows a forest plot of a single RCT [12], which evaluated the number of infection related relapses/patient/year in children given low dose daily PDN (0.6 mg/kg) for 7 days at the onset of infection compared with those continuing on alternate day PDN. In the experimental group, participants had their existing PDN alternate-day dose increased to a daily dose for 7 days at onset of viral infection. In all children and in subgroups, receiving PDN alone or PDN and levamisole, the number of infection related relapses/patient/year were reduced in children receiving daily PDN. The study was at high risk of bias for lack of blinding of participants, personnel and outcome assessment and for incomplete reporting of outcome data.

**Table S5.3/ Figure S3:** The mean number of relapses/patient during two year follow up

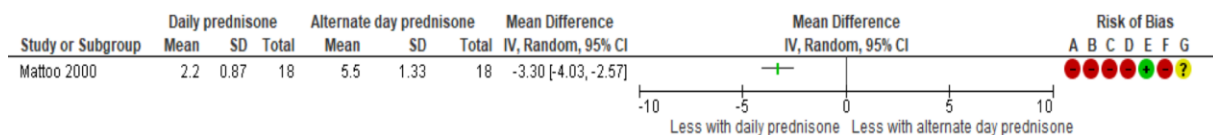

Risk of bias legend

- (A) Random sequence generation (selection bias)
- (B) Allocation concealment (selection bias)
- (C) Blinding of participants and personnel (performance bias)
- (D) Blinding of outcome assessment (detection bias)
- (E) Incomplete outcome data (attrition bias)
- (F) Selective reporting (reporting bias)
- (G) Other bias

**Figure S3** shows a single small RCT (n=36) [13] comparing low dose daily PDN (0.5 mg/kg) for 5 days at the onset of URTI with continuing alternate day PDN (0.5 mg/kg). It reported data on the mean number of relapses/patient during the 2 year follow up and did not separate relapses due to URTI from other relapses. Low dose daily PDN reduced the risk of relapse compared with continuing alternate day PDN. The study was at high risk of selection, performance and detection bias.

A fifth study [17] reported data from a cross-over study. Twenty seven children not receiving alternate day PDN were randomised to receive low-dose daily PDN (0.5 mg/kg) for 5 days at the onset of each URTI during 12 months while 21 children not receiving alternate day PDN were randomised to receive placebo for 5 days at the onset of each URTI for 12 months. At the end of 12 months, children continuing in the study crossed over to alternate treatment regimen and were followed for a further 12 months. The data could not be included in a

meta-analysis as the data were not provided separately for participants in the first and second parts of the cross over study. Thirty three children completed the two year study. In the PDN arm, 115 episodes of URTI were associated with 11 relapses (9.5%). In the placebo arm, 101 episodes of URTI were associated with 25 relapses (24.7%). This study was at high risk of attrition and reporting bias.

### **Conclusions**

One study [14] concluded that there was no evidence that a short course of low dose daily PDN in children with URTI compared with placebo prevents relapse of SSNS. This study was adequately powered and at low risk of bias for all risk of bias attributes. However in the subgroup analyses, confidence intervals were wide reflecting the small numbers of participants in each subgroup.

Four studies [11-13, 17] concluded that a short course of low dose daily PDN compared with alternate day PDN or no PDN in children with URTI reduces the risk of relapse in SSNS. These studies were all at a high risk of bias for two or more study attributes as well as being at risk of imprecision because of small numbers of participants in each group.

Studies at increased risk of bias are more likely to show a benefit of treatment [18, 19]. However small numbers of participants in subgroups in the PREDNOS 2 and small numbers in the other studies result in imprecision. Therefore there is insufficient evidence to recommend routine use of low dose daily PDN for URTI-associated relapse prevention. However, such an approach may be considered in children already taking low dose alternate day PDN where there is a history of repeated infection-associated relapses.



**Table S6: GRADE-based evidence for the different steroid-sparing agents used in children with FRNS/SDNS**

Data from [20].

**Rituximab compared with prednisone or placebo with/without calcineurin inhibitors in relapsing SSNS**

| Outcome                    | Study design:<br>N (Total participants)          | Findings and direction of effect                                                                                                                                                                                                        | Strength of evidence (GRADE)                   | Conclusion                                                                                     |
|----------------------------|--------------------------------------------------|-----------------------------------------------------------------------------------------------------------------------------------------------------------------------------------------------------------------------------------------|------------------------------------------------|------------------------------------------------------------------------------------------------|
| <b>Major outcomes</b>      |                                                  |                                                                                                                                                                                                                                         |                                                |                                                                                                |
| N with relapse at 3 months | RCT: 3 (132)<br>SDNS: 3 RCTs                     | Three RCTs with 132 participants with consistent and precise information on outcome.<br><br>RR for relapse at three months is 0.32 [95% CI 0.14, 0.70]<br><br>Absolute number with relapse: placebo 580 per 1000; RTX 170 per 1000.     | Moderate (evidence downgraded for imprecision) | Risk of relapse is probably reduced by RTX compared with prednisone/placebo with/without CNIs. |
| N with relapse at 6 months | RCT: 6 (302)<br>SDNS: 5 RCTs<br>FRNS/SDNS: 1 RCT | Six RCTs with 302 participants with consistent and precise information on outcome.<br><br>RR for relapse at six months is 0.19 [95% CI 0.09, 0.39].<br><br>Absolute numbers with relapse: placebo 548 per 1000; rituximab 126 per 1000. | Moderate (evidence downgraded for imprecision) | Risk of relapse is probably reduced by RTX compared with PDN/placebo with/without CNIs.        |

|                             |                                                  |                                                                                                                                                                                                                                                                         |                                                |                                                                                                   |
|-----------------------------|--------------------------------------------------|-------------------------------------------------------------------------------------------------------------------------------------------------------------------------------------------------------------------------------------------------------------------------|------------------------------------------------|---------------------------------------------------------------------------------------------------|
| N with relapse at 12 months | RCT: 4 (228)<br>SDNS: 3 RCTs<br>FRNS/SDNS: 1 RCT | Four RCTs with 228 participants with consistent but imprecise information on outcome, with heterogeneity between studies.<br><br>RR for relapse at 12 months is 0.50 [95% CI 0.28, 0.89].<br><br>Absolute numbers with relapse: placebo 606 per 1000; RTX 382 per 1000. | Moderate (evidence downgraded for imprecision) | Risk of relapse is probably reduced by RTX compared with PDN/placebo with/without CNIs.           |
| <b>Adverse outcome</b>      |                                                  |                                                                                                                                                                                                                                                                         |                                                |                                                                                                   |
| Infusion reactions          | RCT: 4 (252)                                     | Four RCTs with 252 participants with consistent but imprecise information on outcome.<br><br>RR for infusion reactions during studies was 5.83 [95% CI 1.34, 25.29].<br><br>Absolute number with reactions: placebo 8 per 1000; RTX 46 per 1000.                        | Low (evidence downgraded for imprecision)      | Risk of infusion reactions may be increased with RTX compared with PDN/placebo with/without CNIs. |

|                   |              |                                                                                                                                                                                                                                   |                                           |                                                                                                  |
|-------------------|--------------|-----------------------------------------------------------------------------------------------------------------------------------------------------------------------------------------------------------------------------------|-------------------------------------------|--------------------------------------------------------------------------------------------------|
| Severe infections | RCT: 3 (222) | Three RCTs with 222 participants with consistent but imprecise information on outcome.<br><br>RR for severe infection is 0.90 [95% CI 0.26, 3.15]<br><br>Absolute number with infections: Placebo 180 per 1000; RTX 162 per 1000. | Low (evidence downgraded for imprecision) | Risk of severe infections may be increased with RTX compared with PDN/placebo with/without CNIs. |
| Arthropathy       | RCT: 2 (84)  | Two RCTs with 84 participants with consistent but imprecise information on outcome.<br><br>RR for arthropathy is 3.92 [95% CI 0.45, 33.98].<br><br>Absolute numbers with arthropathy: placebo 12 per 1000; RTX 47 per 1000.       | Low (evidence downgraded for imprecision) | Risk of arthropathy may be increased with RTX compared with PDN/placebo with/without CNIs.       |

GRADE: Grading of Recommendations Assessment, Development and Evaluation used to assess certainty (or quality) of the body of evidence

RR = relative risk; 95% CI = 95% confidence intervals

### MMF compared with calcineurin inhibitors (cyclosporin, tacrolimus) in relapsing SSNS

| Outcome               | Study design: N (Total participants) | Findings & direction of effect | Strength of evidence (GRADE) | Conclusion |
|-----------------------|--------------------------------------|--------------------------------|------------------------------|------------|
| <b>Major outcomes</b> |                                      |                                |                              |            |

|                           |                                   |                                                                                                                                                                                                                                                |                                                                        |                                                                           |
|---------------------------|-----------------------------------|------------------------------------------------------------------------------------------------------------------------------------------------------------------------------------------------------------------------------------------------|------------------------------------------------------------------------|---------------------------------------------------------------------------|
| Relapse by 12 months      | RCT: 2 (82)<br>FRNS/SDNS: 2 RCTs  | Two RCTs with 82 participants with consistent but imprecise information on outcome.<br><br>RR for relapse is 1.90 [95% CI 0.66, 5.46] when comparing MMF with CsA.<br><br>Absolute numbers with relapse: CsA 238 per 1,000; MMF 452 per 1,000. | Low (evidence downgraded for risk of bias issues and imprecision)      | Risk of relapse may not differ between MMF and CsA.                       |
| Relapse rate at 12 months | RCT: 3 (142)<br>FRNS/SDNS: 3 RCTs | Three RCTs with 142 participants with consistent but imprecise information on outcome.<br><br>Mean relapse rate/year 0.83 higher with MMF when compared to CsA (can be 0.33 higher to 1.33 higher).                                            | Low (evidence downgraded for risk of bias issues and imprecision)      | Relapse rate/year may be higher with MMF compared with CsA.               |
| <b>Other outcomes</b>     |                                   |                                                                                                                                                                                                                                                |                                                                        |                                                                           |
| GFR at 12 months          | RCT: 1 (14)                       | One RCT with 24 participants with imprecise effects on eGFR.<br><br>RR for reduced GFR is 0.33 [95% CI 0.01, 7.45] when comparing MMF with CsA.<br><br>Absolute number with reduced eGFR: cyclosporin 83 per 1000; MMF 28 per 1000.            | Very low (evidence downgraded for risk of bias issues and imprecision) | It is uncertain whether eGFR differs between treatments with MMF and CsA. |
| <b>Adverse effects</b>    |                                   |                                                                                                                                                                                                                                                |                                                                        |                                                                           |

|                |              |                                                                                                                                                                                                                                                                                                                   |                                                                             |                                                          |
|----------------|--------------|-------------------------------------------------------------------------------------------------------------------------------------------------------------------------------------------------------------------------------------------------------------------------------------------------------------------|-----------------------------------------------------------------------------|----------------------------------------------------------|
| Hypertension   | RCT: 3 (144) | <p>Three RCTs with 144 participants with consistent but imprecise information on outcome.</p> <p>RR for hypertension at 12 months is 0.30 [95% CI 0.09, 1.07] when comparing MMF with cyclosporin.</p> <p>Absolute number with hypertension: cyclosporin 292 per 1000; MMF 88 per 1000.</p>                       | Low (evidence downgraded for risk of bias issues and imprecision)           | Risk of hypertension may not differ between MMF and CsA. |
| Hypertrichosis | RCT: 3 (140) | <p>Three RCTs with 140 participants with consistent information on outcome showed increased risk of hypertrichosis.</p> <p>RR for hypertrichosis at 12 months is 0.23 [95% CI 0.10, 0.50] when comparing MMF with CsA.</p> <p>Absolute number with hypertrichosis: cyclosporin 426 per 1000; MMF 98 per 1000.</p> | Low (evidence downgraded for risk of bias issues and small patient numbers) | Number with hypertrichosis may be higher with CsA.       |

|                 |              |                                                                                                                                                                                                                                                                                                              |                                                                             |                                                     |
|-----------------|--------------|--------------------------------------------------------------------------------------------------------------------------------------------------------------------------------------------------------------------------------------------------------------------------------------------------------------|-----------------------------------------------------------------------------|-----------------------------------------------------|
| Gum hypertrophy | RCT: 3 (144) | <p>Three RCTs with 140 participants with consistent information on outcome showed increased risk of gum hypertrophy.</p> <p>RR for gum hypertrophy at 12 months is 0.09 [95% CI 0.02, 0.47] when comparing MMF with CyA.</p> <p>Absolute number with gum hypertrophy: CyA 208 per 1000; MMF 19 per 1000.</p> | Low (evidence downgraded for risk of bias issues and small patient numbers) | Number with gum hypertrophy may be higher with CsA. |
|-----------------|--------------|--------------------------------------------------------------------------------------------------------------------------------------------------------------------------------------------------------------------------------------------------------------------------------------------------------------|-----------------------------------------------------------------------------|-----------------------------------------------------|

GRADE: Grading of Recommendations Assessment, Development and Evaluation used to assess certainty (or quality) of the body of evidence

RR = relative risk; 95% CI = 95% confidence intervals

### MMF compared with levamisole in relapsing SSNS

| Outcome                            | Study design: N (Total Participants) | Findings & direction of effect                                                                                                                                                                                                                                                        | Strength of evidence (GRADE)                               | Conclusion                                                                  |
|------------------------------------|--------------------------------------|---------------------------------------------------------------------------------------------------------------------------------------------------------------------------------------------------------------------------------------------------------------------------------------|------------------------------------------------------------|-----------------------------------------------------------------------------|
| <b>Major outcomes at 12 months</b> |                                      |                                                                                                                                                                                                                                                                                       |                                                            |                                                                             |
| N with relapse                     | RCT: 1 (149)<br>FRNS/SDNS            | <p>One RCT with 149 participants with imprecise information on outcome showing no difference in outcome between treatment groups.</p> <p>RR for relapse at 12 months is 0.90 [95% CI 0.70, 1.16].</p> <p>Absolute number with relapse: levamisole 658 per 1000; MMF 592 per 1000.</p> | Low (evidence downgraded for single study and imprecision) | Risk of relapse during treatment may not differ between MMF and levamisole. |

|                        |                           |                                                                                                                                                                                                                                                                                   |                                                                 |                                                                                  |
|------------------------|---------------------------|-----------------------------------------------------------------------------------------------------------------------------------------------------------------------------------------------------------------------------------------------------------------------------------|-----------------------------------------------------------------|----------------------------------------------------------------------------------|
| N with FRNS/SDNS       | RCT: 1 (149)<br>FRNS/SDNS | One RCT with 149 participants with imprecise information on outcome showed no difference in outcome between treatment groups.<br><br>RR for FRNS/SDNS at 12 months is 0.88 (95% CI 0.41, 1.87).<br><br>Absolute number with FRNS/SDNS: levamisole 164 per 1000; MMF 145 per 1000. | Low (evidence downgraded for single study and imprecision)      | Risk of FRNS/SDNS may not differ between MMF and levamisole.                     |
| <b>Adverse effects</b> |                           |                                                                                                                                                                                                                                                                                   |                                                                 |                                                                                  |
| Abdominal pain         | RCT: 1 (149)              | One RCT with 149 participants with imprecise information on outcome showed no difference in outcome between treatment groups.<br><br>RR for abdominal pain is 1.26 (0.66 to 2.40)<br><br>Absolute number with abdominal pain: levamisole 178 per 1000; MMF 224 per 1000.          | Low (evidence downgraded for single study and imprecision)      | Risk of abdominal pain may not differ between MMF and levamisole.                |
| Anaemia                | RCT: 1 (149)              | One RCT with 149 participants with very imprecise information on outcome showed no difference in outcome between treatment groups.<br><br>RR for anaemia RR 0.48 (95% CI 0.04, 5.18)<br><br>Absolute number with anaemia: levamisole 27 per 1000; MMF 13 per 1000.                | Very low (evidence downgraded for single study and imprecision) | It is uncertain whether the risk for anaemia differs between MMF and levamisole. |

GRADE: Grading of Recommendations Assessment, Development and Evaluation used to assess certainty (or quality) of the body of evidence

RR = relative risk; 95% CI = 95% confidence intervals

### Levamisole compared with prednisone or placebo in relapsing SSNS

| Outcome                            | Study design: N. (Total/type participants)*                        | Findings & direction of effect                                                                                                                                                                                                                         | Strength of evidence (GRADE)                                                              | Conclusions                                                                                                                                       |
|------------------------------------|--------------------------------------------------------------------|--------------------------------------------------------------------------------------------------------------------------------------------------------------------------------------------------------------------------------------------------------|-------------------------------------------------------------------------------------------|---------------------------------------------------------------------------------------------------------------------------------------------------|
| <b>Major outcomes by 12 months</b> |                                                                    |                                                                                                                                                                                                                                                        |                                                                                           |                                                                                                                                                   |
| Relapse on treatment               | RCTs: 7 (426)<br>FRNS: 2 RCTs<br>SDNS: 2 RCTs<br>FRNS/SDNS: 3 RCTs | Seven RCTs with 426 participants with imprecise information on outcome.<br><br>RR for relapse 0.52 [95% CI 0.33, 0.82]<br><br>Absolute number with relapse:<br>PDN/placebo 764 per 1000;<br>levamisole 398 per 1000.                                   | Low (evidence downgraded for risk of bias issues and heterogeneity between study results) | Risk of relapse may be reduced with levamisole compared with PDN/ placebo.                                                                        |
| <b>Adverse effects</b>             |                                                                    |                                                                                                                                                                                                                                                        |                                                                                           |                                                                                                                                                   |
| Leucopenia                         | RCTs: 3 (214)                                                      | Three RCTs with 214 participants with imprecise information about uncommon outcome<br><br>RR for leukopenia during treatment is 4.18 [95% CI 0.72 to 24.21]<br><br>Absolute number with leukopenia:<br>PDN/placebo 10 per 1000; levamisole 41 per 1000 | Low (evidence downgraded for risk of bias issues and imprecision)                         | Risk of leucopenia may not differ between levamisole and PDN/placebo.                                                                             |
| Positive ANA                       | RCT: 1 (100)                                                       | One RCT with 100 participants with imprecise information about uncommon outcome<br><br>RR for positive ANA during treatment RR 3.00 [0.13, 71.92]<br><br>Absolute number with positive ANA:<br>PDN/placebo 10 per 1000; levamisole 30 per 1000         | Low (evidence downgraded for risk of bias issues and imprecision)                         | Risk of positive ANA during treatment may be higher with levamisole but small numbers result in considerable uncertainty about the true estimate. |



GRADE: Grading of Recommendations Assessment, Development and Evaluation used to assess certainty (or quality) of the body of evidence

RR = relative risk; 95% CI = 95% confidence intervals; ANA = antinuclear antibody;

\*One study (Weiss 1993) excluded as participants received 2.5 mg/kg for two doses on consecutive days rather than 2.5 mg/kg on alternate days

### Alkylating agents (cyclophosphamide and chlorambucil) compared with cyclosporin in relapsing SSNS

| Outcome                                    | Study design:<br>N (Total participants)         | Findings & direction of effect                                                                                                                                                                                                                          | Strength of evidence (GRADE)                                                                   | Conclusions                                                                                          |
|--------------------------------------------|-------------------------------------------------|---------------------------------------------------------------------------------------------------------------------------------------------------------------------------------------------------------------------------------------------------------|------------------------------------------------------------------------------------------------|------------------------------------------------------------------------------------------------------|
| <b>Major outcomes by 12 months</b>         |                                                 |                                                                                                                                                                                                                                                         |                                                                                                |                                                                                                      |
| Relapse at end of therapy (6-9 months)     | RCTs: 2 (95)<br>FRNS: 1 RCT<br>FRNS/SDNS: 1 RCT | Two RCTs with consistent but imprecise information about the outcome.<br><br>RR for relapse at end of therapy is 0.91 [95% CI 0.55, 1.48]<br><br>Absolute number with relapse: CsA 400 per 1000; alkylating agents 364 per 1000.                        | Low certainty evidence (downgraded for risk of bias issues and imprecision)                    | Number with relapse may not differ between CsA and alkylating agents at end of therapy (6-9 months). |
| Relapse at 12-24 mths after end of therapy | RCTs: 2 (95)<br>FRNS: 1 RCT<br>FRNS/SDNS: 1 RCT | Two RCTs with consistent but imprecise information about the outcome.<br><br>RR for relapse at 12-24 months after the end of therapy is 0.51 [95% CI 0.35, 0.74]<br><br>Absolute number with relapse: CsA 860 per 1000; alkylating agents 439 per 1000. | Low certainty evidence (downgraded for risk of bias issues and small numbers of participants). | Number with relapse at 12-24 months after the end of therapy may be higher with CsA.                 |
| <b>Adverse effects</b>                     |                                                 |                                                                                                                                                                                                                                                         |                                                                                                |                                                                                                      |

|                                                        |               |                                                                                                                                                                                                                                                      |                                                                                              |                                                                                           |
|--------------------------------------------------------|---------------|------------------------------------------------------------------------------------------------------------------------------------------------------------------------------------------------------------------------------------------------------|----------------------------------------------------------------------------------------------|-------------------------------------------------------------------------------------------|
| Hypertrichosis                                         | RCTs: 2 (106) | <p>Two RCTs with consistent but imprecise information about the outcome.</p> <p>RR for hypertrichosis is 0.06 [95% CI 0.01, 0.40]</p> <p>Absolute number with hypertrichosis: CsA 339 per 1000; alkylating agents 20 per 1000</p>                    | Low certainty evidence (downgraded for risk of bias issues and small number of participants) | Number with hypertrichosis may be higher with CsA.                                        |
| Gum hypertrophy                                        | RCTs: 2 (106) | <p>Two RCTs with consistent but imprecise information about outcome</p> <p>RR for gum hypertrophy is 0.08 [95% CI 0.01, 0.59].</p> <p>Absolute number with gum hypertrophy: CsA 232 per 1000; alkylating agents 19 per 1000.</p>                     | Low certainty evidence (downgraded for risk of bias issues and small number of participants) | Number with gum hypertrophy may be higher with CsA.                                       |
| Number of participants with elevated creatinine levels | RCTs: 2 (106) | <p>Two RCTs with consistent but imprecise information about the outcome.</p> <p>RR for elevated creatinine levels is 0.20 [95% CI 0.02, 1.69]).</p> <p>Absolute number with elevated creatinine: CsA 89 per 1000; alkylating agents 18 per 1000.</p> | Low certainty evidence (downgraded for risk of bias issues and imprecision)                  | Numbers with elevated creatinine levels may not differ between alkylating agents and CsA. |

|              |              |                                                                                                                                                                                                      |                                                                                  |                                                                                                 |
|--------------|--------------|------------------------------------------------------------------------------------------------------------------------------------------------------------------------------------------------------|----------------------------------------------------------------------------------|-------------------------------------------------------------------------------------------------|
| Hypertension | RCTs: 1 (40) | One RCT with very imprecise information about the outcome.<br>RR for hypertension is 0.33 [95% CI 0.01, 7.72].<br>Absolute number with hypertension: CsA 50 per 1000; alkylating agents 17 per 1000. | Very low certainty evidence (downgraded for risk of bias issues and imprecision) | It is uncertain whether the numbers with hypertension differ between alkylating agents and CsA. |
| Leucopenia   | RCT: 1 (66)  | One RCT with very imprecise information about the outcome.<br>RR for leucopenia is 29.84 [95% CI 1.84, 483.93].<br>Absolute number with leucopenia: CsA no events; alkylating agents not calculated. | Very low certainty evidence (downgraded for risk of bias issues and imprecision) | It is uncertain whether the numbers with leucopenia differ between alkylating agents and CsA .  |

GRADE: Grading of Recommendations Assessment, Development and Evaluation used to assess certainty (or quality) of the body of evidence

RR = relative risk; 95% CI = 95% confidence intervals

### Alkylating agents (cyclophosphamide and chlorambucil) compared with PDN in relapsing SSNS

| Outcome                                     | Study design<br>N studies<br>(N)    | Findings &<br>direction of effect                                                                                                 | Strength of<br>evidence<br>(GRADE)                               | Conclusion                                                          |
|---------------------------------------------|-------------------------------------|-----------------------------------------------------------------------------------------------------------------------------------|------------------------------------------------------------------|---------------------------------------------------------------------|
| <b>Major outcomes by 6-12 months</b>        |                                     |                                                                                                                                   |                                                                  |                                                                     |
| Cyclophosphamid;<br>relapse at 6-12<br>mths | RCTs: 4<br>(141)<br>FRNS: 4<br>RCTs | Four RCTs with consistent and precise information about the outcome.<br>RR for relapse at 6-12 months is 0.47 [95% CI 0.34, 0.66] | Moderate certainty evidence (downgraded for risk of bias issues) | Numbers with relapse are probably fewer with CYC compared with PDN. |

|                                            |                                                              |                                                                                                                                                                                                                                                                          |                                                                                               |                                                                                              |
|--------------------------------------------|--------------------------------------------------------------|--------------------------------------------------------------------------------------------------------------------------------------------------------------------------------------------------------------------------------------------------------------------------|-----------------------------------------------------------------------------------------------|----------------------------------------------------------------------------------------------|
| Chlorambucil;<br>relapse at 6 mths         | RCTs: 2<br>(41)<br><br>FRNS: 1<br>RCT<br><br>SDNS: 1<br>RCT  | Two RCTs with consistent but imprecise information about the outcome.<br><br>RR for relapse at 6 months is 0.19 [95% CI 0.03, 1.09]                                                                                                                                      | Low certainty evidence (downgraded for risk of bias issues and small numbers of participants) | Numbers with relapse may be fewer with chlorambucil compared with PDN.                       |
| Alkylating agents;<br>relapse at 6-12 mths | RCTs: 6<br>(182)<br><br>FRNS: 5<br>RCT<br><br>SDNS: 1<br>RCT | Six RCTs with consistent and precise information about the outcome.<br><br>RR for relapse at 6-12 months is 0.44 (95% CI 0.32 to 0.60)<br><br>Absolute number with relapse: PDN/placebo 740 per 1000; alkylating agents 326 per 1000                                     | Moderate certainty evidence (downgraded for risk of bias issues)                              | Numbers with relapse are probably reduced by CYC compared with PDN.                          |
| <b>Adverse effects</b>                     |                                                              |                                                                                                                                                                                                                                                                          |                                                                                               |                                                                                              |
| Leucopenia (CPA)                           | RCTs: 2<br>(78)                                              | Two RCTs with with consistent but imprecise information about the outcome.<br><br>RR for leucopenia at 6-12 months is 10.63 [95% CI 1.45, 78.05] (risk lower with PDN)<br><br>Absolute number with leucopenia: No events with PDN; number with CYC cannot be calculated. | Very low certainty evidence (downgraded for risk of bias issues and imprecision)              | It is uncertain whether the number with leucopenia are increased with CYC compared with PDN. |

|                  |                |                                                                                                                                                                                                                                                    |                                                                                  |                                                                                              |
|------------------|----------------|----------------------------------------------------------------------------------------------------------------------------------------------------------------------------------------------------------------------------------------------------|----------------------------------------------------------------------------------|----------------------------------------------------------------------------------------------|
| Leucopenia (CHL) | RCT: 1<br>(20) | One RCT with uncertain information on outcome because of small patient numbers.<br><br>RR of leukopenia at 6 months is 2.50 [95% CI 0.11, 54.87]<br><br>Absolute number with leucopenia: No events with PDN; number with CHL cannot be calculated. | Very low certainty evidence (downgraded for risk of bias issues and imprecision) | It is uncertain whether the number with leucopenia are increased with CHL compared with PDN. |
|------------------|----------------|----------------------------------------------------------------------------------------------------------------------------------------------------------------------------------------------------------------------------------------------------|----------------------------------------------------------------------------------|----------------------------------------------------------------------------------------------|

GRADE: Grading of Recommendations Assessment, Development and Evaluation used to assess certainty (or quality) of the body of evidence

RR = relative risk; 95% CI = 95% confidence intervals; CPA = cyclophosphamide; CHL = chlorambucil

### Intravenous cyclophosphamide compared with oral cyclophosphamide in relapsing SSNS

| Outcome               | Study design. N studies (N)     | Findings & direction of effect                                                                                                                                                               | Strength of evidence (GRADE)                                                                             | Conclusions                                                              |
|-----------------------|---------------------------------|----------------------------------------------------------------------------------------------------------------------------------------------------------------------------------------------|----------------------------------------------------------------------------------------------------------|--------------------------------------------------------------------------|
| <b>Major outcomes</b> |                                 |                                                                                                                                                                                              |                                                                                                          |                                                                          |
| Relapse at 6 months   | RCT: 2 (83)<br><br>SDNS: 2 RCTs | Two RCTs with consistent information for the outcome.<br><br>RR for relapse is 0.54 [95% CI 0.34, 0.88].<br><br>Absolute numbers with relapse: oral CPA 524 per 1,000; IV CPA 283 per 1,000. | Low certainty evidence (downgraded for risk of bias issues and imprecision due to small patient numbers) | Numbers with relapse at 6 months may not differ between IV and oral CYC. |

|                                     |                             |                                                                                                                                                                                                                  |                                                                                                          |                                                                                 |
|-------------------------------------|-----------------------------|------------------------------------------------------------------------------------------------------------------------------------------------------------------------------------------------------------------|----------------------------------------------------------------------------------------------------------|---------------------------------------------------------------------------------|
| Relapse at end of study (24 months) | RCT: 2 (83)<br>SDNS: 2 RCTs | Two RCTs with consistent information for the outcome.<br><br>RR for relapse at the end of study is 0.99 [95% CI 0.76, 1.29].<br><br>Absolute numbers with relapse: oral CPA 619 per 1,000; IV CPA 613 per 1,000. | Low certainty evidence (downgraded for risk of bias issues and imprecision due to small patient numbers) | Number with relapse at the end of study may not differ between IV and oral CYC. |
| <b>Adverse effects</b>              |                             |                                                                                                                                                                                                                  |                                                                                                          |                                                                                 |
| Leucopenia                          | RCT: 2 (83)                 | Two RCTs with consistent but imprecise information for the outcome.<br><br>RR for leukopenia is 0.37 [95% CI 0.09, 1.51]<br><br>Absolute numbers with leucopenia: oral CYC 143 per 1000; IV CYC 53 per 1000.     | Low certainty evidence (downgraded for risk of bias issues and imprecision due to small patient numbers) | Number with leucopenia may not differ between IV and oral CYC.                  |
| Hair loss                           | RCT: 2 (83)                 | Two RCTs with consistent but imprecise information for the outcome.<br><br>RR for hair loss is 0.19 [95% CI 0.04, 1.03]<br><br>Absolute numbers with hair loss: oral CPA 381 per 1000; IV CYC 72 per 1,000.      | Low certainty evidence (downgraded for risk of bias issues and imprecision due to small patient numbers) | Number with hair loss may not differ between IV and oral CYC.                   |

|                |                |                                                                                                                                                                                                        |                                                                                                          |                                                                   |
|----------------|----------------|--------------------------------------------------------------------------------------------------------------------------------------------------------------------------------------------------------|----------------------------------------------------------------------------------------------------------|-------------------------------------------------------------------|
| All infections | RCT: 2<br>(83) | Two RCTs with consistent but imprecise information for the outcome.<br><br>RR for infections is 0.14 [0.03, 0.72].<br><br>Absolute numbers with infections: oral CYC 238 per 1000; IV CYC 33 per 1000. | Low certainty evidence (downgraded for risk of bias issues and imprecision due to small patient numbers) | Number of infections may be lower with IV compared with oral CYC. |
|----------------|----------------|--------------------------------------------------------------------------------------------------------------------------------------------------------------------------------------------------------|----------------------------------------------------------------------------------------------------------|-------------------------------------------------------------------|

GRADE: Grading of Recommendations Assessment, Development and Evaluation used to assess certainty (or quality) of the body of evidence;

RR = relative risk; 95% CI = 95% confidence intervals; CYC = cyclophosphamide

**Table S7 : SSNS Randomised controlled trials – Steroid-sparing and immunomodulatory agents in FRNS, SDNS**  
**Based on:**  
 Larkins et al. [20]

| <b>Table S7.1 Outcome/ Relapses</b>                                           |                              |                                        |                                              |                       |                    |                           |            |                |                                                                     |
|-------------------------------------------------------------------------------|------------------------------|----------------------------------------|----------------------------------------------|-----------------------|--------------------|---------------------------|------------|----------------|---------------------------------------------------------------------|
| <b>Study</b>                                                                  | <b>Population</b>            | <b>Intervention</b>                    | <b>Comparator</b>                            | <b>Outcome</b>        | <b>No. studies</b> | <b>Total Participants</b> | <b>RR*</b> | <b>95% CI*</b> | <b>Conclusions</b>                                                  |
| <b>RITUXIMAB</b>                                                              |                              |                                        |                                              |                       |                    |                           |            |                |                                                                     |
| Four studies 2011 to 2018                                                     | SDNS with CNI dependence     | Rituximab 1-4 doses                    | Placebo (2)<br>CNI (3)<br>Prednisone (4)     | Relapse by 3 months   | 3                  | 132                       | 0.32       | 0.14 – 0.70    | Reduced risk of relapse with rituximab compared with CNI/prednisone |
| Ahn 2018 [21]<br>Iijima 2014a [22]<br>NEPHRUTIX 2018 [23]<br>Ravani 2011 [24] |                              |                                        |                                              | Relapse by 6 months   | 3                  | 122                       | 0.30       | 0.19 – 0.47    |                                                                     |
|                                                                               |                              |                                        |                                              | Relapse by 12 months  | 2                  | 168                       | 0.74       | 0.58 – 0.94    |                                                                     |
| Three studies 2015 to 2020                                                    | SDNS/FRNS on prednisone      | Rituximab 1 - 2 doses                  | Low dose prednisone (3)<br>CNI (1)           | Relapse by 6 months   | 3                  | 180                       | 0.06       | 0.01 – 0.22    | Reduced risk of relapse with RTX compared with CNI/prednisone       |
| RITURNS 2018 [25]<br>Ravani 2015 [26]<br>Ravani 2020 [27]                     |                              |                                        |                                              | Relapse by 12 months  | 3                  | 180                       | 0.39       | 0.17 – 0.88    |                                                                     |
| <b>CYCLOSPORIN</b>                                                            |                              |                                        |                                              |                       |                    |                           |            |                |                                                                     |
| APN 2006 [28]                                                                 | SSNS 1 <sup>st</sup> episode | Cyclosporin 8 wks<br>Prednisone 12 wks | Prednisone 12 wks                            | Relapse by 6 months   | 1                  | 104                       | 0.33       | 0.13 – 0.83    | Reduced risk of relapse with cyclosporin by 6 months                |
|                                                                               |                              |                                        |                                              | Relapse by 12 months  |                    |                           | 0.72       | 0.46 – 1.13    | No difference in relapse by 12 months                               |
| Two studies 1992, 1993                                                        | FRNS/SDNS SDNS               | Cyclosporin 6-12 mths                  | Cyclophosphamide 8 wks or Chlorambucil 6 wks | Relapse by 6-9 months | 2                  | 95                        | 0.91       | 0.55 – 1.48    | No difference in risk of relapse                                    |
| Niaudet 1992 [29]<br>Ponticelli 1993 [30]                                     |                              |                                        |                                              |                       |                    |                           |            |                |                                                                     |
| <b>CYCLOSPORIN DOSING</b>                                                     |                              |                                        |                                              |                       |                    |                           |            |                |                                                                     |
| Ishikura 2008 [31]                                                            | FRNS                         | Cyclosporin                            | Cyclosporin                                  | Relapse at 6          | 1                  | 44                        | 0.31       | 0.1 – 1.02     | No difference in                                                    |



| Study                                            | Population | Intervention                                                                                                 | Comparator                                                                                              | Outcome                                                | No. studies | Total Participants | RR*          | 95% CI*                    | Conclusions                                                                                              |
|--------------------------------------------------|------------|--------------------------------------------------------------------------------------------------------------|---------------------------------------------------------------------------------------------------------|--------------------------------------------------------|-------------|--------------------|--------------|----------------------------|----------------------------------------------------------------------------------------------------------|
|                                                  |            | dosing after 6 months: aiming for trough levels at 60-80 ng/ml (mean dose 5.4 mg/kg/d to maintain remission) | dosing after 6 months: fixed dose 2.5 mg/kg/d                                                           | months<br>Relapse at 12 months<br>Relapse at 24 months | 1<br>1      | 44<br>44           | 0.33<br>0.65 | 0.16 – 0.70<br>0.45 – 0.94 | relapse at 6 months<br>Reduced risk of relapse with cyclosporine aiming for trough levels at 60-80 ng/ml |
| Iijima 2014 [32]                                 | SDNS/FRNS  | High-dose cyclosporine 6 months (target C2 levels 600-700 ng/ml), followed by 450-550 ng/ml for 18 months    | Low-dose cyclosporine 6 months (target C2 level 450-550 ng/ml), followed by 300-400 ng/ml for 18 months | Relapse at 24 months                                   | 1           | 85                 | 0.74         | 0.45 – 1.22                | No difference in relapse at 24 months                                                                    |
| <b>MYCOPHENOLATE MOFETIL</b>                     |            |                                                                                                              |                                                                                                         |                                                        |             |                    |              |                            |                                                                                                          |
| Two studies 2008, 2013                           | FRNS/SDNS  | MMF 1 year                                                                                                   | Cyclosporin 1 yr                                                                                        | Relapse by 12 months                                   | 2           | 82                 | 1.90         | 0.66 – 5.46                | No difference in risk of relapse (Gellermann - first part of cross-over study included)                  |
| Dorresteijn 2008 [33]<br>Gellermann 2013 [34]    |            |                                                                                                              |                                                                                                         |                                                        |             |                    |              |                            |                                                                                                          |
| One study 2019<br>Sinha 2019 [35]                | FRNS/SDNS  | MMF 1 year                                                                                                   | Levamisole 1 yr                                                                                         | Relapse by 12 months                                   | 1           | 149                | 0.90         | 0.70 – 1.16                | No difference in risk of relapse                                                                         |
| <b>LEVAMISOLE</b>                                |            |                                                                                                              |                                                                                                         |                                                        |             |                    |              |                            |                                                                                                          |
| Eight studies 1991 to 2015                       | FRNS/SDNS  | Levamisole 4 to 12 months                                                                                    | Placebo, prednisone or no treatment                                                                     | Relapse by 4 – 12 months                               | 8           | 474                | 0.52         | 0.33 – 0.82                | Reduced risk for relapse with levamisole                                                                 |
| Abeyagunawardena 2006 [36]<br>Al-Saran 2006 [37] |            |                                                                                                              |                                                                                                         |                                                        |             |                    |              |                            |                                                                                                          |

| Study                                                                                                                                        | Population | Intervention                             | Comparator                     | Outcome                                                           | No. studies | Total Participants | RR*  | 95% CI*     | Conclusions                                        |
|----------------------------------------------------------------------------------------------------------------------------------------------|------------|------------------------------------------|--------------------------------|-------------------------------------------------------------------|-------------|--------------------|------|-------------|----------------------------------------------------|
| BAPN 1991<br>Dayal 1994<br>Gruppen 2015 [38]<br>Rashid 1996 [39]<br>Sural 2001 (group 1 and 3) [40]<br>Weiss 1993 [41]                       |            |                                          |                                |                                                                   |             |                    |      |             |                                                    |
| Two studies 2001, 2005<br>Donia 2005 [42]<br>Sural 2001 [40]                                                                                 | FRNS/SDNS  | Levamisole 6 months                      | Cyclophosphamide<br>Prednisone | Relapse at 6 – 9 months after treatment                           | 2           | 97                 | 1.17 | 0.76 – 1.81 | No difference in risk of relapse                   |
| <b>ALKYLATING AGENTS</b>                                                                                                                     |            |                                          |                                |                                                                   |             |                    |      |             |                                                    |
| Six studies 1970 to 2001<br>Alatas 1978 [43]<br>Barratt 1970 [44]<br>Chiu 1973 [45]<br>Grupe 1976 [46]<br>ISKDC 1974 [47]<br>Sural 2001 [40] | FRNS/SDNS  | Cyclophosphamide or chlorambucil         | Prednisone                     | Relapse at 6 months                                               | 6           | 202                | 0.44 | 0.32 – 0.60 | Reduced risk of relapse with alkylating agents     |
| Two studies 2004, 2006<br>Prasad 2004 [48]<br>Abeygunawardena 2006 [49]                                                                      | SDNS       | IV Cyclophosphamide monthly for 6 months | Oral cyclophosphamide 12 weeks | Relapse 6 months after treatment<br>Relapse after 12 to 24 months | 2           | 83                 | 0.54 | 0.34 - 0.88 | Reduced risk of relapse after 6 months with IV CPH |
| APN 1982 [50]                                                                                                                                | SDNS/FRNS  | Cyclophosphamide                         | Chlorambucil                   | Relapse at 12 months<br>Adverse                                   | 1           | 50                 | 1.15 | 0.69 – 1.94 | No difference in risk of relapse                   |
|                                                                                                                                              |            |                                          |                                |                                                                   |             |                    | 0.65 | 0.42 – 1.01 | No difference of                                   |

| Study                                    | Population | Intervention                             | Comparator                             | Outcome                                                                                     | No. studies | Total Participants | RR*  | 95% CI*      | Conclusions                                                                     |
|------------------------------------------|------------|------------------------------------------|----------------------------------------|---------------------------------------------------------------------------------------------|-------------|--------------------|------|--------------|---------------------------------------------------------------------------------|
| Abeyagunawardena 2007 [51]               | SDNS       | Cyclophosphamide                         | Vincristine                            | Relapse at 12 months                                                                        | 1           | 39                 | 0.54 | 0.54 – 1.12  | No difference in risk of relapse                                                |
| <b>CYCLOPHOSPHAMIDE DURATION/ DOSING</b> |            |                                          |                                        |                                                                                             |             |                    |      |              |                                                                                 |
| Barratt 1973 [52]                        | FRNS       | Cyclophosphamide 8 weeks                 | Cyclophosphamide 2 weeks               | Relapse at 12 months                                                                        | 1           | 32                 | 0.15 | 0.04 – 0.57  | Uncertain, very low certainty of evidence                                       |
| Ueda 1990 [53]                           | SDNS       | Cyclophosphamide 12 weeks                | Cyclophosphamide 8 weeks               | Relapse at 12 months                                                                        | 1           | 73                 | 1.04 | 0.75 – 1.44  | No difference in risk of relapse at 12 and 24 months                            |
| McCroy 1973 [54]                         | FRNS       | Cyclophosphamide 5 mg/kg/day, 6 weeks    | Cyclophosphamide 2.5 mg/kg/d, 12 weeks | Relapse at 12 months<br>Adverse effects                                                     | 1           | 14                 | 2.33 | 0.11 – 48.99 | Uncertain, very low certainty of evidence                                       |
| <b>CHLORAMBUCIL DOSING REGIMEN</b>       |            |                                          |                                        |                                                                                             |             |                    |      |              |                                                                                 |
| Baluarte 1978 [55]                       | FRNS       | Chlorambucil – increasing dosing regimen | Chlorambucil stable dosing regimen     | Relapse at 12 months                                                                        | 1           | 21                 | 0.18 | 0.01 – 3.41  | Uncertain, very low certainty of evidence                                       |
| <b>OTHER AGENTS</b>                      |            |                                          |                                        |                                                                                             |             |                    |      |              |                                                                                 |
| <b>MIZORIBINE</b>                        |            |                                          |                                        |                                                                                             |             |                    |      |              |                                                                                 |
| Yoshioka 2000 [56]                       | FRNS       | Mizoribine                               | Placebo                                | Relapse at 6 and 12 months<br>Adverse effects during treatment<br>Cumulative remission rate | 1           | 197                | 1.56 | 0.97 – 2.49  | More adverse effects during treatment<br>Little/ no difference (HR 0.79, 95% CI |

| Study                           | Population | Intervention      | Comparator                  | Outcome                                          | No. studies | Total Participants | RR*       | 95% CI*       | Conclusions                                                                                   |
|---------------------------------|------------|-------------------|-----------------------------|--------------------------------------------------|-------------|--------------------|-----------|---------------|-----------------------------------------------------------------------------------------------|
| <b>AZITHROMYCIN</b>             |            |                   |                             |                                                  |             |                    |           |               |                                                                                               |
| Zhang 2014 [57]                 | SSNS       | Azithromycin      | Prednisone                  | Relapse at 6 months                              | 1           | 190                | 0.55      | 0.3 – 1.02    | No difference in risk of relapse                                                              |
| <b>AZATHIOPRINE</b>             |            |                   |                             |                                                  |             |                    |           |               |                                                                                               |
| 2 studies 1970, 1977            | SDNS/FRNS  | Azathioprine      | Prednisone                  | Relapse at 6 months                              | 2           | 60                 | 0.9       | 0.59 – 1.38   | No difference in risk of relapse                                                              |
| ISKDC 1970 [58]<br>Barratt 1977 |            |                   |                             |                                                  |             |                    |           |               |                                                                                               |
| <b>ACTH gel</b>                 |            |                   |                             |                                                  |             |                    |           |               |                                                                                               |
| Wang C (ATLANTIS) 2018 [59]     | FRNS/SDNS  | ACTH gel          | Prednisone for relapse only | Relapse at 6 months                              | 1           | 31                 | 1.00      | 0.83 – 1.20   | No difference in risk of relapse. Frequent adverse effects                                    |
| <b>FUSIDIC ACID</b>             |            |                   |                             |                                                  |             |                    |           |               |                                                                                               |
| Cerkauskiene 2005 [60]          | FRNS       | Oral fusidic acid | Prednisone                  | Time to remission/<br>relapse<br>Adverse affects | 1           | 18                 | Not perf. | Not performed | No meta-analyses performed<br><br>No differences in mean time to remission or time to relapse |

\*RR, Relative risk, 95% CI, 95% confidence intervals

**Table S7.2 Adverse events**

| <b>Intervention vs. Comparator</b>      | <b>Adverse Event</b>                  | <b>N studies</b>                                                                  | <b>Total Participants</b> | <b>Intervention N events/ N participants</b> | <b>Comparator N events/ N participants</b> | <b>RR*</b> | <b>95% CI*</b> | <b>I<sup>2</sup></b> |
|-----------------------------------------|---------------------------------------|-----------------------------------------------------------------------------------|---------------------------|----------------------------------------------|--------------------------------------------|------------|----------------|----------------------|
| <b>Rituximab vs. Placebo or control</b> | Moderate to severe infusion reactions | 4<br>Jijma 2011 [22]<br>Ravani 2011 [24]<br>Ravani 2015 [26]<br>RITURNS 2018 [25] | 252                       | 11/126                                       | 1/126                                      | 5.83       | 1.34 – 25.29   | 0%                   |
|                                         | Severe Infection                      | 3<br>Jijma 2011 [22]<br>Ravani 2011 [24]                                          | 222                       | 13/111                                       | 20/111                                     | 0.9        | 0.26 – 3.15    | 46.21%               |
|                                         | Arthropathy                           | 2<br>Ravani 2011 [24]<br>Ravani 2015 [26]                                         | 84                        | 3/42                                         | 0/42                                       | 3.92       | 0.45 – 33.98   | 0%                   |
| <b>MMF vs. Levamisole</b>               | Peritonitis                           | 1<br>Sinha 2019 [35]                                                              | 149                       | 1/76                                         | 3/73                                       | 0.32       | 0.03 – 3.01    | n.a.                 |
|                                         | Abdominal pain                        | 1<br>Sinha 2019 [35]                                                              | 149                       | 17/76                                        | 13/73                                      | 1.26       | 0.66 – 2.4     | n.a.                 |
|                                         | Anaemia                               | 1<br>Sinha 2019 [35]                                                              | 149                       | 1/76                                         | 2/73                                       | 0.48       | 0.04 -5.18     | n.a.                 |
|                                         | Leucopenia                            | 1<br>Sinha 2019 [35]                                                              | 149                       | 1/76                                         | 0/73                                       | 2.88       | 0.12 – 69.65   | n.a.                 |
|                                         | Hypertension                          | 3<br>Dorresteijn 2008 [33]<br>Uddin 2016 [61]<br>Gellermann 2013                  | 144                       | 6/72                                         | 21/72                                      | 0.3        | 0.09 – 1.07    | 40.26%               |
| <b>MMF vs. Cyclosporin</b>              | Hypertichosis                         | 3<br>Dorresteijn 2008 [33]<br>Uddin 2016 [61]<br>Gellermann 2013 [34]             | 140                       | 5/72                                         | 29/68                                      | 0.23       | 0.1 – 0.5      | 0%                   |
|                                         | Lymphopenia                           | 2<br>Dorresteijn 2008 [33]<br>Gellermann 2013 [34]                                | 84                        | 1/42                                         | 2/42                                       | 0.64       | 0.08 – 4.85    | 0%                   |

| Intervention vs. Comparator                                | Adverse Event                   | N studies                                                             | Total Participants | Intervention N events/ N participants | Comparator N events/ N participants | RR*               | 95% CI*       | I <sup>2</sup> |
|------------------------------------------------------------|---------------------------------|-----------------------------------------------------------------------|--------------------|---------------------------------------|-------------------------------------|-------------------|---------------|----------------|
| Levamisole vs. steroids or placebo or both or no treatment | Gum hypertrophy                 | 3<br>Dorresteijn 2008 [33]<br>Uddin 2016 [61]<br>Gellermann 2013 [34] | 144                | 0/72                                  | 15/72                               | 0.09              | 0.02 – 0.47   | 0%             |
|                                                            | Reduced GFR                     | 1<br>Dorresteijn 2008 [33]                                            | 24                 | 0/12                                  | 1/12                                | 0.33              | 0.01 – 7.45   | n.a.           |
|                                                            | Pneumonia                       | 1<br>Dorresteijn 2008 [33]                                            | 24                 | 1/12                                  | 0/12                                | 3.0               | 0.13 – 67.06  | n.a.           |
|                                                            | Diarrhea                        | 1<br>Uddin 2016 [61]                                                  | 60                 | 4/60                                  | 0/60                                | 9.0               | 0.51 – 160.17 | n.a.           |
| Levamisole vs. Cyclophosphamide                            | Leucopenia                      | 3<br>Al-Saran 2006 [37]<br>Sural 2001 [40]<br>Gruppen 2015 [38]       | 214                | 6/112                                 | 1/102                               | 4.18              | 0.72 – 24.21  | 0%             |
|                                                            | ANCA positive/ arthritits       | 1<br>Gruppen 2015 [38]                                                | 100                | 1/50                                  | 0/50                                | 3.0               | 0.13 – 71.92  | 0%             |
|                                                            | Infection                       | 1<br>Donia 2005 [42]                                                  | 40                 | 13/20                                 | 12/20                               | 1.08              | 0.67 – 1.75   | n.a.           |
| CSA + Predn. vs. prednisolone alone                        | Leucopenia                      | 2<br>Donia 2005 [42]<br>Sural 2001 [40]                               | 97                 | 1/50                                  | 5/47                                | 0.25              | 0,04 – 1.48   | 0%             |
|                                                            | Abnormal liver function tests   | 1<br>Donia 2005 [42]                                                  | 40                 | 0/20                                  | 1/20                                | 0.33              | 0.01 – 7.72   | n.a.           |
| CSA + Predn. vs. prednisolone alone                        | Number needing cytotoxic agents | 1<br>APN 2006 [28]                                                    | 104                | 5/49                                  | 12/55                               | 0.47              | 0.18 – 1.23   | n.a.           |
|                                                            | Creatinine at the end of study  | 1<br>APN 2006 [28]                                                    | 87                 | Mean creatinine 48.2 ± 11.1 µmol/l    | Mean creatinine 46.2 ± 10 µmol/l    | Mean difference 2 | -2.44, 6.44   | n.a.           |

| Intervention vs. Comparator              | Adverse Event                                   | N studies                  | Total Participants    | Intervention N events/ N participants | Comparator N events/ N participants | RR*   | 95% CI*      | I <sup>2</sup> |      |
|------------------------------------------|-------------------------------------------------|----------------------------|-----------------------|---------------------------------------|-------------------------------------|-------|--------------|----------------|------|
| <b>CsA dose: changing vs. fixed dose</b> | Hypertension                                    | 1<br>Ishikura 2008 [31]    | 44                    | 6/24                                  | 2/20                                | 2.5   | 0.57 – 11.05 | n.a.           |      |
|                                          | Psychological disorder                          | 1<br>Ishikura 2008 [31]    | 44                    | 0/24                                  | 1/20                                | 0.28  | 0.01 – 6.52  | n.a.           |      |
|                                          | Obesity                                         | 1<br>Ishikura 2008 [31]    | 44                    | 1/24                                  | 0/20                                | 2.52  | 0.11 – 58.67 | n.a.           |      |
|                                          | Hirsutism                                       | 1<br>Ishikura 2008 [31]    | 44                    | 4/24                                  | 2/20                                | 1.67  | 0.34 – 8.18  | n.a.           |      |
|                                          | Transient elevated creatinine                   | 1<br>Ishikura 2008 [31]    | 44                    | 2/24                                  | 1/20                                | 1.67  | 0.16 – 17.06 | n.a.           |      |
|                                          | Gym hypertrophy                                 | 1<br>Ishikura 2008 [31]    | 44                    | 2/24                                  | 4/20                                | 0.42  | 0.08 – 2.04  | n.a.           |      |
|                                          | GIT effects                                     | 1<br>Ishikura 2008 [31]    | 44                    | 2/24                                  | 2/20                                | 0.83  | 0.13 – 5.4   | n.a.           |      |
|                                          | Convulsions                                     | 1<br>Ishikura 2008 [31]    | 44                    | 1/24                                  | 0/20                                | 2.52  | 0.11 – 58.67 | n.a.           |      |
|                                          | Fatigue                                         | 1<br>Dorresteyjn 2008 [33] | 24                    | 1/12                                  | 0/12                                | 3     | 0.13 – 67.06 | n.a.           |      |
|                                          | <b>CsA dose: High vs. lower C2 target level</b> | Encephalopathy             | 1<br>Iijima 2014 [32] | 85                                    | 2/43                                | 1/42  | 1.95         | 0.18 – 20.74   | n.a. |
|                                          |                                                 | Infection                  | 1<br>Iijima 2014 [32] | 85                                    | 15/43                               | 13/42 | 1.13         | 0.61 – 2.07    | n.a. |
|                                          |                                                 | Pneumonia                  | 1<br>Iijima 2014 [32] | 85                                    | 3/43                                | 1/42  | 2.93         | 0.32 – 27.06   | n.a. |
|                                          |                                                 | Renal toxicity             | 1<br>Iijima 2014 [32] | 85                                    | 2/43                                | 0/42  | 4.89         | 0.24 – 98.85   | n.a. |
| Hirsutism                                |                                                 | 1<br>Iijima 2014 [32]      | 85                    | 23/43                                 | 20/42                               | 1.12  | 0.74 – 1.71  | n.a.           |      |

| Intervention vs. Comparator                                 | Adverse Event     | N studies                                                             | Total Participants | Intervention N events/<br>N participants | Comparator N events/<br>N participants | RR*   | 95% CI*       | I <sup>2</sup> |
|-------------------------------------------------------------|-------------------|-----------------------------------------------------------------------|--------------------|------------------------------------------|----------------------------------------|-------|---------------|----------------|
|                                                             | Gum hypertrophy   | 1<br>Iijima 2014 [32]                                                 | 85                 | 4/43                                     | 7/42                                   | 0.56  | 0.18 – 1.77   | n.a.           |
|                                                             | Hypertension      | 1<br>Iijima 2014 [32]                                                 | 85                 | 7/43                                     | 5/42                                   | 1.37  | 0.47 – 3.97   | n.a.           |
| <b>Alkylating agents vs. CsA</b>                            | Serume creatinine | 2<br>Niaudet 1992 [29]<br>Edefonti 1998                               | 106                | 0/50                                     | 5/56                                   | 0.2   | 0.02 – 1.69   | 0%             |
|                                                             | Hypertichosis     | 2<br>Niaudet 1992 [29]<br>Edefonti 1998                               | 106                | 0/50                                     | 19/56                                  | 0.06  | 0.01 – 0.40   | 0%             |
|                                                             | Gum hypertrophy   | 2<br>Niaudet 1992 [29]<br>Edefonti 1998                               | 106                | 0/50                                     | 13/50                                  | 0.08  | 0.01 – 0.59   | 0%             |
|                                                             | Hypertension      | 1<br>Niaudet 1992 [29]                                                | 40                 | 0/20                                     | 1/20                                   | 0.33  | 0.01 – 7.72   | n.a.           |
|                                                             | Leucopenia        | 1<br>Edefonti 1998                                                    | 66                 | 12/30                                    | 0/30                                   | 29.84 | 1.84 – 483.93 | n.a.           |
|                                                             | Leucopenia        | 3<br>CPA (Sural 2001 [40], Chiu 1973 [45])<br>1 CHL (Atlas 1978 [43]) | 78                 | 10/39                                    | 0/39                                   | 10.63 | 1.45 – 78.05  | 0%             |
| <b>CPA duration long (12 wks) vs. short (8 wks)</b>         | Leucopenia        | 1<br>Ueda 1990 [53]                                                   | 73                 | 14/41                                    | 9/32                                   | 1.21  | 0.6 – 2.44    | n.a.           |
|                                                             | Leucopenia        | 1<br>McCroory 1973 [54]                                               | 14                 | 2/8                                      | 5/6                                    | 0.3   | 0.09 – 1.05   | n.a.           |
| <b>CPA low dose (2.5 mg/kg/d) vs. high dose (5 mg/kg/d)</b> | Lymphopenia       | 1<br>McCroory 1973 [54]                                               | 14                 | 5/8                                      | 6/6                                    | 0.66  | 0.38 – 1.15   | n.a.           |



| Intervention vs. Comparator            | Adverse Event       | N studies                                           | Total Participants | Intervention N events/<br>N participants | Comparator N events/<br>N participants | RR*  | 95% CI*      | I <sup>2</sup> |
|----------------------------------------|---------------------|-----------------------------------------------------|--------------------|------------------------------------------|----------------------------------------|------|--------------|----------------|
|                                        | Alopecia            | 1<br>McCroy 1973 [54]                               | 14                 | 0/8                                      | 4/6                                    | 0.09 | 0.01 – 1.35  | n.a.           |
|                                        | Gastrointestinal    | 1<br>McCroy 1973 [54]                               | 14                 | 1/8                                      | 3/6                                    | 0.25 | 0.03 - 1.85  | n.a.           |
|                                        | Genitourinary       | 1<br>McCroy 1973 [54]                               | 14                 | 1/8                                      | 3/6                                    | 0.25 | 0.03 – 1.85  | n.a.           |
| <b>IV CPA vs. oral CPA</b>             | Leucopenia          | 2<br>Abeyagunawardena 2006 [49]<br>Prasad 2004 [48] | 83                 | 2/41                                     | 6/42                                   | 0.37 | 0.09 – 1.51  | 0%             |
|                                        | Hair loss           | 2<br>Abeyagunawardena 2006 [49]<br>Prasad 2004 [48] | 83                 | 2/41                                     | 16/42                                  | 0.19 | 0.04 – 1.03  | 0%             |
|                                        | All infections      | 2<br>Abeyagunawardena 2006 [49]<br>Prasad 2004 [48] | 83                 | 1/41                                     | 10/42                                  | 0.14 | 0.03 – 0.72  | 0%             |
|                                        | Nausea and vomiting | 1<br>Prasad 2004 [48]                               | 47                 | 2/26                                     | 0/21                                   | 4.07 | 0.21 – 80.51 | n.a.           |
|                                        | Leucopenia          | 1<br>Baluarte 1978 [55]                             | 21                 | 7/11                                     | 3/11                                   | 2.12 | 0.74 – 6.04  | n.a.           |
| <b>CHL dose: increasing vs. stable</b> | Thrombocytopenia    | 1<br>Baluarte 1978 [55]                             | 21                 | 2/11                                     | 0/11                                   | 4.58 | 0.25 – 85.33 | n.a.           |
|                                        | Leucopenia          | 1<br>APN 1982 [50]                                  | 50                 | 3/26                                     | 3/24                                   | 0.92 | 0.21 – 4.14  | n.a.           |
| <b>CPA vs. CHL</b>                     | Lymphopenia         | 1<br>APN 1982 [50]                                  | 50                 | 7/26                                     | 15/24                                  | 0.43 | 0.21 – 0.87  | n.a.           |
|                                        | Thrombocytopenia    | 1<br>APN 1982 [50]                                  | 50                 | 7/26                                     | 15/24                                  | 0.43 | 0.21 – 0.87  | n.a.           |

| Intervention vs. Comparator | Adverse Event                     | N studies               | Total Participants | Intervention                |                | Comparator                  |                | RR*  | 95% CI* | I <sup>2</sup> |
|-----------------------------|-----------------------------------|-------------------------|--------------------|-----------------------------|----------------|-----------------------------|----------------|------|---------|----------------|
|                             |                                   |                         |                    | N events/<br>N participants | N participants | N events/<br>N participants | N participants |      |         |                |
|                             | Severe infection                  | 1<br>APN 1982 [50]      | 50                 | 2/26                        | 0/24           | 4.63                        | 0.23 – 91.81   | n.a. |         |                |
|                             | Hair loss                         | 1<br>APN 1982 [50]      | 50                 | 4/26                        | 0/24           | 8.33                        | 0.47 – 147.07  | n.a. |         |                |
|                             | Hematuria                         | 1<br>APN 1982 [50]      | 50                 | 0/26                        | 0/24           | Not estimable               | Not estimable  | n.a. |         |                |
| <b>MZR vs. placebo</b>      | <b>Hyperuricaemia<sup>a</sup></b> | 1<br>Yoshioka 2000 [56] | 197                | 16/99                       | 4/98           | 3.96                        | 1.37 – 11.42   | n.a. |         |                |
|                             | Hepatic dysfunction               | 1<br>Yoshioka 2000 [56] | 197                | 9/99                        | 9/98           | 0.99                        | 0.41 – 2.39    | n.a. |         |                |
|                             | Leucopenia                        | 1<br>Yoshioka 2000 [56] | 197                | 2/99                        | 1/98           | 1.98                        | 0.18 – 21.48   | n.a. |         |                |

RR, Relative risk, 95% CI, 95% confidence intervals, I<sup>2</sup>, measure of heterogeneity between studies (< 40%, not important, 30-60% moderate; >60% substantial). N.a. = not applicable

**Table S8: SSNS observational studies – Steroid-sparing and immunomodulatory agents in FRNS, SDNS**

**CONTENT:**

- Table S8.1 Calcineurin-Inhibitors (CNI): Cyclosporin A (CsA) and Tacrolimus (TAC)
- Table S8.2 Alkylating Agents: Cyclophosphamide (CPA) and Chlorambucil (CHL)
- Table S8.3 Mycophenolate mofetil (MMF)/ Mycophenolate Sodium (MPS)
- Table S8.4 Levamisol (LEV)
- Table S8.5 Rituximab (RTX)
- Table S8.6 Mizoribine (MZR)
- Table S8.7 Other Agents (Vincristine, Saquinavir, ACTH, Azathioprine)

**COMMENTS:**

- Only studies within the past 20 years were included (since 2000)
- Only studies that evaluating 20 or more children with SSNS were included for CNI, CPA, MMF

**ABBREVIATIONS:**

NS = Nephrotic syndrome; FRNS = Frequently relapsing nephrotic syndrome; SDNS = Steroid dependent nephrotic syndrome; RR = relapse rate; MMF = Mycophenolate mofetil; EC-MPS = Enteric coated mycophenolate sodium; MPA = Mycophenolic acid; pred = prednisolone or prednisone; LEV = levamisole; CPA = cyclophosphamide; CHL = chlorambucil; CSA = cyclosporine A; TAC = Tacrolimus; MZR = mizoribine; VCR = Vincristine; AZA = Azathioprine; MCD = Minimal change disease; FSGS = Focal and segmental glomerulosclerosis; AE = adverse effects; GIT = gastrointestinal

**Table S8.1: Calcineurin-Inhibitors (CNI): Cyclosporin A (CsA) and Tacrolimus (TAC)**

| 1 <sup>st</sup> author, year, country of origin | Title of Publication                                                                           | Study design                           | Keywords                                                                                                      | N  | Population characteristics                                                                                                                                                                                                                                                                                   | Treatment                                                                                                                                                                                                                                                                             | Outcomes                                                                                                                                                                                                                                                                                                     |
|-------------------------------------------------|------------------------------------------------------------------------------------------------|----------------------------------------|---------------------------------------------------------------------------------------------------------------|----|--------------------------------------------------------------------------------------------------------------------------------------------------------------------------------------------------------------------------------------------------------------------------------------------------------------|---------------------------------------------------------------------------------------------------------------------------------------------------------------------------------------------------------------------------------------------------------------------------------------|--------------------------------------------------------------------------------------------------------------------------------------------------------------------------------------------------------------------------------------------------------------------------------------------------------------|
| <b>CALCINEURIN-INHIBITOR</b>                    |                                                                                                |                                        |                                                                                                               |    |                                                                                                                                                                                                                                                                                                              |                                                                                                                                                                                                                                                                                       |                                                                                                                                                                                                                                                                                                              |
| Kemper 2004 [62] Germany                        | Recurrence of severe steroid dependency in cyclosporine A-treated childhood nephrotic syndrome | Retrospective chart analysis 3 centers | Childhood cyclosporin A<br>Long-term remission<br>Maintenance therapy<br>Steroid-dependent nephrotic syndrome | 46 | <b>Age at NS onset:</b> 3.0 (IQR 0.8-6.9) yrs<br><b>Age at CsA:</b> not stated<br><b>Duration of NS at CsA start:</b> 4.3 (0.9-12.9) yrs<br><b>Duration of CsA at recurrence of SDNS:</b> 5.1 (1.2-11.5)<br><b>Age at data analysis:</b> 20.4 (8.6-29.1) yrs<br><b>FU:</b><br><b>Indications:</b> SDNS after | <b>CsA:</b> 5 mg/kg/d aiming for trough levels 80-120 µg/l, in case of frequent relapses: 150-250 µg/l<br><b>Duration:</b><br><b>Other:</b> oral prednisone in tapering dose<br><b>After CsA:</b><br><b>CHL:</b> 0.15 mg/kg for 12 wks (n=6)<br><b>CPA:</b> 2mg/kg for 12 weeks (n=3) | <b>Recurrence of SDNS in CsA-treated patients:</b> 14/46 (30%) after duration of CsA treatment of 5.1 (1.2-11.5) yrs<br><b>6/14 with CHL:</b> 4 long-term remission, 1 SDNS then LEV, 1 SDNS then CsA again<br><b>3/14 with CPA:</b> 0 long-term remission (1 relapse after 15 mths, 1 SDNS with maintenance |

| 1 <sup>st</sup> author, year, country of origin | Title of Publication                                                                                         | Study design                                | Keywords                                                                                           | N                    | Population characteristics                                                                                                                                                                                                                                                         | Treatment                                                                                                                                                                                                                               | Outcomes                                                                                                                                                                                                                                                                                                                |
|-------------------------------------------------|--------------------------------------------------------------------------------------------------------------|---------------------------------------------|----------------------------------------------------------------------------------------------------|----------------------|------------------------------------------------------------------------------------------------------------------------------------------------------------------------------------------------------------------------------------------------------------------------------------|-----------------------------------------------------------------------------------------------------------------------------------------------------------------------------------------------------------------------------------------|-------------------------------------------------------------------------------------------------------------------------------------------------------------------------------------------------------------------------------------------------------------------------------------------------------------------------|
| lyengar A, 2004 [63]<br>India                   | Cyclosporine in Steroid dependent and resistant childhood nephrotic syndrome                                 | Retrospective single center study           | Chronic renal failure FSGS Minimal change nephrotic syndrome                                       | 41, 0 those 30 SDN S | <b>Age at NS onset:</b> 22 (11-148) mths<br><b>Age at Csa:</b> 93 (48-936) mths<br><b>Duration of NS before Csa:</b> 24 (6-72) mths<br><b>FU:</b> 71 (20-205) mths<br>30 M, 11 F<br><b>Indications:</b> SDNS (n=30), SRNS (n=11) despite prior treatment with cytotoxic treatments | <b>Csa:</b> 6-7 mg/kg/d in 2 divided doses, target levels 100-200 ng/ml, maintenance 3-4 mg/kg/day<br><b>Duration:</b> 24 (6-72) mths<br><b>Other:</b> oral steroids in tapering dose                                                   | <b>SDNS:</b><br><b>Csa responder:</b> 86.2%<br><b>Csa-non-responder:</b> 13.8%<br><b>RR:</b> not stated<br><b>Time to relapse:</b> not stated<br><b>AE:</b> infections 8/41, Chronic renal failure 7/41                                                                                                                 |
| El-Husseini 2005 [64]<br>Egypt                  | Long-term effects of cyclosporine in children with idiopathic nephrotic syndrome: a single-centre experience | Retrospective chart review<br>Single center | Cyclosporine Long-term Nephrotic syndrome Pathology treatment                                      | 74                   | <b>Age at NS onset:</b> not stated<br><b>Age at Csa:</b> 11 ± 3.6 yrs<br><b>FU:</b> 5.8 ± 3 yrs before Csa, 6.1 ± 1.9 yrs after Csa<br>M 54, F 20<br><b>Indications:</b> SDNS (N=74) with CPA previously (n=32, CPA-responsive 9/32) and/or steroid toxicity (n=32), SRNS (N=43)   | <b>Csa:</b> 5 mg/kg/d, adjusted to maintain trough levels 100-150 ng/ml for 2 mths, thereafter 50-100 ng/ml<br><b>Duration:</b> 34 ± 12 mths, maintenance dose 1.3 ± 0.8 mg/kg/d<br><b>Other:</b> prednisone on tapering dose           | <b>Remission:</b> 66 (82%)<br><b>Time to remission:</b> 4.4 ± 1.4 wks<br><b>Relapses:</b> 19/66 during pred. tapering or within 1 mth after stop of predn.<br><b>Time to relapse:</b> not stated<br><b>AE:</b> gym hyperplasia 25 (33.8%), hypertrichosis 51 (68.9%), hypertension 4 (5.4%), renal dysfunction 2 (2.7%) |
| Rinaldi 2005 [65]<br>Italy                      | Cyclosporine therapy monitored with abbreviated area under curve in nephrotic syndrome                       | Retrospective analysis                      | Cyclosporine monitoring abbreviated area under the curve Nephrotic syndrome Cyclosporine phropathy | 18                   | <b>Age at NS onset:</b> 4.7 (1.6-13.5) yrs<br><b>Age at Csa:</b> 7.8 (2.5-14.4) yrs<br><b>Duration of NS at start of Csa:</b> 3.3 (0.2-12.6) yrs<br><b>FU (after Csa discontinuation):</b> 2.3 (0.6-3.3 yrs)<br>12 M, 6 F<br><b>Indications:</b> SDNS (n=15)                       | <b>Csa:</b> 5 mg/kg/d divided into 2 doses, adjusting to maintain mean Csa blood concentration 250-350 ng/ml (obtained from abbreviated AUC: 2 and 6 hrs post-Csa); mean dose 4.4 (3.6-5.8) mg/kg/day<br><b>Duration:</b> 4.9 (2.2-6.9) | <b>RR:</b> decreased from 4/year to 0.8/yr (p<0.0001)<br><b>Time to relapse:</b><br><b>Predn.dose:</b> decreased from 0.9 mg/kg/day to 0.2 mg/kg/d (p<0.0001).<br><b>Csa Nephropathy (CsAN) in renal biopsy:</b> clear-lesions: none; Lesions suggestive of CsAN 5/15 -> Csa treatment was                              |

| 1 <sup>st</sup> author, year, country of origin                                | Title of Publication                                                                                                 | Study design                                | Keywords                                                                                         | N                     | Population characteristics                                                                                                                                                                                                                                   | Treatment                                                                                                                                                                                                                                                                                                            | Outcomes                                                                                                                                                                                                                                                                                                                                                                                                                                                                                      |
|--------------------------------------------------------------------------------|----------------------------------------------------------------------------------------------------------------------|---------------------------------------------|--------------------------------------------------------------------------------------------------|-----------------------|--------------------------------------------------------------------------------------------------------------------------------------------------------------------------------------------------------------------------------------------------------------|----------------------------------------------------------------------------------------------------------------------------------------------------------------------------------------------------------------------------------------------------------------------------------------------------------------------|-----------------------------------------------------------------------------------------------------------------------------------------------------------------------------------------------------------------------------------------------------------------------------------------------------------------------------------------------------------------------------------------------------------------------------------------------------------------------------------------------|
| Mahmoud I 2005 [66] Egypt                                                      | Single-centre experience with cyclosporine in 106 children with idiopathic focal segmental glomerulosclerosis        | Retrospective chart review<br>Single center | Cyclosporine<br>Focal segmental glomerulosclerosis                                               | 106, of those 61 SDNS | <b>Age at NS onset:</b> 5.8 ± 4.3 yrs<br><b>Age at CSA:</b> 10.5 ± 3 yrs<br><b>Duration of NS before CSA:</b> 5.8 ± 2.8 yrs<br><b>FU:</b> 6.1 ± 1.9 yrs after CSA start<br>44 M, 17 F<br><b>Indications:</b> SDNS (n=61) with prior CPA (29/61), SRNS (n=45) | <b>CSA:</b> 5 mg/kg/day in 3 divided doses, adjusted to trough levels 100-150 ng/ml for 2 mths; thereafter 50-100 ng/ml; maintenance dose 1.9 ± 0.9 mg/kg/d<br><b>Duration:</b> 22.6 ± 10 mths<br><b>Other:</b> oral steroids in tapering dose; 81/106 received ketoconazole                                         | discontinued<br><b>AE:</b> <b>CSA</b> N: see above; reversible gun hypertrophy (53%), reversible hypertichosis (31%), reversible hypertension (16%).<br><b>Remission:</b> 56/61 (91.8%)<br><b>Steroid withdrawal:</b> all 56 in remission, 13/56 with relapses<br><b>CSA discontinued:</b> 12/56, relapse in 11/12<br><b>RR:</b> not stated<br><b>Time to relapse:</b> not stated<br><b>AE:</b> hypertichosis 33/61 (54%), gun hyperplasia 15/61 (24%), hypertension 4/61 (6.6%), 2/61 (3.3%) |
| Wasilewska 2005 [67] Poland<br><br>Only abstract available (Article in Polish) | The effect of cyclosporine A in steroid-dependent nephrotic syndrome in children                                     | Retrospective analysis                      |                                                                                                  | 21                    | <b>Age at NS onset:</b><br><b>Age at CSA:</b> 12.1 ± 4.6 yrs<br><b>FU:</b> 12 months of CSA<br>16 M, 5 F<br><b>Indications:</b> SDNS                                                                                                                         | <b>CSA:</b><br><b>Duration:</b> 12 mths<br><b>Other:</b> oral steroids, ACEI                                                                                                                                                                                                                                         | Decrease of protein excretion.<br>Increase of serum creatinine.<br>Disturbs 24 hr rhythm of arterial blood pressure (nocturnal fall of systolic and diastolic BP decreased to < 10% from 14-15%)<br><b>Remission:</b><br><b>RR:</b><br><b>Time to relapse:</b><br><b>AE:</b>                                                                                                                                                                                                                  |
| El-Husseini 2006 [68] Egypt                                                    | Impact of the cyclosporine-ketoconazole interaction in children with steroid-dependent idiopathic nephrotic syndrome | Retrospective chart review<br>2 centers     | Ketoconazole<br>Cyclosporine<br>Children<br>Steroid-dependent<br>Nephrotic syndrome<br>Treatment | 102                   | <b>Ketoconazole group:</b> n=78<br><b>Non-ketoconazole group:</b> n=24<br><b>Age at NS onset:</b> not stated<br><b>Age at CSA:</b> 5.4 ± 3.6 yrs<br><b>FU:</b> not stated<br>77 M, 25 F<br><b>Indications:</b> SDNS                                          | <b>CSA:</b> 4-5 mg/kg/d in 2 divided doses (> 6 yrs); 5-6 mg/kg/d in 3 divided doses (<6 yrs), trough level target 100-150 ng/ml for 2 mths, thereafter 50-100 ng/ml<br><b>Ketoconazole:</b> 50 mg/day, accompanied with initial 1/3 decrease in CSA dose<br><b>Duration:</b> 23.72 ± 12.22 mths (Keto); 19.31±11.78 | <b>Remission:</b><br>Keto: 72/78 (92.3%)<br>Non-keto: 17/24 (70.8%)<br><b>Steroid withdrawal:</b><br>Keto: 58/72 (74.4%), all maintained remission<br>Non-keto: 11/24 (45.8%), 10 maintained remission<br><b>CSA discontinuation:</b><br>Keto: 19/72 while in remission, 18 with relapses<br>Non-Keto: 6/17 while in remission, 6 with relapses                                                                                                                                               |

| 1 <sup>st</sup> author, year, country of origin | Title of Publication                                                                                                                         | Study design              | Keywords                                                                                                        | N                       | Population characteristics                                                                                                                                                                                                                                           | Treatment                                                                                                                                                                                                                                                                                             | Outcomes                                                                                                                                                                                                                                                                                                                                                                                                                                                                    |
|-------------------------------------------------|----------------------------------------------------------------------------------------------------------------------------------------------|---------------------------|-----------------------------------------------------------------------------------------------------------------|-------------------------|----------------------------------------------------------------------------------------------------------------------------------------------------------------------------------------------------------------------------------------------------------------------|-------------------------------------------------------------------------------------------------------------------------------------------------------------------------------------------------------------------------------------------------------------------------------------------------------|-----------------------------------------------------------------------------------------------------------------------------------------------------------------------------------------------------------------------------------------------------------------------------------------------------------------------------------------------------------------------------------------------------------------------------------------------------------------------------|
| Sinha 2006 [69] UK                              | Treatment of severe steroid-dependent nephrotic syndrome (SDNS) in children with tacrolimus                                                  | Retrospective case series | Calcineurin inhibitors<br>Children<br>Cyclosporine<br>A. nephrotic syndrome<br>Steroid dependency<br>tacrolimus | 10                      | <b>Age at NS onset:</b> 2.9 (1.6-12.9) yrs<br><b>Age at TAC:</b> 10.9 (3.6-21.4) yrs<br><b>Age at Csa:</b> 4.9 (2.6-13.4) yrs<br><b>FU:</b> 8M, 2 F<br><b>Indications:</b> severe SDNS despite sequential treatment with CPA (10), Csa (10), 2 <sup>nd</sup> CPA (7) | <b>TAC (after failure of Csa or adverse effects on Csa):</b> 0.1 mg/kg/d in 2 divided doses, target trough level 5-10 µg/l.<br><b>Csa:</b> 5 mg/kg/d in 2 divided doses, target trough level 50-100 µg/l.<br><b>Duration:</b> TAC: 5 (1-7) yrs<br>Csa: 2 (1-7) yrs<br><b>Other:</b>                   | <b>Remission:</b> 6/10 on TAC<br><b>RR:</b> TAC: 1 (0-5)/yr; Csa 2 (0-6)/yr (p=0.79)<br><b>Time to relapse:</b> not stated<br><b>Cumulative steroid dosage:</b> TAC: 73.9 (2.1-468.9) vs. Csa: 105 (17.3-602.7) mg/kg/d (p=0.54)<br><b>% change in eGFR:</b> Tac: -11.7 (-34.3, +3.5), Csa -5.8 (-37.7, +38.3)<br><b>CNI toxicity (histology):</b> Tac: 1/13 (1pt), Csa: 3/16 (2 pts).<br><b>AE:</b> hypertension 7 (Csa, Tac), insulin-dependent diabetes mellitus 1 (Tac) |
| Sheashaa H 2007 [70] Egypt                      | Does cyclosporine achieve a real advantage for treatment of idiopathic nephrotic syndrome in children? A long-term efficacy and safety study | Retrospective analysis    | Nephrotic syndrome<br>Cyclosporine<br>Pediatric                                                                 | 197, of those 103 SDN S | <b>Age at NS onset:</b> 4 (1-13) yrs<br><b>Age at Csa:</b> 5 (1-12) yrs<br><b>FU:</b> SRNS (n=94), prior treatment with CPA n= 104 (53%)                                                                                                                             | <b>Csa:</b> 4-5 mg/kg/d in 2 divided doses (> 6 yrs); 5-6 mg/kg/d in 3 divided doses (<6 yrs), trough level target 100-150 ng/ml for 2 mths, thereafter 50-100 ng/ml<br><b>Duration:</b> 22.2 ± 12.3 mths<br><b>Other:</b> oral steroids in tapering dose, ketoconazole 50-100 mg/d to achieve target | <b>Remission:</b> 90/103 (87.4%)<br><b>RR:</b> not stated<br><b>Time to relapse:</b> not stated<br><b>AE</b> (all 197 pts): renal impairment 18 (9.1%), hypertension 37 (18.8%), gym hyperplasia 50 (25.4%), hypertrichosis 103 (52.3%), hyperkalemia 2 (1%), cholestasis 1 (0.5%), seizure 1 (0.5%)                                                                                                                                                                        |

| 1 <sup>st</sup> author, year, country of origin | Title of Publication                                                                                                       | Study design               | Keywords                                            | N  | Population characteristics                                                                                                                                                                                                                                                                                                                                                                                  | Treatment                                                                                                                                                                                                                                                                                            | Outcomes                                                                                                                                                                                                                                                                                                                                                                                                                                                                                                                                                  |
|-------------------------------------------------|----------------------------------------------------------------------------------------------------------------------------|----------------------------|-----------------------------------------------------|----|-------------------------------------------------------------------------------------------------------------------------------------------------------------------------------------------------------------------------------------------------------------------------------------------------------------------------------------------------------------------------------------------------------------|------------------------------------------------------------------------------------------------------------------------------------------------------------------------------------------------------------------------------------------------------------------------------------------------------|-----------------------------------------------------------------------------------------------------------------------------------------------------------------------------------------------------------------------------------------------------------------------------------------------------------------------------------------------------------------------------------------------------------------------------------------------------------------------------------------------------------------------------------------------------------|
| Kranz 2008 [71]<br>Germany                      | Cyclosporine-A-induced nephrotoxicity in children with minimal-change nephrotic syndrome: long-term treatment up to 10 yrs | Retrospective chart review | Minimal-change nephrotic syndrome<br>Cyclosporine A | 20 | <b>CSA (after CPA):</b> n=20<br><b>CPA-Controls:</b> n=15<br><b>Age at NS onset:</b> 4.4 ± 2.2 yrs (CSA), 4.0 ± 2.9 yrs (CPA)<br><b>Age at start of initial CPA:</b> 5.7 ± 2.2 yrs (CSA), 6.0 ± 3.2 yrs (CPA-Controls)<br><b>Age at start of CSA:</b> 8.4 ± 3.0 yrs<br><b>FU:</b> 5.4 ± 2.2 yrs (CSA), 4.9 ± 3.4 yrs (CPA-controls)<br>12M, 8 F<br><b>Indications:</b> SDNS, all treated with CPA prior CSA | <b>CSA:</b> 100-150 mg/m <sup>2</sup> BSA in 2 divided doses; target trough level 80-120 ng/ml<br><b>Duration:</b> 5.4 ± 2.2 yrs, 10 pts: 5-11 yrs<br><b>Other:</b> oral prednisone in tapering dose                                                                                                 | <b>Sustained Remission or reduction of relapses to an infrequent relapsing NS:</b> 19/20<br><b>RR:</b> not stated<br><b>CSA toxicity:</b> 5 renal biopsies performed without CSA toxicity<br><b>eGFR:</b> fell from 136.3 ± 10.0 at CSA start to 114.5 ± 14.5 ml/min*1.73m <sup>2</sup> at latest follow-up<br>eGFR at latest FU in CPA-controls 126.4 ± 19.8<br><b>AE:</b> hypertension 3/20 (CSA), otherwise not stated                                                                                                                                 |
| Kenjeng-Wato 2009 [72]<br>Italy                 | Risk Factors for Cyclosporin A Nephrotoxicity in Children with Steroid-Dependant nephrotic syndrome                        | Retrospective chart review | SDNS<br>Cyclosporin Nephrotoxicity<br>Children      | 53 | Evaluation of CsAN in 71 renal biopsies of 53 pts.<br><b>Age at NS onset:</b> 3.5 (0.7 to 13.2) yrs<br><b>Age at CSA:</b> 6.5 (2.2-14.2) yrs<br><b>Duration of NS before CSA:</b> 1.1 (0.4-11.2) yrs<br><b>Age at biopsy:</b> 11.5 (5.6-20.3) yrs<br><b>FU:</b> 36 M, 17 F<br><b>Indications:</b> SDNS on CSA                                                                                               | <b>CSA:</b> 4.2 ± 1.2 mg/kg/d or 125 ± 28 mg/m <sup>2</sup> /d; C2 levels 454 ± 122 ng/ml<br><b>Duration:</b> 4.7 ± 2.0 yrs before renal biopsy; total CSA 5.9 (2.9-12.5 yrs)<br><b>Other:</b> prednisone in tapering dose, amlodipine (15), ramipril or losartan (11), aldactone (3), labetalol (1) | <b>Relapse rate:</b> decreased from 2.0 ± 1.1 (range 1-6) to 0.5 ± 0.5 (range 0.0-3.0) (p<0.0001)<br><b>Steroid dose:</b> decreased from 11.6 (range 6.5-22.5) to 5.0 (0-15.5) mg/m <sup>2</sup> /d (p<0.0001).<br><b>CSAN:</b> 22/71 (31%)<br>Mild lesions: 17/22, 5/22 moderate, no severe lesions<br>Tubular/vascular lesions: Isolated: 11<br>Combined: 11<br><b>eGFR (Schwartz) change:</b> reduced by 10.2 ± 15.5 % from baseline, remained stable at biopsy: -7.3 ± 22.4% from baseline<br><b>Risk factors for CsAN:</b> CsA-C2-Levels > 600 ng/ml |
| Leroy V 2009 [73]<br>France                     | Growth in boys with idiopathic nephrotic                                                                                   | Retrospective analysis     | Growth retardation<br>Steroid                       | 64 | <b>Age at NS onset:</b> 2.7 (0.8-10.9) yrs<br><b>Age at CSA:</b> not stated                                                                                                                                                                                                                                                                                                                                 | <b>CSA:</b> 150 mg/m <sup>2</sup> /d in 2 divided doses, target trough level 100-150                                                                                                                                                                                                                 | <b>Remission:</b> not stated<br><b>RR:</b> not stated<br><b>Time to relapse:</b> not stated                                                                                                                                                                                                                                                                                                                                                                                                                                                               |

| 1 <sup>st</sup> author, year, country of origin | Title of Publication                                                                                            | Study design                  | Keywords                                                                                                                | N  | Population characteristics                                                                                                                                                                                                                                   | Treatment                                                                                                                                      | Outcomes                                                                                                                                                                                                                                                                                                                                                                                                                                                                                                                                                                                                                                                                                                                                                                                                                                                                             |
|-------------------------------------------------|-----------------------------------------------------------------------------------------------------------------|-------------------------------|-------------------------------------------------------------------------------------------------------------------------|----|--------------------------------------------------------------------------------------------------------------------------------------------------------------------------------------------------------------------------------------------------------------|------------------------------------------------------------------------------------------------------------------------------------------------|--------------------------------------------------------------------------------------------------------------------------------------------------------------------------------------------------------------------------------------------------------------------------------------------------------------------------------------------------------------------------------------------------------------------------------------------------------------------------------------------------------------------------------------------------------------------------------------------------------------------------------------------------------------------------------------------------------------------------------------------------------------------------------------------------------------------------------------------------------------------------------------|
| Suzuki K 2010 [74] Japan                        | Benefits of Once-Daily Administration of Cyclosporine A for Children with steroid-dependent, relapsing syndrome | Retrospective chart review    | Children Cyclosporine A Frequently relapsing nephrotic syndrome Single-daily dose administration Steroid-sparing effect | 19 | <p><b>Duration of NS before CsA:</b> 15 mths (1 mth to 14.8 yrs)<br/> <b>FU:</b> 10 (3-17) yrs, at least 3 yrs, all male<br/> <b>Indications:</b> SDNS with long-term combined CsA and steroid treatment; 46 with prior treatment with alkylating agents</p> | <p>ng/ml<br/> <b>Duration:</b> not stated<br/> <b>Other:</b> oral steroids in tapering dose/ low-dose Steroid exposure: 9.9 (2.6-16.4) yrs</p> | <p><b>AE:</b> growth retardation 17, otherwise not stated<br/> <b>Normal growth:</b> 47 (73.4%)<br/> Height-SDS at diagnosis: 0.4 (-1.7 to 1.8)<br/> H-SDS at last FU: -0.5 (-1.8 to 1.8)<br/> <b>Growth retardation:</b> 17 (26.6%)<br/> H-SDS at diagnosis: -0.4 (-3.0 to -0.9) (p&lt;0.01 compared to normal growth)<br/> H-SDS at last FU: -2.4 (-3.9 to 0.1) (p&lt;0.001 compared to normal growth)<br/> <b>Steroid exposure:</b> 9.2 (2.6-15.8) vs. 10.8 (4.0-16.4) yrs<br/> <b>Cum. Steroid dose over FU period:</b> 37.3 (14.2-95.4) vs. 55.3 (30.1-1000.0) mg/m<sup>2</sup><br/> <b>Sustained remission without medication:</b> SDD 3/10, TDD 3/9<br/> <b>Relapses:</b> SDD: 7/10. TDD 6/9<br/> <b>RR:</b> SDD: decreased from 4.7±2.0/yr to 0.5±0.2/yr<br/> TDD: decreased from 5.1±2.3/yr to 0.2±0.2/yr<br/> <b>AE:</b> mild biopsy-proven GsAN 1/9 (TDD), 0/10 (SDD)</p> |
| Ishikura 2010 [75] Japan                        | Treatment with microemulsified cyclosporine in                                                                  | Prospective multicenter trial | Clinical trial microemulsified                                                                                          | 62 | <p><b>Age at NS onset:</b> 3.0 (1.3-14.5) yrs<br/> <b>Age at CsA:</b> 5.4 (1.7-15.3) yrs despite prior CPA (n=12)</p>                                                                                                                                        | <p><b>CsA:</b> maintaining trough levels 80-100 ng/ml for 6 mths (mean dose 5.1</p>                                                            | <p><b>FRNS-free survival at 24 mths:</b> 58.1% (95% CI, 45.8-70.3%)<br/> <b>RR:</b> decreased from 4.6 ± 1.4 to</p>                                                                                                                                                                                                                                                                                                                                                                                                                                                                                                                                                                                                                                                                                                                                                                  |



| 1 <sup>st</sup> author, year, country of origin | Title of Publication                                                                                                       | Study design                                    | Keywords                                                                 | N                          | Population characteristics                                                                                                                                                   | Treatment                                                                                                                                                                                                     | Outcomes                                                                                                                                                                                                                                                                                                                                                                                                                                                                                                                                                                                                                                  |
|-------------------------------------------------|----------------------------------------------------------------------------------------------------------------------------|-------------------------------------------------|--------------------------------------------------------------------------|----------------------------|------------------------------------------------------------------------------------------------------------------------------------------------------------------------------|---------------------------------------------------------------------------------------------------------------------------------------------------------------------------------------------------------------|-------------------------------------------------------------------------------------------------------------------------------------------------------------------------------------------------------------------------------------------------------------------------------------------------------------------------------------------------------------------------------------------------------------------------------------------------------------------------------------------------------------------------------------------------------------------------------------------------------------------------------------------|
| Ishikura 2012 [76]<br>Japan                     | Two-year follow-up of a prospective clinical trial of cyclosporine for frequently relapsing nephrotic syndrome in children | Prospective follow-up analysis of Ishikura 2010 | cyclosporine<br>Nephrotic syndrome<br>Pediatric nephrology               | 46                         | FU study 24 mths after Csa discontinuation<br><br><b>Group A (n=32):</b> no relapses during initial Csa treatment<br><b>Group B (n=12):</b> with relapses during initial Csa | <b>Csa:</b> maintaining trough levels 80-100 ng/ml for 6 mths (mean dose 5.1 mg/kg/d), 60-80 ng/ml for 18 mths (4.5 mg/kg/d).<br><b>Duration:</b> 24 mths, tapered and stopped after 24 mths<br><b>Other:</b> | <b>Relapses:</b> 37/46<br>Group A: No relapse 6/32 (19%), infrequent relapses 9/32 (28%), regressed again to FRNS 17 (53%)<br>Group B: no relapse 1/12 (8.3%), infrequent relapses 2/12 (16.7%), regressed again to FRNS 9 (75%).<br><b>Time to relapse after Csa disc.:</b><br>Group A: 4.3 (1.5-15.6) mths;<br>group B: 0.5 (0.0-1.1) mths<br>Time to regression of FRNS:<br>Group A: 16.6 mths; group B: 3.8 mths<br><b>Relapse-free survival</b> at 24 mths after Csa discontinuation: 15.3%(all), 17.9%(group A), 8.3%(group B) (p<0.0001).<br><b>FRNS-free survival</b> 40.8%<br><b>AE:</b> 6/46 (GIT discomfort 3, hypertension 3) |
| Wang 2012 [77]<br>China                         | Treatment of Tacrolimus or cyclosporine A in children with idiopathic nephrotic syndrome                                   | Prospective single center study                 | Idiopathic nephrotic syndrome<br>Therapy<br>Cyclosporine A<br>Tacrolimus | 74 of those 40 SDN S/FR NS | <b>Csa:</b> n=24, of those FRNS/SDNS 16<br>TAC: 50, of those FRNS/SDNS 24<br><br><b>Age at NS onset:</b><br>Csa: 7.6 ± 4.5 yrs,                                              | <b>Csa:</b> 3-4 mg/kg/day, divided into 2 doses, dose adjustment to trough level, target 100-150 ng/ml; overall final dose: 2.72 ± 0.59 mg/kg/day                                                             | <b>Remission at 6 mths:</b><br>Csa: 14/16, TAC 22/24<br><b>Relapses within 1<sup>st</sup> year:</b><br>Csa: 4/14, 2/4 with >3/yr<br>TAC: 10/22, 5/10 with >3/yr<br><b>Relapses within 2<sup>nd</sup> year:</b><br>Csa: 6/14, 2/6 with > 3/yr                                                                                                                                                                                                                                                                                                                                                                                              |

| 1 <sup>st</sup> author, year, country of origin                | Title of Publication                                                                    | Study design                                    | Keywords                                                                           | N                    | Population characteristics                                                                                                                                                                                                   | Treatment                                                                                                                                                                             | Outcomes                                                                                                                                                                                                                                                                                                                                                                                              |
|----------------------------------------------------------------|-----------------------------------------------------------------------------------------|-------------------------------------------------|------------------------------------------------------------------------------------|----------------------|------------------------------------------------------------------------------------------------------------------------------------------------------------------------------------------------------------------------------|---------------------------------------------------------------------------------------------------------------------------------------------------------------------------------------|-------------------------------------------------------------------------------------------------------------------------------------------------------------------------------------------------------------------------------------------------------------------------------------------------------------------------------------------------------------------------------------------------------|
|                                                                |                                                                                         |                                                 |                                                                                    |                      | TAC: 8.3 ± 4.8 yrs<br><b>Age at CSA/TAC start:</b><br>CSA: 7.7 ± 5.0 yrs,<br>TAC: 8.6 ± 5.8 yrs<br><b>FU:</b> at least 24 mths,<br>51 M, 23 F<br><b>Indications:</b> SRNS, SDNS, FRNS, previous agents MMF (n=17), CPA (n=8) | <b>TAC:</b> 0.05-0.15 mg/kg/day, divided into 2 doses, target trough level 5-12 ng/ml; overall final dose 0.087±0.027 mg/kg/day<br><b>Duration:</b> at least 24 mths<br><b>Other:</b> | TAC: 12/22, 5/12 with >3yr<br><b>AE:</b><br>Nephrotoxicity: 4/24 (CSA) vs. 0/50 (Tac) (p=0.002); hirsutism: 8/24 (CSA) vs. 0/50 Tac (p<0.001).<br>ALT/AST elevation: 5/24 (CSA), 8/50 (TAC); GIT symptoms 5/24 (CSA), 11/50 (TAC), diabetes 0/24 (CSA), 1/50 (TAC); psychiatric symptoms 0/24 (CSA), 2/50 (TAC); severe infections 9/24 (CSA), 15/50 (TAC); nutritional anemia 0/24 (CSA); 2/50 (TAC) |
| Supavekin 2013 [78]<br>Thailand<br><br>Only abstract available | Tacrolimus in steroid resistant and steroid dependent childhood nephrotic syndrome      | Retrospective e chart analysis<br>Single center |                                                                                    | 18, of those 9 SDN S | <b>Age at NS onset:</b> 6.0 (1-14.4) yrs<br><b>Age at Tac:</b><br><b>Duration of NS before Tac:</b> 3.5 (0.2-14) yrs<br><b>FU:</b> 3.1 (0.2-6.4) yrs<br>12 M, 6 F<br><b>Indications:</b> SDNS (9), SRNS (9)                  | <b>Tac:</b> 0.09 (0.03-0.2) mg/kg/day with trough level 4.1 (1.3-9.9 mcg/l)<br><b>Duration:</b> 1.3 (0.3-6.2) yrs<br><b>Other:</b>                                                    | <b>Remission:</b> 9/9, 4/9 (44.4%) with relapses<br><b>RR:</b><br><b>Time to relapse:</b><br><b>AE:</b>                                                                                                                                                                                                                                                                                               |
| Bock ME 2013 [79]<br><br>Only abstract available               | Treatment of childhood nephrotic syndrome with long-term, low-dose tacrolimus           | Retrospective e chart review<br>Single center   |                                                                                    | 40                   | <b>Age at NS onset:</b><br><b>Age at Tac:</b><br><b>FU:</b><br><b>Indications:</b> SDNS, SRNS (not differentiated in abstract) despite prior second-line agents                                                              | <b>Tac:</b><br><b>Duration:</b> 25.2 (3-80) mths<br><b>Other:</b> oral steroids                                                                                                       | Not differentiated SDNS-SRNS:<br><b>Remission:</b> 26% (at 1 yr), 48% (at 2yrs), 29% (3yrs)<br><b>Time to remission:</b> 41 (10-270) days.<br><b>RR:</b> not stated<br><b>Time to relapse:</b><br><b>AE:</b>                                                                                                                                                                                          |
| Hamaseki 2017 [80]<br>Japan                                    | Nephrotoxicity in children with frequently relapsing nephrotic syndrome receiving long- | Retrospective e chart review<br>Single center   | Cyclosporine<br>Pediatrics<br>Nephrotic syndrome<br>Kidney biopsy<br>Nephrotoxicit | 36                   | <b>Renal biopsies</b> 33/36<br><b>Age at NS onset:</b> 3.6 (1.2-13.9) yrs<br><b>Age at CSA:</b> 9.4 (2.9-18.5) yrs<br><b>FU:</b> 28 M, 8 F                                                                                   | <b>CSA:</b><br>Trough level 80-100 ng/ml for 6 mths, 60-80 ng/ml for 18 mths, 50-60 ng/ml thereafter<br><b>Duration:</b> at least 3 yrs; 4.5 (3.0-11.9) yrs                           | <b>FRNS free survival rates:</b> 81% (at 2yrs), 27% (4 yrs)<br><b>Mild to moderate CSAN:</b> 13/36 (36.1%)<br><b>Risk factors of CSAN:</b><br>Duration of CSA treatment (2-5 yrs: OR 3.84 (95% CI. 0.79-18.74)                                                                                                                                                                                        |

| 1 <sup>st</sup> author, year, country of origin | Title of Publication                                                                                                                                                                            | Study design                                              | Keywords                                                                                  | N  | Population characteristics                                                                                                                                                                                                                                                                      | Treatment                                                                                                                                                                                                                                  | Outcomes                                                                                                                                                                                                                                                                                                                                                                                                            |
|-------------------------------------------------|-------------------------------------------------------------------------------------------------------------------------------------------------------------------------------------------------|-----------------------------------------------------------|-------------------------------------------------------------------------------------------|----|-------------------------------------------------------------------------------------------------------------------------------------------------------------------------------------------------------------------------------------------------------------------------------------------------|--------------------------------------------------------------------------------------------------------------------------------------------------------------------------------------------------------------------------------------------|---------------------------------------------------------------------------------------------------------------------------------------------------------------------------------------------------------------------------------------------------------------------------------------------------------------------------------------------------------------------------------------------------------------------|
| Kuroyanagi Y 2018 [81]<br>Japan                 | Effectiveness and nephrotoxicity of a 2-year medium dose of cyclosporine in pediatric patients with steroid-dependent nephrotic syndrome: determination of the need for follow-up kidney biopsy | Retrospective e analysis                                  | Childhood Cyclosporine A<br>Steroid-dependent nephrotic syndrome<br>Kidney biopsy         | 38 | <b>Age at NS onset:</b> 5.2 ± 2.9 yrs<br><b>Age at CSA:</b> 7.1 ± 3.5 yrs<br><b>Duration of NS before CSA:</b> 21.2 ± 23.7 mths<br><b>FU:</b> 2 yrs after CSA start<br>17 M, 21 F<br><b>Indications:</b> SDNS                                                                                   | <b>CSA:</b> 3-5 mg/kg/d (average: 3.6±0.9 mg/kg/d), adjusted to C2 target level of 450 ng/ml (average: 422 ± 133.5 ng/ml)<br><b>Duration:</b> 25.9 ± 2.5 mths<br><b>Other:</b> oral steroid in tapering dose, MMF (n=3), mizoribine (n=12) | <b>vs.</b> 0-2 yrs: > 5yrs 6.6 (1.18-36.94) vs. 0-2 yrs)<br><b>AE:</b> apart from CsAN not stated<br><b>Remission:</b><br><b>RR:</b> decreased from 3.0/yr to 0.47/yr<br><b>Time to relapse:</b> not stated<br>Steroid dose: decreased from 354.4 (204.6-438.9) mg/kg/yr to 48.9 (11.5-55.3) mg/kg/yr (p<0.01)<br><b>AE:</b> mild CsAN at 2yrs 1/38                                                                 |
| Yang 2019 [82]<br>Korea                         | Tacrolimus for children with refractory nephrotic syndrome: a one-year prospective, multicenter, and open-label study of Tacrobell®, a generic formula                                          | 1-yr prospective open-label, single-arm multicenter trial | Generic drugs<br>Nephrotic syndrome<br>tacrolimus                                         | 44 | <b>Age at NS onset:</b> 5.2 ± 3.5 yrs<br><b>Age at TAC:</b> 11.4 ± 4.2 yrs<br><b>Duration of NS before TAC:</b> 6.2 ± 3.7 yrs<br><b>FU:</b> 12 mths after TAC start<br>35 M, 9 F<br><b>Indications:</b> SDNS, previous agents: CPA 26, CsA 40, LEV 9, Bredinin 12, Azathioprine 2, MMF 1, RTX 1 | <b>TAC:</b> 0.1-0.2 mg/kg/d (Tacrobell®), trough level 5-10 ng/ml<br><b>Duration:</b> 12 mths<br><b>Other:</b> oral steroids in tapering dose                                                                                              | <b>Remission at 12 mths:</b> 34/44 (77.3%)<br><b>Sustained remission at 12 mths:</b> 19 (43.2%)<br><b>RR:</b> fell from 2.8± 1.3/yr to 0.9±1.0/yr<br><b>Time to relapse:</b> 4.6±2.9 mths<br><b>Cumulative steroid dose:</b> reduced from 139.7 ±151.9 mg/kg/yr to 102.2±120.8 mg/kg/yr<br><b>AE:</b> GIT symptoms 1/44, headache 2, dizziness 1, hand tremor 2, transient hyperglycemia 1, transient glycosuria 3. |
| Delbet 2019 [83]<br>France                      | Infrequent Tacrolimus-induced nephrotoxicity in French patients with steroid-dependent nephrotic                                                                                                | Retrospective e analysis<br>Single center                 | Idiopathic nephrotic syndrome<br>Tacrolimus<br>Children<br>Nephrotoxicity<br>Cyclosporine | 21 | <b>TAC:</b> n=15<br>CSA: n=6, of those 4 later TAC<br><b>Age at NS onset:</b> 49 (29-66) mths<br><b>Age at CNI:</b> 5.5 (3.6-10.8) yrs<br><b>Age at kidney biopsy:</b> 108 (78-170) mths<br><b>FU:</b>                                                                                          | <b>TAC:</b> 0.12 (0.10-0.19) mg/kg/day; trough level 5 (3.5-5.5) ng/ml<br><b>CSA:</b> 4.5 (4.25-4.75) mg/kg/day; trough level 116.5 (96.5-123.5) ng/ml<br><b>Duration:</b> >12 mths, median 30 (20-45) mths                                | <b>RR:</b> not stated<br><b>AE:</b><br>1/21 FSSGS<br>21/22 MCGN<br>Evaluation of chronic CNI nephrotoxicity: 1/21 (required high CsA doses, initially up tp 10                                                                                                                                                                                                                                                      |

| 1 <sup>st</sup> author, year, country of origin | Title of Publication                                                                                              | Study design                            | Keywords             | N  | Population characteristics                                                                                                                                   | Treatment                                                                                                                                                                           | Outcomes                                                                                                                                                                                                                                                                             |
|-------------------------------------------------|-------------------------------------------------------------------------------------------------------------------|-----------------------------------------|----------------------|----|--------------------------------------------------------------------------------------------------------------------------------------------------------------|-------------------------------------------------------------------------------------------------------------------------------------------------------------------------------------|--------------------------------------------------------------------------------------------------------------------------------------------------------------------------------------------------------------------------------------------------------------------------------------|
| Fujinaga S, 2021 [84]<br>Japan                  | Efficacy of once-daily cyclosporine in Japanese children with steroid-dependent minimal change nephrotic syndrome | Retrospective analysis<br>Single center | SDNS<br>cyclosporine | 30 | Age at NS onset: 6.6 (1.8-14.5) yrs<br>Age at CSA: 9.2 (3.1-15.8) yrs<br>FU:<br>26 M, 4 F<br>Indications: SDNS despite prior treatment MZR (10) and CPA (11) | CSA: single daily dose adjusted to C2 target level of 600 ng/ml; mean CSA dose: 2.6 ± 0.7 mg/kg/d to maintain C2 606±87 ng/ml<br>Duration:<br>Other: oral steroids in tapering dose | Responder: 20/30<br>Relapses: 11/20<br>RR: fell from 4.0/yr to 0.3/yr<br>Non-responder: 10/30, after switching to twice-daily CSA: 5/10 remained with treatment failure, requiring RTX<br>RR: not stated<br>Time to relapse:<br>AE: mild CSA-induced tubulointerstitial lesions 1/30 |

**Studies with CNL – comparing different steroid-sparing agents**

| <b>TAC vs. MMF</b>      |                                                                                                                                                       |                                 |                                                                               |    |                                                                                                                                                                                                                                                                                    |                                                                                                                                                                              |                                                                                                                                                                                                                                                                                                                                                                                                                                                                                                                                                                                                                                                                                                 |
|-------------------------|-------------------------------------------------------------------------------------------------------------------------------------------------------|---------------------------------|-------------------------------------------------------------------------------|----|------------------------------------------------------------------------------------------------------------------------------------------------------------------------------------------------------------------------------------------------------------------------------------|------------------------------------------------------------------------------------------------------------------------------------------------------------------------------|-------------------------------------------------------------------------------------------------------------------------------------------------------------------------------------------------------------------------------------------------------------------------------------------------------------------------------------------------------------------------------------------------------------------------------------------------------------------------------------------------------------------------------------------------------------------------------------------------------------------------------------------------------------------------------------------------|
| Wang 2016 [85]<br>China | Evaluation of mycophenolate mofetil or Tacrolimus in children with steroid sensitive but frequently relapsing or steroid-dependent nephrotic syndrome | Prospective single center study | Children<br>Mycophenolate mofetil<br>Primary nephrotic syndrome<br>tacrolimus | 72 | MMF Group: n=34, completed protocol n=30<br>TAC Group: n= 38, complete study protocol n=35<br>Age at NS onset: 43.1 ± 25.6 mths (MMF), 50.8 ± 31.1 mths (TAC)<br>Age at initiation: 64.2 ± 32.2 mths (MMF), 72.2 ± 32.3 mths (TAC)<br>FU:<br>51 M, 21 F<br>Indications: FRNS, SDNS | MMF: 20-30 mg/kg/d in 2 divided doses (max. 1g)<br>TAC: 0.05-0.15 mg/kg/d in 2 divided doses; trough levels 5-10 ng/ml<br>Duration: 12 mths<br>Other: low-dose oral steroids | Remission at 12 mths: MMF 24 (90%); TAC 31 (97%)<br>RR at 6 and 12 mths:<br>MMF: decreased from 2.56/6mths before MMF to 0.76/1 <sup>st</sup> 6 mths and 0.67/2 <sup>nd</sup> 6 mths (p<0.001)<br>TAC: decreased from 2.38/6mths to 0.41/ 1 <sup>st</sup> 6 mths and 0.42/ 2 <sup>nd</sup> 6 mths (p<0.001)<br>Steroid dose: decreased from 0.61 ± 0.06 mg/kg/d (MMF)/ 0.66 ± 0.05 mg/kg/d (TAC) to 0.16 ± 0.02 mg/kg/d (MMF)/ 0.17 ± 0.03 mg/kg/d.<br>AE: MMF discontinued due to leucopenia/GIT symptoms and chikhenpox 2/34; TAC discontinued due to severe infection/ refractory anemia 1 and neurologic symptoms 1/38; new onset of hypertension 2 (TAC).<br>Infections: 11.8% (MMF), 7.9% |

| 1 <sup>st</sup> author, year, country of origin | Title of Publication                                                                                                                                | Study design                       | Keywords                                                                                   | N  | Population characteristics                                                                                                                                                                                                                                                                                                  | Treatment                                                                                                                                                                                                                                                                                                                                                                                                                                                                       | Outcomes                                                                                                                                                                                                                                                                                                                                                                                                                                                                                                                                                                                                                                                                                                                                                                     |
|-------------------------------------------------|-----------------------------------------------------------------------------------------------------------------------------------------------------|------------------------------------|--------------------------------------------------------------------------------------------|----|-----------------------------------------------------------------------------------------------------------------------------------------------------------------------------------------------------------------------------------------------------------------------------------------------------------------------------|---------------------------------------------------------------------------------------------------------------------------------------------------------------------------------------------------------------------------------------------------------------------------------------------------------------------------------------------------------------------------------------------------------------------------------------------------------------------------------|------------------------------------------------------------------------------------------------------------------------------------------------------------------------------------------------------------------------------------------------------------------------------------------------------------------------------------------------------------------------------------------------------------------------------------------------------------------------------------------------------------------------------------------------------------------------------------------------------------------------------------------------------------------------------------------------------------------------------------------------------------------------------|
|                                                 |                                                                                                                                                     |                                    |                                                                                            |    |                                                                                                                                                                                                                                                                                                                             |                                                                                                                                                                                                                                                                                                                                                                                                                                                                                 | (TAC).<br>Reversible leucopenia (1 MMF, 1 TAC), acute kidney injury (1 MMF, no Tac)                                                                                                                                                                                                                                                                                                                                                                                                                                                                                                                                                                                                                                                                                          |
| <b>TAC vs. MMF – after RTX</b>                  |                                                                                                                                                     |                                    |                                                                                            |    |                                                                                                                                                                                                                                                                                                                             |                                                                                                                                                                                                                                                                                                                                                                                                                                                                                 |                                                                                                                                                                                                                                                                                                                                                                                                                                                                                                                                                                                                                                                                                                                                                                              |
| Fujinaga S 2013 [86]<br>Japan                   | Cyclosporine versus Mycophenolate mofetil for maintenance of remission of steroid-dependent nephrotic syndrome after a single infusion of rituximab | Prospective study<br>Single center | Cyclosporine<br>Mycophenolate mofetil<br>Rituximab<br>Steroid-dependent nephrotic syndrome | 29 | <b>CsA after RTX:</b> n=13<br><b>MMF after RTX:</b> n=16<br><br><b>Age at onset of NS:</b> 6.4 ± 3.9 yrs<br><b>Age at RTX:</b> 11.8 ± 4.3 yrs<br><b>FU:</b> 19M, 10 F<br><b>Indication:</b> severe SDNS despite CsA (for 49±35 mths) and/or MMF<br>Immunosuppr. agents at RTX: CsA 13, MMF 11, CsA and MMF 4, CsA and MZR 1 | <b>RTX:</b> Single dose of 375 mg/m <sup>2</sup> (max: 500 mg)<br><b>Duration of B-cell depletion:</b> 5 mths<br><br><b>After RTX:</b><br><b>CsA group:</b> dose adjusted to C2 level of 400-500 ng/ml; mean dose 3.7 mg/kg/d. MMF and MZR discontinued.<br><b>Duration after RTX:</b> 18 (5-29) mths<br><b>MMF group:</b> adjusted to target MPA levels of 2-5 µg/ml. CsA discontinued<br><b>Duration after RTX:</b> 19 (7-44) mths<br><b>Other:</b> Tapering dose of steroids | <b>Relapse after RTX:</b><br>CsA: 3/13<br>MMF: 12/16<br><b>Treatment failure:</b><br>CsA: 2/13<br>MMF: 7/16<br><br><b>RR:</b><br>CsA: decrease from 4.4 ± 1.9 to 0.6±1.4/yr (86%, p<0.01)<br>MMF: decrease from 2.3±0.8 to 1.0/±0.9yr (58%; p<0.01)<br><br><b>Steroid dose:</b><br>CsA: decrease from 0.35±0.16 to 0.057±0.14 mg/kg/day (p<0.01)<br>MMF: decrease from 0.38±0.26 to 0.15±0.21 mg/kg/d (p<0.01)<br><br><b>Dose of agent after RTX:</b><br>CsA: decrease from 4.6 to 3.7 mg/kg/d (21%, p<0.01).<br>MMF:<br><br><b>AE:</b><br>RTX: transient infusion reaction: 13/29 (45%),<br>CsA. Hypertrichosis all. Mild CSAN 3<br>MMF: diarrhea 2, bacterial pneumonia 1<br><br><b>Remission</b> despite CsA withdrawal: 11/26 (42%)<br><b>MMF Failure and RTX:</b> 11/26 |
| Fujinaga S 2015 [87]<br>Japan                   | Positive role of rituximab in switching from                                                                                                        | Prospective study<br>Single center | SDNS<br>Rituximab<br>Cyclosporine                                                          | 26 | <b>Age at NS onset:</b> 7.0 ± 4.0 yrs<br><b>Age at CsA:</b> 8.3 ± 4.1 yrs                                                                                                                                                                                                                                                   | <b>MMF</b> started at initial dose 250 mg/12h, akdusted to MPA trough                                                                                                                                                                                                                                                                                                                                                                                                           |                                                                                                                                                                                                                                                                                                                                                                                                                                                                                                                                                                                                                                                                                                                                                                              |

| 1 <sup>st</sup> author, year, country of origin | Title of Publication                                                                                                         | Study design               | Keywords                                                                                          | N                         | Population characteristics                                                                                                                                                                                                      | Treatment                                                                                                                                                                                                                                                                                                                                           | Outcomes                                                                                                                                                                                                                                                                                                                                                                                                                                                         |
|-------------------------------------------------|------------------------------------------------------------------------------------------------------------------------------|----------------------------|---------------------------------------------------------------------------------------------------|---------------------------|---------------------------------------------------------------------------------------------------------------------------------------------------------------------------------------------------------------------------------|-----------------------------------------------------------------------------------------------------------------------------------------------------------------------------------------------------------------------------------------------------------------------------------------------------------------------------------------------------|------------------------------------------------------------------------------------------------------------------------------------------------------------------------------------------------------------------------------------------------------------------------------------------------------------------------------------------------------------------------------------------------------------------------------------------------------------------|
|                                                 | cyclosporine to mycophenolate mofetil for children with high-dose steroid-dependent nephrotic syndrome                       |                            | MMF                                                                                               |                           | <b>Age at MMF:</b> 12.1 ± 4.0 yrs<br><b>FU:</b> after MMF start: 28.8 ± 9.9 mths<br>16M, 10F<br><b>Indication:</b> complicated SDNS despite CsA (for 46.5±27.2 mths), CsAN in 11 pts (42%) with CsA > 24 mths                   | level of 2-5 µg/ml (max. 1g bd).<br>After MMF start: CsA dosage gradually tapered<br>Duration:<br>Other: tapering dose of steroids, steroids for relapses.<br><b>In case of MMF treatment failure: RTX</b> (n=11): single dose of 375 mg/m <sup>2</sup> (max. 500 mg)<br><b>Duration:</b><br>Other: tapering dose of steroids, steroids for relapse | (42%)<br><b>Sustained remission &gt; 1 yr</b> without steroids: 22/26 (85%)<br><b>Discontinuation of MMF:</b> 15/26 (58%)<br><b>RR:</b> with CsA: 1.0±0.9/yr; with MMF and RTX 0.7±0.5/yr (p=0.07)<br><b>AE:</b> MMF: mild gastrointestinal symptoms 2, herpes simplex 2<br>RTX: mild infusion reactions 5/11, late-onset neutropenia requiring G-CSF 1/11                                                                                                       |
| <b>CsA vs. CPA</b>                              |                                                                                                                              |                            |                                                                                                   |                           |                                                                                                                                                                                                                                 |                                                                                                                                                                                                                                                                                                                                                     |                                                                                                                                                                                                                                                                                                                                                                                                                                                                  |
| Sümeği 2008 [88]<br>Hungary                     | Long-term follow-up after cyclophosphamide and cyclosporine-A therapy in steroid-dependent and –resistant nephrotic syndrome | Retrospective study        | Cyclosporine A, cyclophosphamide, immunosuppressive therapy, steroid resistant, steroid dependent | 37, of those SDNS<br>S 23 | <b>CPA:</b> n=22, of those SDNS n=15<br><b>CsA:</b> n=15, of those SDNS n=8<br><b>Age at NS onset:</b><br>CPA: 7.7 ± 3.8 yrs<br>CsA: 9.5 ± 4.7 yrs<br><b>FU:</b> 7.1 (5-13) yrs<br>25 M, 12 F<br><b>Indications:</b> SDNS, SRNS | <b>CPA:</b> 2-2.5 mg/kg/d<br>Duration: 2.5 ± 0.5 mths<br><b>CsA:</b> 3-5 mg/kg/day, trough levels 100-200 ng/ml<br><b>Duration:</b> 28 ± 15 mths<br><b>Other:</b> oral steroids in tapering dose                                                                                                                                                    | <b>Remission at 5 yrs:</b><br>CPA: 20/22 (90.9%)<br>CsA: 10/15 (66.6%)<br><b>RR:</b> decreased in both groups:<br>CPA: from 3.4±2.8/yr to 0.1±0.2/yr<br>CsA: from 3.7±3.1 to 0.6±0.8/yr<br><b>Time to relapse:</b><br>CPA: 29.9 ± 21.5 mths vs. CsA: 28.1 ± 22.4 mths<br><b>AE:</b><br>CPA: nausea 3/22, reversible hair loss 2/22, leucopenia 1/22, alopecia 1/22<br>CsA: hirsutism 3/15, tremor 2/15, gingival hyperplasia 2/15, nausea and appetite loss 1/15 |
| <b>CsA – CPA - LEV</b>                          |                                                                                                                              |                            |                                                                                                   |                           |                                                                                                                                                                                                                                 |                                                                                                                                                                                                                                                                                                                                                     |                                                                                                                                                                                                                                                                                                                                                                                                                                                                  |
| Abeyagunawardena 2003 [89]                      | The use of steroid-sparing agents in steroid-                                                                                | Retrospective cohort study | Nephrotic syndrome<br>Steroid                                                                     |                           | <b>CPA:</b> n=178 (1 <sup>st</sup> agent)<br><b>LEV:</b> n=113, of those 1 <sup>st</sup> agent n=65                                                                                                                             | <b>CPA:</b> 3 mg/kg daily<br><b>Duration:</b> 8 wks                                                                                                                                                                                                                                                                                                 | <b>CPA:</b> sustained remission at 1 yr: 94/178 (54%), at 2 yrs: 44%, at 5 yrs: 32%, 2 <sup>nd</sup> course of CPA:                                                                                                                                                                                                                                                                                                                                              |

| 1 <sup>st</sup> author, year, country of origin | Title of Publication                                                                     | Study design                      | Keywords                                                      | N                       | Population characteristics                                                                                                                                                                                                                                                                                    | Treatment                                                                                                                                                                                                                                                           | Outcomes                                                                                                                                                                                                                                                                                                                                                                                                                                                                                                                                                                                              |
|-------------------------------------------------|------------------------------------------------------------------------------------------|-----------------------------------|---------------------------------------------------------------|-------------------------|---------------------------------------------------------------------------------------------------------------------------------------------------------------------------------------------------------------------------------------------------------------------------------------------------------------|---------------------------------------------------------------------------------------------------------------------------------------------------------------------------------------------------------------------------------------------------------------------|-------------------------------------------------------------------------------------------------------------------------------------------------------------------------------------------------------------------------------------------------------------------------------------------------------------------------------------------------------------------------------------------------------------------------------------------------------------------------------------------------------------------------------------------------------------------------------------------------------|
| UK                                              | sensitive nephrotic syndrome                                                             |                                   | sensitive Corticosteroid<br>Relapse Remission Steroid-sparing |                         | <b>CsA:</b> n=61 as 2 <sup>nd</sup> agent in SDNS following CPA treatment; 1 <sup>st</sup> agent n=8<br><b>Chlorambucil:</b> n=15 when other therapies failed<br><b>Age at NS onset:</b> not stated<br><b>FU:</b> 6.1 yrs (IQR 1-17.4) yrs<br><b>Indications:</b> SDNS, FRNS                                  | <b>LEV:</b> 2.5 mg/kg on alternate days<br><b>Duration:</b> 3.2 (1-7) yrs<br><b>CsA:</b> 3.5 mg/kg in 2 divided doses (12htrough level 50-150 µg/l)<br><b>Other:</b> all: oral steroids in tapering dose                                                            | 18/178 (10%)<br><b>LEV:</b> sustained remission at 1 yr 19/65 (30%) as 1 <sup>st</sup> agent, relapse after stop of LEV 4. 32/48 (66%) with sustained remission when used after unsuccessful CPA<br><b>CsA:</b> 43/61 (70%) with sustained remission; relapse following discontinuation 32 (51%).<br><b>CHL:</b> sustained remission at 1 yr: 7.<br><b>AE:</b><br><b>CPA:</b> neutropenia 16/178, requiring Interruption of med., serious infection 4/178<br><b>LEV:</b> reversible neutropenia 4, skin rash 2 (requiring end of treatment)<br><b>CsA:</b> nephrotoxicity 4<br><b>CHL:</b> not stated |
| Chen SY 2010 [90]<br>Taiwan                     | Treatment course of steroid-dependent nephrotic syndrome: emphasized on treatment effect | Retrospective single center study | Chlorambucil<br>Cyclophosphamide<br>Cyclosporine<br>Levamisol | Total 46,<br>LEV:1<br>5 | <b>LEV:</b> n=15<br><b>CHL:</b> n=22<br><b>CsA:</b> n=8<br><b>2<sup>nd</sup> CPA:</b> n=6<br><b>Age at NS onset:</b> 4.5 (1-15.5) yrs<br><b>Age at medication:</b> not stated<br><b>FU:</b> 96 (22-244) mths<br>33M, 13 F<br><b>Indications:</b> SDNS despite one course of CPA as 1 <sup>st</sup> line agent | <b>LEV:</b> 2-3.3 mg/kg/day for 3-20 mths<br><b>CHL:</b> 0.1-0.2 mg/kg/d for 8 weeks<br><b>CsA:</b> 3.5-5 mg/kg/d for 6-14 mths, then tapering for 12-23 mths<br><b>2<sup>nd</sup> CPA:</b> 2-3 mg/kg/day for 8 wks<br><b>Other:</b> oral steroids in tapering dose | <b>Relapses after 1<sup>st</sup> CPA course:</b> 25/46<br><b>Relapses after additional treatment:</b><br>LEV: 1/15 remission, 1 with SSNS relapses, 1 relapse-free period, 1 LEV dependency, 10 no response<br>CHL: 7/22 complete remission, 5 with relapses, 4 disease-free for 6.8 (2-11) mths, 3 no response<br>CsA: 1/8 rem., 1 with SSNS relapses, 1 disease-free period, 4 CsA dependency<br>2 <sup>nd</sup> CPA: 3/6 disease-free period, 1 decreased steroid threshold, 2 no response<br><b>AE:</b> not stated                                                                                |
| <b>TAC – LEV - MMF</b>                          |                                                                                          |                                   |                                                               |                         |                                                                                                                                                                                                                                                                                                               |                                                                                                                                                                                                                                                                     |                                                                                                                                                                                                                                                                                                                                                                                                                                                                                                                                                                                                       |
| Basu B [91]                                     | Long-term efficacy                                                                       | Retrospective                     | Nephrotic                                                     | Total                   | <b>LEV:</b> n=129                                                                                                                                                                                                                                                                                             | <b>LEV:</b> 2.5 mg/kg on                                                                                                                                                                                                                                            | <b>Change in relapse rate at 12</b>                                                                                                                                                                                                                                                                                                                                                                                                                                                                                                                                                                   |

| 1 <sup>st</sup> author, year, country of origin | Title of Publication                                                         | Study design   | Keywords                                                     | N                 | Population characteristics                                                                                                                                                                                                                                                                                                                                                                                                                                                                                                                                                                                                                                      | Treatment                                                                                                                                                                                                                                                                    | Outcomes                                                                                                                                                                                                                                                                                                                                                                                                                                                                                                                                                                                                                                                                                                                                                                                                                                                                                                                                                                                                                                                          |
|-------------------------------------------------|------------------------------------------------------------------------------|----------------|--------------------------------------------------------------|-------------------|-----------------------------------------------------------------------------------------------------------------------------------------------------------------------------------------------------------------------------------------------------------------------------------------------------------------------------------------------------------------------------------------------------------------------------------------------------------------------------------------------------------------------------------------------------------------------------------------------------------------------------------------------------------------|------------------------------------------------------------------------------------------------------------------------------------------------------------------------------------------------------------------------------------------------------------------------------|-------------------------------------------------------------------------------------------------------------------------------------------------------------------------------------------------------------------------------------------------------------------------------------------------------------------------------------------------------------------------------------------------------------------------------------------------------------------------------------------------------------------------------------------------------------------------------------------------------------------------------------------------------------------------------------------------------------------------------------------------------------------------------------------------------------------------------------------------------------------------------------------------------------------------------------------------------------------------------------------------------------------------------------------------------------------|
| 2017<br>India                                   | and safety of common steroid sparing agents in idiopathic nephrotic syndrome | e cohort study | Syndrome<br>Mycophenolate mofetil<br>Levamisol<br>Tacrolimus | 340,<br>TAC<br>81 | <p><b>Age at NS onset:</b> 76.8 ± 32.0 mths</p> <p><b>Age at LEV:</b> not stated</p> <p><b>Duration of NS:</b> 3.3 ± 2.1 yrs</p> <p><b>FRNS/SDNS:</b> 78/51</p> <p><b>MMF:</b> n=130</p> <p><b>Age at NS onset:</b> 85.2 ± 28.8 mths</p> <p><b>Duration of NS:</b> 3.4 ± 2.6 yrs</p> <p><b>FRNS/SDNS:</b> 74/56</p> <p><b>TAC:</b> n=81</p> <p><b>Age at NS onset:</b> 79.2 ± 26.2 mths</p> <p><b>Duration of NS:</b> 3.1 ± 1.6 yrs</p> <p><b>FRNS/SDNS:</b> 47/34</p> <p><b>FU:</b> at least 30 mths</p> <p>210M, 130F</p> <p><b>Indications:</b> SDNS (preferred MMF or TAC), FRNS (preferred LEV or MMF), no previous exposure to steroid-sparing agents</p> | <p>alternate days</p> <p>Or</p> <p>MMF: 1200 mg/m<sup>2</sup> daily</p> <p>Or</p> <p>Tacrolimus 0.1-0.2 mg/kg/d</p> <p><b>Duration:</b> steroid-sparing agent continued for 1 yr following complete stop of steroids</p> <p><b>Other:</b> oral steroids in tapering dose</p> | <p><b>mths from previous year:</b></p> <p>LEV: -3.1 ± 1.1</p> <p>MMF: -4.5 ± 1.3</p> <p>TAC: -5.1 ± 1.3</p> <p>All p&lt;0.001 relative to pre-study period.</p> <p><b>RR at 12 mths and 24 mths (after stop of agent)</b></p> <p>LEV: 1.7/yr; 2.8/yr</p> <p>MMF: 0.9/yr; 1.4/yr</p> <p>TAC: 0.9/yr; 1.8/yr</p> <p><b>Relapse-free survival at 30 mths:</b></p> <p>TAC vs. MMF: 61.7 vs. 38.5%, p&lt;0.001</p> <p>TAC vs. LEV: 61.7% vs. 24%, p&lt;0.0001</p> <p><b>Time to relapse:</b></p> <p>LEV: 21 days</p> <p>MMF: 23 days</p> <p>TAC: 26 days</p> <p><b>Cumulative predn. dose at 12 mths:</b></p> <p>TAC vs MMF and LEV: 82.7 ± 26.4 mg/kg/yr vs. 136.8±65.4 mg/kg/yr and 108.8 ± 35.7 mg/kg/yr (p&lt;0.001)</p> <p><b>Cum. pred. dose between 18-30 mths:</b></p> <p>MMF vs. TAC and LEV: 74.4 mg/kg/yr vs. 96.4 mg/kg/yr (p=0.004); 74.4 vs. 117.6 mg/kg/yr (p&lt;0.001).</p> <p><b>Predictors for relapse:</b></p> <p>SDNS vs. FRNS: HR 2.14 (95% CI 1.79-2.96, p&lt;0.001)</p> <p><b>AE:</b></p> <p>LEV (n=3): malaria 1, transient mood changes 2</p> |



| 1 <sup>st</sup> author, year, country of origin | Title of Publication                                                                                               | Study design         | Keywords                                                                                                                                    | N   | Population characteristics                                                                                                                                                                                                                                                                                                                               | Treatment                                                                                                                                                                                                                                                                                                             | Outcomes                                                                                                                                                                                                                                                                                                                                                                                                                                                                                                                                    |
|-------------------------------------------------|--------------------------------------------------------------------------------------------------------------------|----------------------|---------------------------------------------------------------------------------------------------------------------------------------------|-----|----------------------------------------------------------------------------------------------------------------------------------------------------------------------------------------------------------------------------------------------------------------------------------------------------------------------------------------------------------|-----------------------------------------------------------------------------------------------------------------------------------------------------------------------------------------------------------------------------------------------------------------------------------------------------------------------|---------------------------------------------------------------------------------------------------------------------------------------------------------------------------------------------------------------------------------------------------------------------------------------------------------------------------------------------------------------------------------------------------------------------------------------------------------------------------------------------------------------------------------------------|
| <b>CsA/Tac – CPA – LEV - MMF</b>                |                                                                                                                    |                      |                                                                                                                                             |     |                                                                                                                                                                                                                                                                                                                                                          |                                                                                                                                                                                                                                                                                                                       |                                                                                                                                                                                                                                                                                                                                                                                                                                                                                                                                             |
| Moorani 2019 [92]<br>Pakistan                   | Immunosuppressive therapy in children with primary nephrotic syndrome: single center experience, Karachi, Pakistan | Retrospective review | Nephrotic syndrome<br>Minimal change disease<br>Oral prednisolone<br>Levamisole<br>Cyclophosphamide<br>Cyclosporin<br>Mycophenolate mofetil | 130 | <p><b>CPA:</b> n=90<br/><b>CsA:</b> n=88<br/><b>LEV:</b> n=55<br/><b>MMF:</b> n=39<br/><b>CsA+MMF:</b> n=20<br/><b>TAC+/-MMF:</b> n=11</p> <p><b>Age at NS onset:</b> 4.78 ± 3.23 yrs</p> <p><b>Age at medication:</b> not stated</p> <p><b>FU:</b> not stated, at least 6 mths</p> <p><b>Indication:</b> SDNS (n=55), FRNS (n=75), steroid toxicity</p> | <p><b>Sequential use:</b><br/><b>CPA:</b> 2-3 mg/kg/d for 8-12 wks (2<sup>nd</sup> line)<br/><b>CNI:</b> (3<sup>rd</sup> line), dose not stated<br/><b>LEV:</b> 2-2.5 mg/kg on a.d. for 6-24 mths (1<sup>st</sup> line)<br/><b>MMF:</b> (3<sup>rd</sup> line); dose not stated</p> <p><b>Other:</b> oral steroids</p> | <p><b>Remission (complete; partial) at 6 mths:</b><br/>CPA: 45/90; 13/90<br/>CsA: 30/88; 18/88<br/>LEV: effective 44/55<br/>MMF: 4/39; 16/39<br/>CsA+MMF: 4/20; 7/20, CsA dependent 9/20</p> <p><b>Outcome last FU:</b><br/>Compl. Rem. Off treatment: 65/130<br/>Compl. Rem. ON treatment: 34/130<br/>Partial rem. ON treatment: 12/130</p> <p><b>AE:</b><br/>CPA: severe infection (disseminated chicken pox 9, BMS 5, alopecia 3)<br/>CsA: gum hyperplasia 5, hypertrichosis 6, renal dysfunction</p>                                    |
|                                                 |                                                                                                                    |                      |                                                                                                                                             |     |                                                                                                                                                                                                                                                                                                                                                          |                                                                                                                                                                                                                                                                                                                       | <p>MMF (n=15): minor, temporary reduction of dose 3, acute resp. infec. 3, UTI 1, acute hepatitis 1, abdominal chronic pain 2, rec. vomiting 1, raised liver enzymes 1, muscle pain 1<br/>TAC (n=33): temporary drug discontinuation 8, complete drug stop: 1<br/>SAE: gram-pos. pneumonia with admission 2, gram-neg. peritonitis 1, pancreatitis 1<br/>Minor: 5 acute resp. inf., gastroenteritis 4, UTI 2, herpes simplex 1, abscess 2, stomatitis 2, convulsion 1, alopecia 2, hirsutism 1, eczema 2, hyperglycemia 3, leukopenia 2</p> |

| 1 <sup>st</sup> author,<br>year,<br>country of<br>origin | Title of<br>Publication | Study<br>design | Keywords | N | Population characteristics | Treatment | Outcomes                                                              |
|----------------------------------------------------------|-------------------------|-----------------|----------|---|----------------------------|-----------|-----------------------------------------------------------------------|
|                                                          |                         |                 |          |   |                            |           | 7, deafness 1<br>LEV: pancytopenia 1, allergic rash<br>1<br>MMF: none |

**Table S8.2: Alkylating agents - Cyclophosphamide/ Chlorambucil**

| 1 <sup>st</sup> author, year, [Ref.], country of origin               | Title of Publication                                                                           | Study design                                                 | Key words                                     | N   | Population Characteristics                                                                                                                                                                                               | Treatment                                                                                                                          | Outcomes                                                                                                                                                                                                                                                                                                                                                                                                                                                                                                                                                                                                                                            |
|-----------------------------------------------------------------------|------------------------------------------------------------------------------------------------|--------------------------------------------------------------|-----------------------------------------------|-----|--------------------------------------------------------------------------------------------------------------------------------------------------------------------------------------------------------------------------|------------------------------------------------------------------------------------------------------------------------------------|-----------------------------------------------------------------------------------------------------------------------------------------------------------------------------------------------------------------------------------------------------------------------------------------------------------------------------------------------------------------------------------------------------------------------------------------------------------------------------------------------------------------------------------------------------------------------------------------------------------------------------------------------------|
| <b>ALKYLATING AGENTS – Cyclophosphamide (CPA)/ Chlorambucil (CHL)</b> |                                                                                                |                                                              |                                               |     |                                                                                                                                                                                                                          |                                                                                                                                    |                                                                                                                                                                                                                                                                                                                                                                                                                                                                                                                                                                                                                                                     |
| Latta 2001 [93]<br>Germany                                            | A meta-analysis of cytotoxic treatment for frequently relapsing nephrotic syndrome in children | Meta-analysis of observational studies of efficacy and harms | NS<br>FRNS<br>SDNS<br>CYC<br>CHL<br>AE        | 866 | 38 articles on Rx of 866 pts given CYC (902 courses) and 638 given CHL (671 courses). Includes all articles published between 1960 & 2000.<br>65 articles on AE<br>AE: 38 articles; 1504 pts; 1573 courses of CYC or CHL | Protocols varied. Most started CYC or CHL after remission with Pred. Cumulative doses: CYC 105 - 588 mg/kg<br>CHL 5.6 – 32.8 mg/kg | <b>Remission rates</b> 0% at 12 mths to 90% at 5 yrs with CYC/CHL<br><b>Overall relapse-free survival</b> 50% after 4 yrs with CPA/CHL<br>FRNS: 72% at 2 yrs; 36% at 5 yrs<br>SDNS: 40% at 2 yrs; 24% at 5 yrs<br><b>AE: CYC:</b> Death 0.8%, hair loss 17.8%, low WBC 32.4%, low PLTs 2.1%, Infections 1.5%, Malignancies 0.2%, haemorrhagic cystitis 2.2%<br><b>AE: CHL:</b> Death 1.1%, hair loss 2.1%, Low WBC 33%, low PLTs 5.9%, Infections 6.3%, malignancies 0.6%, seizures 3.4%, haemorrhagic cystitis 0%<br>Total dose & duration negatively correlated with sperm count.<br>Avoid repeat courses CYC & dose >17 & total dose > 168 mg/kg |
| Vester 2003 [94]<br>Germany                                           | Cyclophosphamide in steroid sensitive nephrotic syndrome: outcome and outlook                  | Retrospective single centre study                            | NS<br>MCD<br>FRNS<br>SDNS<br>CYC<br>Remission | 106 | <b>Age at NS onset:</b><br>5.3±3.2yrs<br><b>Age at CYC:</b> 7.3±3.8yrs<br>FU: 5.9±4.8yrs<br>71M;35F<br><b>Indication:</b> FRNS, SDNS, No prior therapy with cytotoxics;                                                  | CYC dose: 2.0±0.2 mg/kg/d; cumulative dose 165±33 mg/kg; duration 83±15 days<br>Pred: QOD tapered                                  | <b>Sustained remission:</b><br>1 yr: 44%<br>2 yr: 34%<br>10 yr: 24%<br><b>FRNS:</b> 54% at 5 yr<br><b>SDNS:</b> 17% at 5 yr<br><b>Age</b> < 5.5 yrs 80% relapsed in 1 yr<br>No diff in % sustained remission with total dose < or > 168 mg/kg<br>BUT 45% who received >5040 mg/m <sup>2</sup> vs 11% who received <5040 mg/m <sup>2</sup> remained in remission.<br>Those with WBC < 3000, more                                                                                                                                                                                                                                                     |

| 1 <sup>st</sup> author, year, [Ref.], country of origin | Title of Publication                                                                                                                            | Study design                      | Key words                                     | N  | Population Characteristics                                                                                                                                                                                                            | Treatment                                                                                                                                                | Outcomes                                                                                                                                                                                                                                                                                                                                                                                                                                 |
|---------------------------------------------------------|-------------------------------------------------------------------------------------------------------------------------------------------------|-----------------------------------|-----------------------------------------------|----|---------------------------------------------------------------------------------------------------------------------------------------------------------------------------------------------------------------------------------------|----------------------------------------------------------------------------------------------------------------------------------------------------------|------------------------------------------------------------------------------------------------------------------------------------------------------------------------------------------------------------------------------------------------------------------------------------------------------------------------------------------------------------------------------------------------------------------------------------------|
| Kyrieleis 2007 [95]<br>The Netherlands                  | Long-term outcome after cyclophosphamide treatment in children with steroid-dependent or frequently relapsing minimal change nephrotic syndrome | Retrospective single centre study | NS<br>MCD<br>FRNS<br>SDNS<br>CYC<br>Remission | 93 | <b>Age at NS onset:</b> Median 3 yrs (range 1-14 yrs)<br><b>Age at CYC:</b> Not stated<br>FU: Median time 8 yrs (1-39 yrs)<br>No FU available in 13.<br><b>Indication:</b> Biopsy proven MCD receiving CYC from 1971-2003. FRNS, SDNS | CYC dose: 3mg/kg x 8 wks                                                                                                                                 | <b>No relapse:</b> 33 (35%); median FU 6 yr (2-27 yr) after CYC<br><b>≤ 5 relapses:</b> 19; 3 given CSA<br><b>&gt;6 relapses:</b> 28; 18 given CSA<br><b>Cumulative remission:</b> 35% at 2 yrs; 52% at 6 yrs; 71% at 15 yrs<br>Age < 3 yrs & Males associated with more relapses<br>23 continued with relapses at last FU; most in group with > 6 relapses. 29% with relapses 15 yrs + after CYC. 25% had relapses as adults after CPA. |
| Azib 2011 [96]<br>France                                | Cyclophosphamide in steroid dependent nephrotic syndrome                                                                                        | Retrospective single centre study | NS<br>SDNS<br>CYC<br>Remission<br>AE          | 90 | <b>Age at NS onset:</b> Median 3.2 yrs (IQR 2.4-4.7)<br><b>Age at CYC:</b> Median 5.3 (IQR 3.2-9.1)<br>FU: 5.5 yrs (3.2-8.5 yrs)<br>67M, 23F<br><b>Indication:</b> SDNS. 39 had received LEV, 1 CSA                                   | CYC 2 mg/kg x 10-12 wks after remission (single course). Cumulative dose 160 (149-170) mg/kg<br>Pred: Reduced over 6 mths; some remained on low dose qod | <b>Sustained remission:</b><br>1 yr: 57% (95% CI 47-68)<br>2 yr: 42% (95% CI 32-53)<br>5 yr: 31% (95% CI 21-41)<br><b>Pred</b> ceased in 45 over median 0.9 yrs<br><b>FU:</b> No further IS needed 26 (46%), 23 needed CNI, 25 MMF, 9 RTX.<br>Age at CYC > 7.5 yrs associated with sustained remission<br><b>AE:</b> Leucopenia 4, alopecia 1                                                                                            |

| 1 <sup>st</sup> author, year, [Ref.], country of origin | Title of Publication                                                                                                     | Study design                      | Key words                                           | N   | Population Characteristics                                                                                                                                                                                                                                                                                                                     | Treatment                                                                                                                                                                                                                                                      | Outcomes                                                                                                                                                                                                                                                                                                                                                                                                                                                                                          |
|---------------------------------------------------------|--------------------------------------------------------------------------------------------------------------------------|-----------------------------------|-----------------------------------------------------|-----|------------------------------------------------------------------------------------------------------------------------------------------------------------------------------------------------------------------------------------------------------------------------------------------------------------------------------------------------|----------------------------------------------------------------------------------------------------------------------------------------------------------------------------------------------------------------------------------------------------------------|---------------------------------------------------------------------------------------------------------------------------------------------------------------------------------------------------------------------------------------------------------------------------------------------------------------------------------------------------------------------------------------------------------------------------------------------------------------------------------------------------|
| Zagury 2011 [97]<br>Brazil                              | Long-term follow up cyclophosphamide therapy in steroid-dependent nephrotic syndrome                                     | Retrospective single centre study | NS<br>SDNS<br>CYC<br>Remission                      | 108 | <b>Age at NS onset:</b> Median 2.95 yrs (range 1.1-14.1)<br><b>Age at CYC:</b> 4.92 yrs (range 2-15)<br><b>FU:</b> median 9.5 yrs (5-29); all $\geq$ 5 yrs<br>69M, 39F<br><b>Indication:</b> SDNS. No previous therapy other than prednisone                                                                                                   | CYC: Mean dose 2.41 $\pm$ 0.32 mg/kg/d (in group with sustained remission (>5yrs))<br>2.45 $\pm$ 0.34 mg/kg/d in group without sustained remission)<br>Max dose 168 mg/kg<br>Pred for relapse: 2 mg/kg/d x 4 wks, OOD for 4 wks then 25% reduction every 2 wks | <b>Remission:</b> 2 yr: 34%; 5 yr: 25%; 10 yr: 22%<br><b>Sustained remission &gt; 5 yrs</b> in 27/108.<br><b>Sustained remission:</b> Pred dose at relapse was 0.96 $\pm$ 0.51 mg/kg<br><b>No sustained remission:</b> Pred dose at relapse was 1.29 $\pm$ 0.59 mg/kg<br>Median CYC doses (mg/kg) did not differ<br>Higher sustained remission in children aged $\geq$ 7 yrs at CPA & age at NS onset $\geq$ 2.2 yrs<br><b>AE:</b> No information                                                 |
| Cammis 2011 [98]<br>France<br>Algeria                   | Long-term effects of cyclophosphamide therapy in steroid-dependent or frequently relapsing idiopathic nephrotic syndrome | Retrospective multi-centre study  | NS<br>FRNS<br>SDNS<br>CYC<br>Remission              | 143 | <b>Age at NS onset:</b> median 3.7 yrs (IQR 2.3-5.9)<br><b>CYC</b> started after median 4 relapses (IQR 3-8) & median 1.7 yr (IQR 0.7 – 5.9) after onset<br><b>FU:</b> 88 had other Rx before or after CYC<br><b>Indication:</b> FRNS, SDNS in 75%; steroid toxicity 25%. Those treated with another alkylating agent previously were excluded | CYC: 2-2.5 mg/kg/day for 10-12 wks<br>Pred for relapse<br>Sustained remission defined as 2+ yrs                                                                                                                                                                | <b>Median time to pred withdrawal:</b> 10 mths (IQR 3-34)<br><b>Ongoing remission:</b> 20.5% after median 1.9 yrs<br><b>Relapse free survival (KM analysis)</b><br>1 yr: 45% (CI 35-55)<br>2 yr: 28% (CI 15-41)<br>5 yr: 13% (CI 0-26)<br>10 yr: 11% (CI 0-22)<br>Age < 5 yr: higher risk of relapse<br><b>Median time without relapse:</b> FRNS 15 mths; SDNS 8 mths<br><b>Predictors of sustained remission:</b><br>CYC dose >170 mg/kg; age > 5 yrs; Female; FRNS<br><b>AE:</b> No information |
| Bajeer 2018 [99]<br>Pakistan                            | Histological spectrum and short-term outcome of treatment with cyclophosphamide                                          | Retrospective single centre study | NS<br>SSNS<br>Relapse<br>Kidney biopsy<br>Remission | 74  | <b>Age at NS onset:</b> Median 5 yr (IQR 4-7)<br><b>Start of CYC:</b> median 17 mths (13-27) after NS onset                                                                                                                                                                                                                                    | CYC 2-2.5 mg/kg/d (max 180 mg/kg)<br>Relapsing NS defined as >2 relapses/yr.                                                                                                                                                                                   | <b>Remission at 1 yr:</b> 41 (55%) (rest CNI dependent).<br><b>Remission at 2 yrs:</b> 27 (37%)<br><b>Duration of Remission:</b> MCD (54): 12 mths (5.5-22)                                                                                                                                                                                                                                                                                                                                       |

| 1 <sup>st</sup> author, year, [Ref.], country of origin              | Title of Publication                                                                                                          | Study design               | Key words                                                                                         | N                          | Population Characteristics                                                                                                                                                                                                                 | Treatment                                                                                                                                                                                        | Outcomes                                                                                                                                                                                                                                                                                                                                                                                                                                                        |
|----------------------------------------------------------------------|-------------------------------------------------------------------------------------------------------------------------------|----------------------------|---------------------------------------------------------------------------------------------------|----------------------------|--------------------------------------------------------------------------------------------------------------------------------------------------------------------------------------------------------------------------------------------|--------------------------------------------------------------------------------------------------------------------------------------------------------------------------------------------------|-----------------------------------------------------------------------------------------------------------------------------------------------------------------------------------------------------------------------------------------------------------------------------------------------------------------------------------------------------------------------------------------------------------------------------------------------------------------|
|                                                                      | in relapsing steroid-sensitive nephrotic syndrome                                                                             |                            |                                                                                                   |                            | <b>FU:</b> 2 yrs after CYC 47M; 27F<br><b>Indication:</b> Patients 2012-2014 with relapsing SSNS with biopsy. Excluded adolescent, infantile NS, previous use of non-steroid IS, loss to FU                                                | Pred 1 mg/kg qod                                                                                                                                                                                 | FSGS (13): 20.4 ± 8.4 mths<br>MesPGN (6): 15.6 ± 9.8 mths<br><b>AE:</b> leucopenia 6 (all able to complete CYC);<br>anaemia 1; alopecia 1.                                                                                                                                                                                                                                                                                                                      |
| <b>Studies with CPA – comparing different steroid-sparing agents</b> |                                                                                                                               |                            |                                                                                                   |                            |                                                                                                                                                                                                                                            |                                                                                                                                                                                                  |                                                                                                                                                                                                                                                                                                                                                                                                                                                                 |
| <b>CPA vs. Csa</b>                                                   |                                                                                                                               |                            |                                                                                                   |                            |                                                                                                                                                                                                                                            |                                                                                                                                                                                                  |                                                                                                                                                                                                                                                                                                                                                                                                                                                                 |
| Sümeği 2008 [88]<br>Hungary                                          | Long-term follow-up after cyclophosphamide and cyclosporine-A therapy in steroid-dependent and – resistant nephrotic syndrome | Retrospective study        | Cyclosporine A, cyclophosphamide, immunosuppressive therapy, steroid resistant, steroid dependent | 37, of those SDN S 23      | <b>CPA:</b> n=22, of those SDNS n=15<br><b>Csa:</b> n=15, of those SDNS n=8<br><b>Age at NS onset:</b><br>CPA: 7.7 ± 3.8 yrs<br>steroid<br>Csa: 9.5 ± 4.7 yrs<br><b>FU:</b> 7.1 (6-13) yrs<br>25 M; 12 F<br><b>Indications:</b> SDNS, SRNS | <b>CPA:</b> 2-2.5 mg/kg/d<br>Duration: 2.5 ± 0.5 mths<br><b>Csa:</b> 3-5 mg/kg/day, trough levels 100-200 ng/ml<br><b>Duration:</b> 28 ± 15 mths<br><b>Other:</b> oral steroids in tapering dose | <b>Remission at 5 yrs:</b><br>CPA: 20/22 (90.9%)<br>Csa: 10/15 (66.6%)<br><b>RR:</b> decreased in both groups:<br>CPA: from 3.4±2.8/yr to 0.1±0.2/yr<br>Csa: from 3.7±3.1 to 0.6±0.8/yr<br><b>Time to relapse:</b><br>CPA: 29.9 ± 21.5 mths vs. Csa: 28.1 ± 22.4 mths<br><b>AE:</b><br>CPA: nausea 3/22, reversible hair loss 2/22, leucopenia 1/22, alopecia 1/22<br>Csa: hirsutism 3/15, temor 2/15, gingival hyperplasia 2/15, nausea and appetite loss 1/15 |
| <b>CPA vs. LEV</b>                                                   |                                                                                                                               |                            |                                                                                                   |                            |                                                                                                                                                                                                                                            |                                                                                                                                                                                                  |                                                                                                                                                                                                                                                                                                                                                                                                                                                                 |
| Aisaran K 2001 [100]<br>Only abstract available                      | Levamisole vs. cyclophosphamide for frequently relapsing steroid-dependent syndrome                                           | Retrospective analysis     | SDNS<br>Levamisol<br>cyclophosphamide<br>Children relapse                                         | Total<br>51,<br>LEV:<br>24 | <b>LEV</b> n=24<br><b>CPA</b> n=27<br><b>Age at NS onset:</b><br><b>Age at LEV:</b><br><b>FU:</b><br><b>Indications:</b>                                                                                                                   | <b>LEV:</b><br><b>CPA:</b><br><b>Duration:</b><br><b>Other:</b>                                                                                                                                  | <b>RR:</b> Reduced by 0.28 relapses/patient/year ( <b>LEV</b> ) and 0.32 relapses/patient-year ( <b>CPA</b> )<br><b>Cumulative dose of pred.:</b> reduced by 336mg/m <sup>2</sup> /mth ( <b>LEV</b> ) and 387 mg/m <sup>2</sup> /month ( <b>CPA</b> ).<br><b>AE:</b>                                                                                                                                                                                            |
| <b>CPA – LEV - Csa</b>                                               |                                                                                                                               |                            |                                                                                                   |                            |                                                                                                                                                                                                                                            |                                                                                                                                                                                                  |                                                                                                                                                                                                                                                                                                                                                                                                                                                                 |
| Abeyagunawardena 2003 [89]<br>UK                                     | The use of steroid-sparing agents in nephrotic syndrome                                                                       | Retrospective cohort study | Nephrotic syndrome<br>Steroid sensitive                                                           |                            | <b>CPA:</b> n=178 (1 <sup>st</sup> agent)<br><b>LEV:</b> n=113, of those 1 <sup>st</sup> agent n=65<br><b>Csa:</b> n=61 as 2 <sup>nd</sup> agent in                                                                                        | <b>CPA:</b> 3 mg/kg daily<br><b>Duration:</b> 8 wks<br><b>LEV:</b> 2.5 mg/kg on                                                                                                                  | <b>CPA:</b> sustained remission at 1 yr: 94/178 (54%), at 2 yrs: 44%, at 5 yrs: 32%, 2 <sup>nd</sup> course of CPA: 18/178 (10%)                                                                                                                                                                                                                                                                                                                                |

| 1 <sup>st</sup> author, year, [Ref.], country of origin | Title of Publication                                                                     | Study design                      | Key words                                                     | N                          | Population Characteristics                                                                                                                                                                                                                                                                                    | Treatment                                                                                                                                                                                                                                                           | Outcomes                                                                                                                                                                                                                                                                                                                                                                                                                                                                                                                                                                              |
|---------------------------------------------------------|------------------------------------------------------------------------------------------|-----------------------------------|---------------------------------------------------------------|----------------------------|---------------------------------------------------------------------------------------------------------------------------------------------------------------------------------------------------------------------------------------------------------------------------------------------------------------|---------------------------------------------------------------------------------------------------------------------------------------------------------------------------------------------------------------------------------------------------------------------|---------------------------------------------------------------------------------------------------------------------------------------------------------------------------------------------------------------------------------------------------------------------------------------------------------------------------------------------------------------------------------------------------------------------------------------------------------------------------------------------------------------------------------------------------------------------------------------|
| Chen SY<br>2010 [90]<br>Taiwan                          | Treatment course of steroid-dependent nephrotic syndrome: emphasized on treatment effect | Retrospective single center study | Chlorambucil<br>Cyclophosphamide<br>Cyclosporine<br>Levamisol | Total<br>46,<br>LEV:1<br>5 | SDNS following CPA treatment: 1 <sup>st</sup> agent n=8<br><b>Chlorambucil:</b> n=15 when other therapies failed<br><b>Age at NS onset:</b> not stated<br><b>FU:</b> 6.1 yrs (IQR 1-17.4) yrs<br><b>Indications:</b> SDNS, FRNS                                                                               | alternate days<br><b>Duration:</b> 3.2 (1-7) yrs<br><b>CSA:</b> 3-5 mg/kg in 2 divided doses (12htrough level 50-150 µg/l)<br><b>Other:</b> all: oral steroids in tapering dose                                                                                     | <b>LEV:</b> sustained remission at 1 yr 19/65 (30%) as 1 <sup>st</sup> agent, relapse after stop of LEV 4. 32/48 (66%) with sustained remission when used after unsuccessful CPA<br><b>CSA:</b> 43/61 (70%) with sustained remission; relapse following discontinuation 32 (51%).<br><b>CHL:</b> sustained remission at 1 yr: 7.<br><b>AE:</b><br><b>CPA:</b> neutropenia 16/178, requiring interruption of med., serious infection 4/178<br><b>LEV:</b> reversible neutropenia 4, skin rash 2 (requiring end of treatment)<br><b>CSA:</b> nephrotoxicity 4<br><b>CHL:</b> not stated |
| <b>CPA – CSA – MMF – LEV - AZA</b>                      |                                                                                          |                                   |                                                               |                            |                                                                                                                                                                                                                                                                                                               |                                                                                                                                                                                                                                                                     |                                                                                                                                                                                                                                                                                                                                                                                                                                                                                                                                                                                       |
| Moustafa BH 2016 [101]                                  | Immunosuppressive therapy in children                                                    | Retrospective chart review        | Childhood Nephrotic                                           | 79                         | <b>CPA:</b> n=28<br><b>CSA:</b> n=6                                                                                                                                                                                                                                                                           | <b>CPA:</b> 2-3 mg/kg/d orally for 8-12 wks                                                                                                                                                                                                                         | <b>Remission for 6 mths:</b><br><b>CPA:</b> 24/28 (85.7%)                                                                                                                                                                                                                                                                                                                                                                                                                                                                                                                             |
|                                                         |                                                                                          |                                   |                                                               |                            | <b>LEV:</b> n=15<br><b>CHL:</b> n=22<br><b>CSA:</b> n=8<br><b>2<sup>nd</sup> CPA:</b> n=6<br><b>Age at NS onset:</b> 4.5 (1-15.5) yrs<br><b>Age at medication:</b> not stated<br><b>FU:</b> 96 (22-244) mths<br>33M, 13 F<br><b>Indications:</b> SDNS despite one course of CPA as 1 <sup>st</sup> line agent | <b>LEV:</b> 2-3.3 mg/kg/day for 3-20 mths<br><b>CHL:</b> 0.1-0.2 mg/kg/d for 8 weeks<br><b>CSA:</b> 3.5-5 mg/kg/d for 6-14 mths, then tapering for 12-23 mths<br><b>2<sup>nd</sup> CPA:</b> 2-3 mg/kg/day for 8 wks<br><b>Other:</b> oral steroids in tapering dose | <b>Relapses after 1<sup>st</sup> CPA course:</b> 25/46<br><b>Relapses after additional treatment:</b><br>LEV: 1/15 remission, 1 with SSNS relapses, 1 relapse-free period, 1 LEV dependency, 10 no response<br>CHL: 7/22 complete remission, 5 with relapses, 4 disease-free for 6.8 (2-11) mths, 3 no response<br>CSA: 1/8 rem., 1 with SSNS relapses, 1 disease-free period, 4 CSA dependency<br><b>2<sup>nd</sup> CPA:</b> 3/6 disease-free period, 1 decreased steroid threshold, 2 no response<br><b>AE:</b> not stated                                                          |

| 1 <sup>st</sup> author, year, [Ref.], country of origin | Title of Publication                                                                                                          | Study design               | Key words                                                                                                                                   | N   | Population Characteristics                                                                                                                                                                                                                                                                                                       | Treatment                                                                                                                                                                                                                                                                                                                                                                                                                                                | Outcomes                                                                                                                                                                                                                                                                                                                                                                                                                                                                                                                                                      |
|---------------------------------------------------------|-------------------------------------------------------------------------------------------------------------------------------|----------------------------|---------------------------------------------------------------------------------------------------------------------------------------------|-----|----------------------------------------------------------------------------------------------------------------------------------------------------------------------------------------------------------------------------------------------------------------------------------------------------------------------------------|----------------------------------------------------------------------------------------------------------------------------------------------------------------------------------------------------------------------------------------------------------------------------------------------------------------------------------------------------------------------------------------------------------------------------------------------------------|---------------------------------------------------------------------------------------------------------------------------------------------------------------------------------------------------------------------------------------------------------------------------------------------------------------------------------------------------------------------------------------------------------------------------------------------------------------------------------------------------------------------------------------------------------------|
| Egypt                                                   | with steroid-resistant, frequently-relapsing, and steroid-dependent idiopathic nephrotic syndrome: a single center experience | Single center              | Syndromes<br>Steroid Resistance<br>Steroid Dependence<br>Relapse<br>immunosuppressants                                                      |     | <b>MMF:</b> n=2<br><b>LEV:</b> n=40<br><b>AZA:</b> n=10<br><br><b>Age at NS onset:</b> 3.7 (1.3-10.5) yrs<br><b>Age at medication:</b> not stated<br><b>FU:</b> 44 M, 35 F<br><b>Indications:</b> SDNS/FRNS, steroid toxicity                                                                                                    | or IV as monthly bolus of 500-750 mg/m <sup>2</sup> for 6 mths<br><b>CSA:</b> 4-6 mg/kg/d divided into 2 doses for at least 12 mths<br><b>MMF:</b> 1200 mg/m <sup>2</sup> /day divided into doses<br><b>LEV:</b> 2-2.5 mg/kg/dose twice weekly for 6-24 mths<br><b>AZA:</b> 2 mg/kg/d for 8 wks.<br><br>Either given as 1 <sup>st</sup> or 2 <sup>nd</sup> line drug; some given in double- or triple-combination therapy<br><b>Other:</b> oral steroids | <b>CSA:</b> 5/6 (83.3%)<br><b>MMF:</b> 1/2 (50%)<br><b>LEV:</b> 22/40 (55%)<br><b>AZA:</b> 8/10 (80%)<br><br><b>AE</b> (not differentiated between SDNS (n=79) and SRNS (n=51)):<br>CPA: Leukopenia 15/63 (23.8%), hemorrhagic cystitis 2/63 (3.2%)<br>CSA: gym hyperplasia 8/31 (25.8%), hirsutism 7/31 (22.6%), nephrotoxicity 2/31 (6.4%), hypertension 2/31 (6.4%)<br>MMF: diarrhea 7/12 (58.4%), nausea 3/12 (25%), abdominal pain 1 (8.3%), cough 1/12 (8.3%)<br>LEV: none<br>AZA: Leukopenia 2/10, diarrhea 2/10, abdominal pain 2/10, arthralgia 1/10 |
| <b>CsA/Tac – CPA – LEV - MMF</b>                        |                                                                                                                               |                            |                                                                                                                                             |     |                                                                                                                                                                                                                                                                                                                                  |                                                                                                                                                                                                                                                                                                                                                                                                                                                          |                                                                                                                                                                                                                                                                                                                                                                                                                                                                                                                                                               |
| Moorani 2019 [92]<br>Pakistan                           | immunosuppressive therapy in children with primary nephrotic syndrome: single center experience, Karachi, Pakistan            | Retrospective chart review | Nephrotic syndrome<br>Minimal change disease<br>Oral prednisolone<br>Levamisole<br>Cyclophosphamide<br>Cyclosporin<br>Mycophenolate mofetil | 130 | <b>CPA:</b> n=90<br><b>CSA:</b> n=88<br><b>LEV:</b> n=55<br><b>MMF:</b> n=39<br><b>CSA+MMF:</b> n=20<br><b>TAC+/-MMF:</b> n=11<br><br><b>Age at NS onset:</b> 4.78 ± 3.23 yrs<br><b>Age at medication:</b> not stated<br><b>FU:</b> not stated, at least 6 mths<br><b>Indication:</b> SDNS (n=55), FRNS (n=75), steroid toxicity | <b>Sequential use:</b><br><b>CPA:</b> 2-3 mg/kg/d for 8-12 wks (2 <sup>nd</sup> line)<br><b>CNI:</b> (3 <sup>rd</sup> line), dose not stated<br><b>LEV:</b> 2-2.5 mg/kg on a.d. for 6-24 mths (1 <sup>st</sup> line)<br><b>MMF:</b> (3 <sup>rd</sup> line); dose not stated<br><br><b>Other:</b> oral steroids                                                                                                                                           | <b>Remission (complete; partial) at 6 mths:</b><br>CPA: 45/90; 13/90<br>CSA: 30/88; 18/88<br>LEV: effective 44/55<br>MMF: 4/39; 16/39<br>CSA+MMF: 4/20; 7/20, CSA dependent 9/20<br><b>Outcome last FU:</b><br>Compl. Rem. Off treatment: 65/130<br>Compl. Rem. ON treatment: 34/130<br>Partial rem. ON treatment: 12/130<br><b>AE:</b>                                                                                                                                                                                                                       |



| 1 <sup>st</sup> author, year, [Ref.], country of origin | Title of Publication | Study design | Key words | N | Population Characteristics | Treatment | Outcomes                                                                                                                                                                                                |
|---------------------------------------------------------|----------------------|--------------|-----------|---|----------------------------|-----------|---------------------------------------------------------------------------------------------------------------------------------------------------------------------------------------------------------|
|                                                         |                      |              |           |   |                            |           | CPA: severe infection (disseminated chicken pox 9, BMS 5, alopecia 3)<br>CSA: gum hyperplasia 5, hypertrichosis 6, renal dysfunction 7, deafness 1<br>LEV: pancytopenia 1, allergic rash 1<br>MMF: none |

**Table S8.3: Mycophenolate Mofetil (MMF)/Mycophenolate Sodium (MPS)**

| 1 <sup>st</sup> author, year, [Ref.], country of origin       | Title of Publication                                                                                 | Study design                                | Key words                                                                                | N  | Population Characteristics                                                                                                                                                                                                                                                                                             | Treatment                                                                                                                                                         | Outcomes                                                                                                                                                                                                                                                                                                                                                                  |
|---------------------------------------------------------------|------------------------------------------------------------------------------------------------------|---------------------------------------------|------------------------------------------------------------------------------------------|----|------------------------------------------------------------------------------------------------------------------------------------------------------------------------------------------------------------------------------------------------------------------------------------------------------------------------|-------------------------------------------------------------------------------------------------------------------------------------------------------------------|---------------------------------------------------------------------------------------------------------------------------------------------------------------------------------------------------------------------------------------------------------------------------------------------------------------------------------------------------------------------------|
| <b>Mycophenolate Mofetil (MMF)/Mycophenolate Sodium (MPS)</b> |                                                                                                      |                                             |                                                                                          |    |                                                                                                                                                                                                                                                                                                                        |                                                                                                                                                                   |                                                                                                                                                                                                                                                                                                                                                                           |
| Bagga 2003 [102]<br>India                                     | Mycophenolate Mofetil and prednisolone therapy in children with steroid-dependent nephrotic syndrome | Prospective analysis single center          | MMF<br>Prednisolone<br>Minimal change disease<br>Focal segmental glomerulosclerosis      | 19 | <b>Age at NS onset:</b> 35.6 (13-92) mths<br><b>Age at MMF:</b> 99.1 (32-134) mths<br><b>Duration of NS before MMF:</b> 53.5 (10-94) mths<br><b>FU:</b> 17 (14-20) mths<br>13M, 6F<br><b>Indication:</b> SDNS despite prior LEV (n=16), CPA (n=15), steroid toxicity (cushingoid features: all, growth retardation: 7) | <b>MMF:</b> 29 mg/kg/d (20.8-33.3) in 2 divided doses<br><b>Duration:</b> 11.8 (9-12.8 mths)<br><b>Other:</b> oral steroids in tapering dose                      | <b>RR:</b> decreased from 6.6 (95% CI, 5.4-7.7) to 2 (95% CI, 1.2-2.7)/yr (p<0.0001)<br>> 50% reduction in RR in 14/19<br>Increase of RR to 4.2/yr (95% CI, 2.8-5.5) after MMF discontinuation<br><b>Steroid dose:</b> reduction from 0.7 (95% CI, 0.6-0.8) to 0.3 (95% CI, 0.2-0.4) mg/kg/d (p<0.0001)<br><b>MMF treatment failure:</b> 3/19<br><b>AE:</b> None relevant |
| Novak 2005 [103]<br>USA                                       | Efficacy of mycophenolate mofetil in pediatric patients with steroid-dependent nephrotic syndrome    | Retrospective chart review<br>Single centre | NS<br>SDNS<br>Relapse<br>MMF<br>AE                                                       | 21 | <b>Age at NS onset:</b> 3.9 ± 3.1yrs.<br><b>Age at MMF:</b> 8.2 ± 4.4yrs<br><b>FU</b> 1.9 yr ± 1.0 yrs<br>18M, 3F<br><b>Indication:</b> SDNS 17; steroid toxicity 4                                                                                                                                                    | <b>MMF</b> 600 mg/m <sup>2</sup> bd, max 1000 mg bd<br><b>Duration:</b> 1.0 ± 0.5 yrs (0.2-2 yrs)<br><b>Other:</b> steroids 20 for relapse, CSA 1                 | <b>RR:</b> 0.80 ± 0.41 fell to 0.47± 0.43/mth<br><b>Time to relapse:</b> 3.8±4.2 mths<br>> 50% reduction in RR in 12 pts<br><b>AE:</b> Infection 1, GIT transient upset 2                                                                                                                                                                                                 |
| Mendizabal 2005 [104]<br>Spain                                | Mycophenolate mofetil in steroid/cyclosporine-dependent/resistant nephrotic syndrome                 | Prospective cohort study                    | Mycophenolate mofetil<br>nephrotic syndrome<br>FSGS<br>MCCGN<br>Children<br>Cyclosporine | 21 | <b>Age at NS onset:</b> 2.8 (1.2-12.5) yrs<br><b>Age at MMF:</b> 11.4 (5-17) yrs<br><b>FU:</b><br><b>Indication:</b> SDNS, despite CPA, CSA                                                                                                                                                                            | <b>MMF</b> 600 mg/m <sup>2</sup> bd, adjusted to maintain trough MPA levels at 2.5-5 µg/ml.<br><b>Duration:</b> 6 mths<br><b>Other:</b> Tapering dose of steroids | <b>Steroid sparing effect</b> on MMF: 15/21, of those 10 with complete withdrawal of steroids<br><b>Probability of remaining in remission at 3 and 6 mths:</b> 76% and 51%<br><b>Sustained remission</b> on MMF: 9<br><b>Relapses on MMF:</b> 12 (23 relapses)<br><b>Immediate relapse after MMF:</b> 7/15                                                                |

| 1 <sup>st</sup> author, year, [Ref.], country of origin | Title of Publication                                                                                                                                        | Study design                                                                          | Key words                                        | N  | Population Characteristics                                                                                                                                                                                                                                    | Treatment                                                                                                                                                                                                                                | Outcomes                                                                                                                                                                                                                                                       |
|---------------------------------------------------------|-------------------------------------------------------------------------------------------------------------------------------------------------------------|---------------------------------------------------------------------------------------|--------------------------------------------------|----|---------------------------------------------------------------------------------------------------------------------------------------------------------------------------------------------------------------------------------------------------------------|------------------------------------------------------------------------------------------------------------------------------------------------------------------------------------------------------------------------------------------|----------------------------------------------------------------------------------------------------------------------------------------------------------------------------------------------------------------------------------------------------------------|
| Hogg 2006 [105]<br>USA                                  | Mycophenolate mofetil in children with frequently relapsing nephrotic syndrome: A Report from the Southwest Pediatric Nephrology Study Group                | Multicentre prospective single arm study<br>13 centres                                | NS<br>FRNS<br>SDNS<br>Relapse<br>MMF<br>AE       | 32 | <b>Age at NS onset:</b> Not stated<br><b>Age at MMF:</b> 6.8 ± 2.7yrs<br><b>FU:</b> Up to 30 mths<br>18M, 14F<br>No previous Rx with LEV, CSA, TAC<br><b>Indication:</b> FRNS 26; SDNS 6                                                                      | <b>MMF</b> 600 mg/m <sup>2</sup> bd, max 1000 mg bd<br><b>Duration:</b> 28 wks<br><b>Other:</b> Tapering dose of steroids                                                                                                                | <b>Relapse</b> on MMF: 8<br><b>Relapse</b> within 6 mths of stopping MMF: 12<br><b>Relapse</b> > 6+ mths after ceasing MMF: 12<br><b>AE:</b> leucopenia 5 (1 ceased MMF), GIT upset 1,                                                                         |
| Atzal 2007 [106]<br>India                               | Treatment with mycophenolate mofetil and prednisolone for steroid-dependent nephrotic syndrome                                                              | Retrospective chart review of patients who received MMF for ≥ 6 mths<br>Single centre | NS<br>SDNS<br>Relapse<br>MMF<br>AE               | 42 | <b>Age at NS onset:</b> 3.1 yrs (range 1.1-7.7 yrs)<br><b>Age at MMF:</b> 8.8 yrs (range 2.7 -15.6 yrs)<br><b>FU:</b> Up to 45 mths<br>27M, 15F<br><b>Indication:</b> SDNS despite LEV (6 mths) &/or CPA (12 wks)                                             | <b>MMF</b> 27 mg/kg/d (range 17-31 mg/kg/d)<br><b>Duration:</b> 1.2 yrs (range 0.5-3.8 yrs)<br><b>Other:</b> Tapering dose of steroids                                                                                                   | <b>RR:</b> 6.0 (95% CI 5.2-6.7) fell to 2.2 (95% CI 1.4-2.9) per pt/yr<br><b>Pred dose:</b> 0.6 mg/kg/d (95% CI 0.5-0.7) fell to 0.3 mg/kg/d (95% CI 0.3-0.4)<br><b>AE:</b> Transient GIT upset 9. Infections 4                                                |
| Fujinaga 2009 [107]<br>Japan                            | Mycophenolate mofetil therapy for childhood-onset steroid dependent nephrotic syndrome after long term cyclosporine: extended experience in a single centre |                                                                                       | NS<br>SDNS<br>Relapse<br>MMF<br>MPA levels<br>AE | 26 | <b>Age at NS onset:</b> 5.1 ± 3.3 yrs<br>Age at MMF: 13.1 ± 4.1 yrs<br><b>FU:</b> Mean FU 19mths (7-42 mths)<br>19M, 7F<br><b>Indication:</b> SDNS (19 MCD, 7 FSGS) & received MMF for ≥6mths. Pts had received CSA for mean 56 mths. Used ISKDC definitions. | <b>MMF</b> 250 mg/12 hr increased to 1 gm/12 hr adjusted for pre-dose MPA level of 2-5 µg/ml. Mean dose 34 ± 6 mg/kg<br><b>Duration:</b> Mean FU 19mths (7-42 mths)<br><b>Other:</b> CSA tapered, MZR discontinued, steroids for relapse | <b>RR:</b> 2.5 ± 1.4 fell to 0.8 ± 1.2/pt/yr<br><b>Pred &amp; CSA:</b> Tapered in 20; 15 off CSA; 11 off pred. CSA reintroduced/increased in 6.<br><b>MPA levels:</b> < 3 µg/ml more likely to relapse<br><b>AE:</b> Anaemia 1, herpes labialis 1. GIT upset 0 |
| Baudouin 2012 [108]<br>France                           | Mycophenolate mofetil for steroid dependent nephrotic syndrome: a phase                                                                                     | Open single-arm phase II prospective study                                            | NS<br>SDNS<br>Relapse<br>Height                  | 23 | <b>Age at NS onset:</b> median 2.1 yrs (range 2.0-3.5)<br><b>Age at MMF:</b> median 6.0 yrs (range 6.9-11.0)                                                                                                                                                  | <b>MMF</b> 600mg/m <sup>2</sup> /d for 7 days & then 1200mg/m <sup>2</sup> /d in 2 doses.                                                                                                                                                | <b>Relapse</b> in 6 mths: 4<br><b>Relapse</b> in 12 mths: 2<br><b>No Relapse</b> in 12 mths:17<br><b>Median pred dose:</b> Fell                                                                                                                                |

| 1 <sup>st</sup> author, year, [Ref.], country of origin | Title of Publication                                                                      | Study design                                    | Key words                          | N  | Population Characteristics                                                                                                                                                                                                                                        | Treatment                                                                                                                                                                                                                       | Outcomes                                                                                                                                                                                                                                                                                                                                                                                                                                                                                        |
|---------------------------------------------------------|-------------------------------------------------------------------------------------------|-------------------------------------------------|------------------------------------|----|-------------------------------------------------------------------------------------------------------------------------------------------------------------------------------------------------------------------------------------------------------------------|---------------------------------------------------------------------------------------------------------------------------------------------------------------------------------------------------------------------------------|-------------------------------------------------------------------------------------------------------------------------------------------------------------------------------------------------------------------------------------------------------------------------------------------------------------------------------------------------------------------------------------------------------------------------------------------------------------------------------------------------|
| Banerjee 2013 [109]<br>India                            | Outcome of severe steroid-dependent nephrotic syndrome treated with mycophenolate mofetil | Multicentre observational study<br>Four centres | NS<br>SDNS<br>Relapse<br>MMF<br>AE | 46 | Age at NS onset: 2.2 ± 0.97 yrs<br>Age at MMF: 6.57 ± 3.0 yrs<br>FU: 3.56 ± 1.76 yrs<br>30M, 16F<br><b>Indication:</b> SDNS requiring > 0.5 mg/kg Pred alt day despite LEV (6 mths), CPA (8-12 wks)                                                               | <b>MMF</b> 20-30 mg/kg/d in 2 doses after remission<br><b>Duration:</b> 12 mths<br><b>Other:</b> Steroids tapered over 6 mths                                                                                                   | from 25mg/m <sup>2</sup> /d to 9mg/m <sup>2</sup> /d at 6 mths in 19 without relapse<br><b>Weight</b> fell by 1 SDS; no change in height SDS<br><b>AE:</b> transient GIT upsets 6, mild infections 18, reduced dose for anaemia 1                                                                                                                                                                                                                                                               |
| Dehoux 2016 [110]<br>France                             | Mycophenolate mofetil in steroid-dependent idiopathic nephrotic syndrome                  | Retrospective single centre study               | NS<br>SDNS<br>Relapse<br>MMF<br>AE | 96 | <b>Age at NS onset:</b> median 3.1 yrs (IQR 2.3-4.1)<br><b>Age at MMF:</b> median 7.3 yrs (IQR 4.2-10.4)<br><b>FU:</b> Median 4.7 yrs (IQR 3.0-6.0)<br>71M, 25F<br><b>Indication:</b> SDNS in pts not on other immunosuppressives; no previous treatment with RTX | <b>MMF:</b> 600 mg/m <sup>2</sup> for 7 days, then 1200 mg/m <sup>2</sup> /dose in 2 doses.<br><b>Duration:</b> Median 32 mths (IQR 22-46 mths)<br><b>Other:</b> Pred ceased in 49/96 after median 18.1 mth (IQR 7.8-30.0 mths) | <b>Remission:</b> Median relapse free survival 15 mths (IQR 5.6 – 37.1 mths)<br><b>Relapse</b> when pred ceased 22<br>Responders (≥50% fall in RR &/or ≥60% fall in cumulative pred dose in 1 yr): 74<br>Non-responders: 22. Non-responder older, slower to remission in 1 <sup>st</sup> episode, more relapses pre MMF<br><b>Last FU:</b> 58/96 in remission without treatment<br><b>AE:</b> Transient GIT upset 6; severe GIT upset 5 (1 ceased MMF). Leucopenia 2. Depression 1 (MMF ceased) |
| Kapoor 2017 [111]<br>India                              | Mycophenolate sodium in children                                                          | Retrospective single centre                     | NS<br>FRNS                         | 40 | <b>Age at NS onset:</b> Not stated                                                                                                                                                                                                                                | <b>EC-MPS:</b> Mean dose at start 796 ±                                                                                                                                                                                         | <b>Remission:</b> 30 had CR; 2 PR. 2 no response at 6                                                                                                                                                                                                                                                                                                                                                                                                                                           |

| 1 <sup>st</sup> author, year, [Ref.], country of origin              | Title of Publication                                                                                                                          | Study design                      | Key words                                  | N  | Population Characteristics                                                                                                                                                                                                                                                         | Treatment                                                                                                                                                                                                                                             | Outcomes                                                                                                                                                                                                                                                                                                                                                           |
|----------------------------------------------------------------------|-----------------------------------------------------------------------------------------------------------------------------------------------|-----------------------------------|--------------------------------------------|----|------------------------------------------------------------------------------------------------------------------------------------------------------------------------------------------------------------------------------------------------------------------------------------|-------------------------------------------------------------------------------------------------------------------------------------------------------------------------------------------------------------------------------------------------------|--------------------------------------------------------------------------------------------------------------------------------------------------------------------------------------------------------------------------------------------------------------------------------------------------------------------------------------------------------------------|
| Nandi 2019 [112]<br>India                                            | Efficacy of mycophenolate mofetil as a remission maintaining agent in idiopathic childhood nephrotic syndrome                                 | Prospective single centre study   | NS<br>FRNS<br>SDNS<br>Relapse<br>MMF       | 32 | <b>Age at NS onset:</b> 2.72 ± 1.3 yrs<br><b>Age at MMF:</b> 7.17 ± 2.2 yrs<br><b>FU:</b> Unclear<br>22M, 10F<br><b>Indication:</b> FRNS 6, SDNS 26 requiring continuous medication for ≥12 mths (pred, LEV, CPA)                                                                  | <b>MMF:</b> 1000-1200 mg/m <sup>2</sup> /d; max dose 1000 mg in 2 doses<br><b>Duration:</b> 28 wks<br><b>Other:</b> Pred dose reduced                                                                                                                 | <b>RR:</b> 3.43 ± 1.26 fell to 1.62 ± 1.14/p/yr<br><b>Pred dose:</b> 190.9 ± 47.81 fell to 119.09 ± 60.09 mg/kg/yr<br><b>AE:</b> Transient GIT upset 2                                                                                                                                                                                                             |
| Karunamoorthy 2020 [113]<br>India                                    | The safety and efficacy of mycophenolate mofetil in children and adolescents with steroid-dependent nephrotic syndrome: a single centre study | Retrospective single centre study | NS<br>FRNS<br>SDNS<br>Relapse<br>MMF<br>AE | 87 | <b>Age at onset of NS:</b> median 3 yrs (95% CI 1-8)<br><b>Age at MMF:</b> median 7 yrs (95% CI 2-12)<br><b>FU:</b> median 3 yr 6 mth (95% CI 1 yr 3 mth to 6 yrs 6 mths)<br>58M, 29F<br><b>Indication:</b> FRNS 56, SDNS 31 who relapsed or did not achieve remission with IV CPA | <b>MMF:</b> 30 mg/kg in 2 doses. Pts included if treated with MMF ≥ 12 mths. MMF dose tapered after 2 yrs if sustained remission.<br><b>Duration:</b> median 2 yrs 6 mths (95% CI 1 yr 3 mths to 6 yrs 6 mths)<br><b>Other:</b> Pred duration unclear | <b>Remission:</b> 72 were MMF sensitive. Pred dose fell from 1.28 mg/kg to 0.35 mg/kg. 63 had 1 relapse, 16 had 2 relapses, 15 had 3+ relapses.<br>Of 31 pts on MMF for 2yrs without relapse, all relapsed when MMF ceased<br><b>Treatment failure:</b> 15 continued frequent relapses on MMF<br><b>AE:</b> Infection 13, low white count 3, transient GIT upset 2 |
| <b>Studies with MMF – comparing different steroid-sparing agents</b> |                                                                                                                                               |                                   |                                            |    |                                                                                                                                                                                                                                                                                    |                                                                                                                                                                                                                                                       |                                                                                                                                                                                                                                                                                                                                                                    |
| <b>MMF vs. TAC</b>                                                   |                                                                                                                                               |                                   |                                            |    |                                                                                                                                                                                                                                                                                    |                                                                                                                                                                                                                                                       |                                                                                                                                                                                                                                                                                                                                                                    |
| Wang 2016 [85]<br>China                                              | Evaluation of mycophenolate mofetil or                                                                                                        | Prospective single center study   | Children<br>Mycophenolate<br>mofetil       | 72 | <b>MMF Group:</b> n=34, completed protocol n=30<br><b>TAC Group:</b> n=38,                                                                                                                                                                                                         | <b>MMF:</b> 20-30 mg/kg/d in 2 divided doses                                                                                                                                                                                                          | <b>Remission at 12 mths:</b> MMF 24 (90%); TAC 31 (97%)                                                                                                                                                                                                                                                                                                            |

| 1 <sup>st</sup> author, year, [Ref.], country of origin | Title of Publication                                                                                                                                | Study design                       | Key words                                                                                  | N  | Population Characteristics                                                                                                                                                                                                                          | Treatment                                                                                                                                                                                           | Outcomes                                                                                                                                                                                                                                                                                                                                                                                                                                                                                                                                                                                                                                                                                                                                                 |
|---------------------------------------------------------|-----------------------------------------------------------------------------------------------------------------------------------------------------|------------------------------------|--------------------------------------------------------------------------------------------|----|-----------------------------------------------------------------------------------------------------------------------------------------------------------------------------------------------------------------------------------------------------|-----------------------------------------------------------------------------------------------------------------------------------------------------------------------------------------------------|----------------------------------------------------------------------------------------------------------------------------------------------------------------------------------------------------------------------------------------------------------------------------------------------------------------------------------------------------------------------------------------------------------------------------------------------------------------------------------------------------------------------------------------------------------------------------------------------------------------------------------------------------------------------------------------------------------------------------------------------------------|
|                                                         | Tacrolimus in children with steroid sensitive but frequently relapsing or steroid-dependent nephrotic syndrome                                      |                                    | Primary nephrotic syndrome<br>tacrolimus                                                   |    | complete study protocol<br>n=35<br><b>Age at NS onset:</b> 43.1 ± 25.6 mths (MMF), 50.8 ± 31.1 mths (TAC)<br><b>Age at Initiation:</b> 64.2 ± 32.2 mths (MMF), 72.2 ± 32.3 mths (TAC)<br><b>FU:</b><br>51 M, 21 F<br><b>Indications:</b> FRNS, SDNS | (max. 1g)<br><b>TAC:</b> 0.05-0.15 mg/kg/d in 2 divided doses; trough levels 5-10 ng/ml<br><b>Duration:</b> 12 mths<br><b>Other:</b> low-dose oral steroids                                         | <b>RR at 6 and 12 mths:</b><br>MMF: decreased from 2.56/6mths before MMF to 0.76/1 <sup>st</sup> 6 mths and 0.67/2 <sup>nd</sup> 6 mths (p<0.001)<br>TAC: decreased from 2.38/6mths to 0.41/ 1 <sup>st</sup> 6 mths and 0.42/ 2 <sup>nd</sup> 6 mths (p<0.001)<br><b>Steroid dose: decreased from 0.61 ± 0.06 mg/kg/d (MMF) to 0.66 ± 0.05 mg/kg/d (TAC) to 0.16 ± 0.02 mg/kg/d (MMF) to 0.17 ± 0.03 mg/kg/d.</b><br><b>AE:</b> MMF discontinued due to leucopenia/GIT symptoms and chickenpox 2/34; TAC discontinued due to severe infection/ refractory anemia 1 and neurologic symptoms 1/38; new onset of hypertension 2 (TAC).<br>Infections: 11.8% (MMF), 7.9% (TAC).<br>Reversible leucopenia (1 MMF, 1 TAC), acute kidney injury (1 MMF, no Tac) |
| <b>MMF vs. CSA – after RTX</b>                          |                                                                                                                                                     |                                    |                                                                                            |    |                                                                                                                                                                                                                                                     |                                                                                                                                                                                                     |                                                                                                                                                                                                                                                                                                                                                                                                                                                                                                                                                                                                                                                                                                                                                          |
| Fujinaga S 2013 [86]<br>Japan                           | Cyclosporine versus Mycophenolate mofetil for maintenance of remission of steroid-dependent nephrotic syndrome after a single infusion of rituximab | Prospective study<br>Single center | Cyclosporine<br>Mycophenolate mofetil<br>Rituximab<br>Steroid-dependent nephrotic syndrome | 29 | <b>CsA after RTX:</b> n=13<br><b>MMF after RTX:</b> n=16<br><b>Age at onset of NS:</b> 6.4 ± 3.9 yrs<br><b>Age at RTX:</b> 11.8 ± 4.3 yrs<br><b>FU:</b><br>19M, 10 F<br><b>Indication:</b> severe SDNS                                              | <b>RTX:</b> Single dose of 375 mg/m <sup>2</sup> (max. 500 mg)<br><b>Duration of B-cell depletion:</b> 5 mths<br><b>After RTX:</b><br><b>CsA group:</b> dose adjusted to C2 level of 400-500 ng/ml; | <b>Relapse after RTX:</b><br>CsA: 3/13<br>MMF: 12/16<br><b>Treatment failure:</b><br>CsA: 2/13<br>MMF: 7/16<br><b>RR:</b><br>CsA: decrease from 4.4 ± 1.9 to 0.6±1.4/yr (86%.                                                                                                                                                                                                                                                                                                                                                                                                                                                                                                                                                                            |

| 1 <sup>st</sup> author, year, [Ref.], country of origin | Title of Publication                                                                                                                                | Study design                       | Key words                                | N  | Population Characteristics                                                                                                                                                                                                                                                                                     | Treatment                                                                                                                                                                                                                                                                | Outcomes                                                                                                                                                                                                                                                                                                                                                                                                                                                                                                                                                                                                                                                                                                                                                                                                                                                                                             |
|---------------------------------------------------------|-----------------------------------------------------------------------------------------------------------------------------------------------------|------------------------------------|------------------------------------------|----|----------------------------------------------------------------------------------------------------------------------------------------------------------------------------------------------------------------------------------------------------------------------------------------------------------------|--------------------------------------------------------------------------------------------------------------------------------------------------------------------------------------------------------------------------------------------------------------------------|------------------------------------------------------------------------------------------------------------------------------------------------------------------------------------------------------------------------------------------------------------------------------------------------------------------------------------------------------------------------------------------------------------------------------------------------------------------------------------------------------------------------------------------------------------------------------------------------------------------------------------------------------------------------------------------------------------------------------------------------------------------------------------------------------------------------------------------------------------------------------------------------------|
| Fujinaga S 2015 [87], Japan                             | Positive role of rituximab in switching from cyclosporine to mycophenolate mofetil for children with high-dose steroid-dependent nephrotic syndrome | Prospective study<br>Single center | SDNS<br>Rituximab<br>Cyclosporine<br>MMF | 26 | <p><b>Age at NS onset:</b> 7.0 ± 4.0 yrs<br/> <b>Age at CSA:</b> 8.3 ± 4.1 yrs<br/> <b>Age at MMF:</b> 12.1 ± 4.0 yrs<br/> <b>FU:</b> after MMF start: 28.8 ± 9.9 mths<br/> 16M, 10F<br/> <b>Indication:</b> complicated SDNS despite CSA (for 46.5±27.2 mths), CSAN in 11 pts (42%) with CSA &gt; 24 mths</p> | <p><b>MMF</b> started at initial dose 250 mg/12h, adjusted to MPA trough level of 2-5 µg/ml (max: 1g bd).<br/> After MMF start; CSA dosage gradually tapered<br/> Duration:<br/> Other: tapering dose of steroids, steroids fro relapses.<br/> <b>In case of MMF</b></p> | <p>p&lt;0.01)<br/> MMF: decrease from 2.3±0.8 to 1.0±0.9yr (58%; p&lt;0.01)<br/> <b>Steroid dose:</b><br/> CSA: decrease from 0.35±0.16 to 0.057±0.14 mg/kg/day (p&lt;0.01)<br/> MMF: decrease from 0.38±0.26 to 0.15±0.21 mg/kg/d (p&lt;0.01)<br/> <b>Dose of agent after RTX:</b><br/> CSA: decrease from 4.6 to 3.7 mg/kg/d (21%, p&lt;0.01).<br/> MMF:<br/> <b>AE:</b><br/> RTX: transient infusion reaction: 13/29 (45%), CSA. Hypertichosis all. Mild CSAN 3<br/> MMF: diarrhea 2, bacterial pneumonia 1<br/> <b>Remission</b> despite CSA withdrawal: 11/26 (42%)<br/> <b>MMF Failure and RTX:</b> 11/26 (42%)<br/> <b>Sustained remission &gt; 1 yr</b> without steroids: 22/26 (85%)<br/> <b>Discontinuation of MMF:</b> 15/26 (58%)<br/> <b>RR:</b> with CSA: 1.0±0.9/yr; with MMF and RTX 0.7±0.5/yr (p=0.07)<br/> <b>AE:</b> MMF: mild gastrointestinal symptoms 2, herpes simplex 2</p> |

| 1 <sup>st</sup> author, year, [Ref.], country of origin | Title of Publication                                                                            | Study design               | Key words                                                              | N                           | Population Characteristics                                                                                                                                                                                                                                                                                                                                                                                                                                                                                                                                                                                                              | Treatment                                                                                                                                                                                                                                                            | Outcomes                                                                                                                                                                                                                                                                                                                                                                                                                                                                                                                                                                                                                                                                                                             |
|---------------------------------------------------------|-------------------------------------------------------------------------------------------------|----------------------------|------------------------------------------------------------------------|-----------------------------|-----------------------------------------------------------------------------------------------------------------------------------------------------------------------------------------------------------------------------------------------------------------------------------------------------------------------------------------------------------------------------------------------------------------------------------------------------------------------------------------------------------------------------------------------------------------------------------------------------------------------------------------|----------------------------------------------------------------------------------------------------------------------------------------------------------------------------------------------------------------------------------------------------------------------|----------------------------------------------------------------------------------------------------------------------------------------------------------------------------------------------------------------------------------------------------------------------------------------------------------------------------------------------------------------------------------------------------------------------------------------------------------------------------------------------------------------------------------------------------------------------------------------------------------------------------------------------------------------------------------------------------------------------|
| <b>MMF - LEV - TAC</b><br>Basu 2017 [91]<br>India       | Long-term efficacy and safety of common steroid sparing agents in idiopathic nephrotic syndrome | Retrospective cohort study | Nephrotic Syndrome<br>Mycophenolate mofetil<br>Levamisol<br>Tacrolimus | Total<br>340,<br>MMF<br>130 | LEV: n=129<br><b>Age at NS onset:</b> 76.8 ± 32.0 mths<br><b>Age at LEV:</b> not stated<br><b>Duration of NS:</b> 3.3 ± 2.1 yrs<br><b>FRNS/SDNS:</b> 78/51<br><br><b>MMF:</b> n=130<br><b>Age at NS onset:</b> 85.2 ± 28.8 mths<br><b>Duration of NS:</b> 3.4 ± 2.6 yrs<br><b>FRNS/SDNS:</b> 74/56<br><br><b>TAC:</b> n=81<br><b>Age at NS onset:</b> 79.2 ± 26.2 mths<br><b>Duration of NS:</b> 3.1 ± 1.6 yrs <sup>†</sup><br><b>FRNS/SDNS:</b> 47/34<br><br><b>FU:</b> at least 30 mths<br>210M, 130F<br><b>Indications:</b> SDNS (preferred MMF or TAC), FRNS (preferred LEV or MMF), no previous exposure to steroid-sparing agents | LEV: 2.5 mg/kg on alternate days<br>Or<br>MMF: 1200 mg/m <sup>2</sup> daily<br>Or<br>Tacrolimus 0.1-0.2 mg/kg/d<br><br><b>Duration:</b> steroid-sparing agent continued for 1 yr following complete stop of steroids<br><b>Other:</b> oral steroids in tapering dose | <b>Change in relapse rate at 12 mths from previous year:</b><br>LEV: -3.1 ± 1.1<br>MMF: -4.5 ± 1.3<br>TAC: -5.1 ± 1.3<br>All p<0.001 relative to pre-study period.<br><b>RR at 12 mths and 24 mths (after stop of agent)</b><br>LEV: 1.7/yr; 2.8/yr<br>MMF: 0.9/yr; 1.4/yr<br>TAC: 0.9/yr; 1.8/yr<br><b>Relapse-free survival at 30 mths:</b><br><b>TAC vs. MMF:</b> 61.7 vs. 38.5%, p<0.001<br><b>TAC vs. LEV:</b> 61.7% vs. 24%, p<0.0001<br><b>Time to relapse:</b><br>LEV: 21 days<br>MMF: 23 days<br>TAC: 26 days<br><b>Cumulative predn. dose at 12 mths:</b><br><b>TAC vs MMF and LEV:</b> 82.7 ± 26.4 mg/kg/yr vs. 136.8±65.4 mg/kg/yr and 108.8 ± 35.7 mg/kg/yr (p<0.001)<br><b>Cum. pred. dose between</b> |
|                                                         |                                                                                                 |                            |                                                                        |                             |                                                                                                                                                                                                                                                                                                                                                                                                                                                                                                                                                                                                                                         | <b>treatment failure:</b><br><b>RTX</b> (n=11): single dose of 375 mg/m <sup>2</sup> (max. 500 mg)<br><b>Duration:</b><br><b>Other:</b> tapering dose of steroids, steroids for relapse                                                                              | RTX: mild infusion reactions 5/11, late-onset neutropenia requiring G-CSF 1/11                                                                                                                                                                                                                                                                                                                                                                                                                                                                                                                                                                                                                                       |



| 1 <sup>st</sup> author, year, [Ref.], country of origin | Title of Publication                                                                 | Study design               | Key words                                                         | N   | Population Characteristics                                                                           | Treatment                                                                                                                         | Outcomes                                                                                                                                                                                                                                                                                                                                                                                                                                                                                                                                                                                                                                                                                                                                                                                                                         |
|---------------------------------------------------------|--------------------------------------------------------------------------------------|----------------------------|-------------------------------------------------------------------|-----|------------------------------------------------------------------------------------------------------|-----------------------------------------------------------------------------------------------------------------------------------|----------------------------------------------------------------------------------------------------------------------------------------------------------------------------------------------------------------------------------------------------------------------------------------------------------------------------------------------------------------------------------------------------------------------------------------------------------------------------------------------------------------------------------------------------------------------------------------------------------------------------------------------------------------------------------------------------------------------------------------------------------------------------------------------------------------------------------|
| <b>CsA/Tac – CPA – LEV - MMF</b>                        |                                                                                      |                            |                                                                   |     |                                                                                                      |                                                                                                                                   |                                                                                                                                                                                                                                                                                                                                                                                                                                                                                                                                                                                                                                                                                                                                                                                                                                  |
| Moorani 2019 [92]<br>Pakistan                           | Immunosuppressive therapy in children with primary nephrotic syndrome: single center | Retrospective chart review | Nephrotic syndrome<br>Minimal change disease<br>Oral prednisolone | 130 | <b>CPA:</b> n=70<br><b>CsA:</b> n=49<br><b>LEV:</b> n=55<br><b>MMF:</b> n=21<br><b>CsA+MMF:</b> n=12 | <b>Sequential use:</b><br><b>CPA:</b> 2-3 mg/kg/d for 8-12 wks (2 <sup>nd</sup> line)<br><b>CNI:</b> (3 <sup>rd</sup> line), dose | <b>Remission (complete; partial) at 6 mths:</b><br>CPA: 45/70; 13/70<br>CsA: 30/49; 18/49<br>LEV: effective 44/55                                                                                                                                                                                                                                                                                                                                                                                                                                                                                                                                                                                                                                                                                                                |
|                                                         |                                                                                      |                            |                                                                   |     |                                                                                                      |                                                                                                                                   | <b>18-30 mths:</b><br><b>MMF vs. TAC and LEV:</b><br>74.4 mg/kg/yr vs. 96.4 mg/kg/yr (p=0.004); 74.4 vs. 117.6 mg/kg/yr (p<0.001).<br><b>Predictors for relapse:</b><br>SDNS vs. FRNS: HR 2.14 (95% CI 1.79-2.96, p<0.001)<br><b>AE:</b><br>LEV (n=3): malaria 1, transient mood changes 2<br>MMF (n=15): minor, temporary reduction of dose 3, acute resp. infec. 3, UTI 1, acute hepatitis 1, abdominal chronic pain 2, rec. vomiting 1, raised liver enzymes 1, muscle pain 1<br>TAC (n=33): temporary drug discontinuation 8, complete drug stop: 1<br>SAE: gram-pos. pneumonia with admission 2, gram-neg. peritonitis 1, pancreatitis 1<br>Minor: 5 acute resp. inf., gastroenteritis 4, UTI 2, herpes simplex 1, abscess 2, stomatitis 2, convulsion 1, alopecia 2, hirsutism 1, eczema 2, hyperglycaemia 3, leukopenia 2 |

| 1 <sup>st</sup> author, year, [Ref.], country of origin | Title of Publication          | Study design | Key words                                                                 | N | Population Characteristics                                                                                                                                                                                                                 | Treatment                                                                                                                                                                                 | Outcomes                                                                                                                                                                                                                                                                                                                                                                                                                                                                     |
|---------------------------------------------------------|-------------------------------|--------------|---------------------------------------------------------------------------|---|--------------------------------------------------------------------------------------------------------------------------------------------------------------------------------------------------------------------------------------------|-------------------------------------------------------------------------------------------------------------------------------------------------------------------------------------------|------------------------------------------------------------------------------------------------------------------------------------------------------------------------------------------------------------------------------------------------------------------------------------------------------------------------------------------------------------------------------------------------------------------------------------------------------------------------------|
|                                                         | experience, Karachi, Pakistan |              | Levamisole<br>Cyclophosphamide<br>Cyclosporin<br>Mycophenolate<br>mofetil |   | <p><b>TAC+/-MMF</b> n=11</p> <p><b>Age at NS onset:</b> 4.78 ± 3.23 yrs</p> <p><b>Age at medication:</b> not stated</p> <p><b>FU:</b> not stated, at least 6 mths</p> <p><b>Indication:</b> SDNS (n=55), FRNS (n=75), steroid toxicity</p> | <p>not stated</p> <p><b>LEV:</b> 2-2.5 mg/kg on a.d. for 6-24 mths (1<sup>st</sup> line)</p> <p><b>MMF:</b> (3<sup>rd</sup> line): dose not stated</p> <p><b>Other:</b> oral steroids</p> | <p>MMF: 4/21; 16/21</p> <p>CsA+MMF: 4/12; 7/12, CSA dependent 9/12</p> <p><b>Outcome last FU:</b></p> <p>Compl. Rem. Off treatment: 65/130</p> <p>Compl. Rem. ON treatment: 34/130</p> <p>Partial rem. ON treatment: 12/130</p> <p><b>AE:</b></p> <p>CPA: severe infection (disseminated chicken pox 9, BMS 5, alopecia 3)</p> <p>CsA: gum hyperplasia 5, hypertrichosis 6, renal dysfunction 7, deafness 1</p> <p>LEV: pancytopenia 1, allergic rash 1</p> <p>MMF: none</p> |

**Table S8.4: Levamisole (LEV)**

| 1 <sup>st</sup> author, year, [Ref.], country of origin | Title of Publication                                                                                                   | Study design                        | Keywords                                                                         | N  | Population characteristics                                                                                                                                                                         | Treatment                                                                                                                                                                                                                                 | Outcomes                                                                                                                                                                                                                                                                                              |
|---------------------------------------------------------|------------------------------------------------------------------------------------------------------------------------|-------------------------------------|----------------------------------------------------------------------------------|----|----------------------------------------------------------------------------------------------------------------------------------------------------------------------------------------------------|-------------------------------------------------------------------------------------------------------------------------------------------------------------------------------------------------------------------------------------------|-------------------------------------------------------------------------------------------------------------------------------------------------------------------------------------------------------------------------------------------------------------------------------------------------------|
| <b>LEVAMISOLE (LEV)</b>                                 |                                                                                                                        |                                     |                                                                                  |    |                                                                                                                                                                                                    |                                                                                                                                                                                                                                           |                                                                                                                                                                                                                                                                                                       |
| Fu 2000 [1141]<br>Taiwan                                | Levamisole in steroid-sensitive nephrotic syndrome: children with steroid-dependency and/or frequent relapses          | Prospective single center study     | SDNS<br>Levamisol<br>Children<br>relapse                                         | 27 | <b>Age at NS onset:</b><br><b>Age at LEV:</b> FU: 12.2 (6-24) mths<br><b>Indications:</b> SDNS, FRNS                                                                                               | <b>LEV:</b> 2-3 mg/kg daily or a.d., depending on patients response<br><b>Duration:</b><br><b>Other:</b> oral steroids in tapering dose                                                                                                   | <b>Relapses:</b> 20/27<br><b>RR:</b> decreased from 5.74 ± 3.24/yr to 1.91 ± 2.0/yr (p<0.05)<br><b>Steroid dose:</b> decreased from 0.62±0.42 mg/kg/d to 0.21 ± 0.35 mg/kg/d (p<0.05)<br><b>AE:</b> transient leukopenia 7                                                                            |
| Ashaya 2002 [1151]<br>Saudi Arabia                      | Levamisole treatment in steroid sensitive nephrotic syndrome                                                           | Retrospective e single center study | SDNS<br>Levamisol<br>Children<br>relapse                                         | 9  | <b>Age at NS onset:</b><br><b>Age at LEV:</b> 6 (3.5-10) yrs<br><b>FU:</b><br><b>Indications:</b>                                                                                                  | <b>LEV:</b> 3 mg/kg/48 hrs<br><b>Duration:</b> 6-24 mths<br><b>Other:</b> oral steroids in tapering dose                                                                                                                                  | <b>Remarkable reduction in no. of relapses and the steroid maintenance dose:</b> 4/9<br><b>AE:</b> no significant observed                                                                                                                                                                            |
| Only abstract available                                 |                                                                                                                        |                                     |                                                                                  |    |                                                                                                                                                                                                    |                                                                                                                                                                                                                                           |                                                                                                                                                                                                                                                                                                       |
| Donia A 2002 [1161]<br>Egypt                            | Levamisole: Adjunctive therapy in steroid-dependent minimal change nephrotic children                                  | Prospective single center study     | Levamisole<br>Children<br>Steroid dependent<br>Minimal change nephrotic syndrome | 20 | <b>Age at NS onset:</b> 7.4 ± 2.89 yrs<br><b>Age at LEV:</b> not stated<br><b>FU:</b> 12 mths<br>16 M, 4 F<br><b>Indications:</b> SDNS with steroid toxicity, no previous steroid-sparing agent    | <b>LEV:</b> 2.5 mg/kg a.d.<br><b>Duration:</b> 6 mths<br><b>Other:</b> oral steroids in tapering dose                                                                                                                                     | <b>Remission at 6 mths (end of LEV)/ 12 mths (6-mths off-LEV):</b> 11/20 (55%)/ 5/20 (25%)<br>Relapses during 12 mths study period: 15/20 (75%)<br><b>Time to relapse:</b> 6.83 (0.23-11.67) mths<br><b>AE:</b> no significant observed                                                               |
| Al-Ibrahim 2003 [1171]<br>Saudi-Arabia                  | Levamisole therapy as a second-line immunosuppressive agent in corticosteroid-sensitive nephrotic syndrome in children | Retrospective e chart review        | Nephrotic syndrome<br>Steroid-sensitive,<br>levamisole,<br>cyclophosphamide      | 24 | <b>Age at NS onset:</b> 32 mths (range 18 mths to 9.5 yrs)<br><b>Age at LEV:</b> not stated<br><b>FU:</b> range 18 mths to 5 yrs<br>18M, 6 F<br><b>Indications:</b> SDNS (13, 54%), FRNS (11, 46%) | <b>LEV:</b> 2.5 mg/kg a.d.<br><b>Duration:</b> min. 8 mths, mean 8.5 mths<br><b>Other:</b> prednisolone a.d. in tapering dose for min. 8 mths.<br>Non-responder to LEV after 6 mths (7) and relapsers after LEV has been stopped (6): CPA | <b>LEV:</b><br><b>Remission:</b> 17/24 (71%)<br><b>Sustained remission (&gt;6mths, mean 19.4 mths):</b> 11/17 after LEV stopped<br><b>RR:</b> decreased from 4 (3.5-5)/year to 1.3 (0-2)/yr in 17 responders<br><b>AE (LEV):</b> mild transient rash 2, mild GI symptomatic 2, transient leucopenia 1 |

| 1 <sup>st</sup> author, year, [Ref.], country of origin | Title of Publication                                                                                | Study design                      | Keywords                                                                                    | N  | Population characteristics                                                                                                                                                                                                                                                                                                                                               | Treatment                                                                                                                                                                                                           | Outcomes                                                                                                                                                                                                                                                                                                                                                                                                                                                                                                                                                                          |
|---------------------------------------------------------|-----------------------------------------------------------------------------------------------------|-----------------------------------|---------------------------------------------------------------------------------------------|----|--------------------------------------------------------------------------------------------------------------------------------------------------------------------------------------------------------------------------------------------------------------------------------------------------------------------------------------------------------------------------|---------------------------------------------------------------------------------------------------------------------------------------------------------------------------------------------------------------------|-----------------------------------------------------------------------------------------------------------------------------------------------------------------------------------------------------------------------------------------------------------------------------------------------------------------------------------------------------------------------------------------------------------------------------------------------------------------------------------------------------------------------------------------------------------------------------------|
| Simegi 2004 [118] Hungary                               | Long-term effects of levamisole treatment in childhood nephrotic syndrome                           | Retrospective single center study | Nephrotic Syndrome<br>Levamisole<br>Prednisolone<br>Relapse rate<br>Cumulative steroid dose | 34 | <b>Age at NS onset:</b> not stated<br><b>Age at LEV:</b> not stated<br><b>FU:</b> 60 mth<br>21 M, 13 F<br><b>Indications:</b> FRNS (n=15), SSNS (n=13), 6 developed secondary SRNS before LEV; 19/34 with previous steroid-sparing agents: CPA 9, CHL 10), steroid toxicity                                                                                              | <b>LEV:</b> 2 mg/kg/day<br><b>Duration:</b> 17 ± 7 mths (range 5-36 mths)<br><b>Other:</b> oral steroids in tapering dose                                                                                           | <b>CPA after LEV:</b><br>Sustained remission for mean of 10 mths: 8/13<br><b>AE (CPA after LEV):</b> transient leucopenia 3<br><b>Relapses:</b> 11/34 during LEV, another 6 post-LEV<br><b>RR:</b> fell from 4.41/yr to 0.41/yr by the end of LEV (p<0.001); 0.22/yr in FU-period of 24 mths post-LEV<br><b>Cumulative steroid dose:</b> decreased from 7564.1 ± 3467.1 mg/yr to 1472±729.9 mg/yr (p<0.0001);<br>Steroids were stopped in 23/34 pts.<br><b>Time to relapse:</b><br><b>AE:</b> reversible neutropenia 5/34, requiring intermittent LEV stop, re-start was possible |
| Fu 2004 [119] Taiwan                                    | Levamisole in steroid-sensitive nephrotic syndrome with frequent relapses and/or steroid dependency | Prospective single center study   | Levamisole<br>Steroid-sensitive nephrotic syndrome<br>Steroid dependency                    | 36 | LEV every other day: n=20<br>LEV daily after relapse after 3 mths: n=16<br><b>Age at NS onset:</b><br>Group 1: 4.58 ± 3.15 yrs<br>Group 2: 5.85 ± 3.32 yrs<br><b>Age at LEV:</b><br>Group 1: 8.02 ± 5.31 yrs<br>Group 2: 8.82 ± 5.12 yrs<br><b>FU:</b> 20.4 ± 9.2 mths<br>25 M, 11 F<br><b>Indication:</b> SDNS (22), FRNS (14), of those 11 with previous CPA treatment | <b>LEV:</b><br>Group 1: 2-3 mg/kg every other day for 4-24 mths<br>Group 2: 3 mths every other day, then mths changed to daily for 6 mths (n=11) or 4-18 mths (n=5)<br><b>Other:</b> oral steroids in tapering dose | <b>Relapses after therapy:</b><br>Group 1: 4.82 ± 3.15 vs. 2.01 ± 2.5 (p<0.05)<br>Group 2: 5.97 ± 3.38 vs. 1.34 ± 2.1 (p<0.05)<br><b>Pred. dose – reduction:</b><br>Group 1: 0.57 ± 0.37 vs. 0.15 ± 0.33 mg/kg/day (p<0.05)<br>Group 2: 0.61 ± 0.42 vs. 0.19 ± 0.35 mg/kg/day (p<0.05)<br><b>Discontinuation of LEV:</b><br>Group 1: 6. Group: 4 after 15-24 mths<br><b>AE:</b> Transient leukopenia: 9/36                                                                                                                                                                        |
| Hafeez F 2006 [120] Pakistan<br>Only                    | Levamisole in steroid dependent and frequently relapsing nephrotic                                  | Retrospective single center       |                                                                                             | 70 | <b>Age at NS onset:</b> 5.50 ± 2.97 yrs<br><b>Age at LEV:</b> not stated<br><b>FU:</b> at least 1 yr<br><b>M/F ratio:</b> 4:1                                                                                                                                                                                                                                            | <b>LEV:</b> 2.5 mg/kg a.d.<br><b>Duration:</b> 1 yr<br><b>Other:</b> oral steroids in tapering dose                                                                                                                 | <b>Remission:</b> No relapses on LEV 19/70 (27.1%); ineffective 11/70 (15.7%)<br><b>Relapses:</b> 40/70 (57.1%) on LEV<br><b>Steroid dose:</b> significantly                                                                                                                                                                                                                                                                                                                                                                                                                      |

| 1 <sup>st</sup> author, year, [Ref.], country of origin | Title of Publication                                                                              | Study design                    | Keywords                                                                                           | N   | Population characteristics                                                                                                                                                                                                          | Treatment                                                                                                                                          | Outcomes                                                                                                                                                                                                                                                                                                                                                                                                                                                                                                                                                                                                                     |
|---------------------------------------------------------|---------------------------------------------------------------------------------------------------|---------------------------------|----------------------------------------------------------------------------------------------------|-----|-------------------------------------------------------------------------------------------------------------------------------------------------------------------------------------------------------------------------------------|----------------------------------------------------------------------------------------------------------------------------------------------------|------------------------------------------------------------------------------------------------------------------------------------------------------------------------------------------------------------------------------------------------------------------------------------------------------------------------------------------------------------------------------------------------------------------------------------------------------------------------------------------------------------------------------------------------------------------------------------------------------------------------------|
| Boyer O 2008 [121] France                               | Short- and long-term efficacy of levamisole as adjunctive therapy in childhood nephrotic syndrome | Prospective single center study | Children<br>Pediatric<br>Minimal-change<br>disease<br>Steroids<br>Side effects<br>Growth<br>Height | 10  | <b>Age at NS onset:</b> 4.3 (1.4-12.8) yrs<br><b>Median duration of NS:</b> 6.4 (2.1-10.3) yrs<br><b>Age at LEV:</b> not stated<br><b>FU:</b> not stated, at least 2 yrs after LEV start<br><b>Indications:</b> SDNS<br>6M, 4F      | <b>LEV:</b> 2.5 mg/kg 3 alternate days a week (Mo-Wed-Fri)<br><b>Duration:</b> 12 mths<br><b>Other:</b> oral steroids in tapering dose if required | reduced<br><b>AE:</b> transient rash, occasional vomiting<br><b>Relapse-free:</b> 6/10 during LEV, 5/10 off-LEV<br><b>Relapse frequency:</b><br>Fell from 6.0 (4.0-9.0)/pt./yr pre-LEV to 0 (0.0-4.0)/pt./yr. on LEV (p=0.002) and was 0.5 (0.0-8.0)/pt./yr. 1 year post-LEV (p=0.002)<br><b>Cumulative pred. dose/year:</b><br>Fell from 6,067 (1,660-5,271) mg/m <sup>2</sup> /yr to 2,920 (782-5,271) on LEV and was 716 (0-3,367) off-LEV.<br><b>Median height velocity:</b><br>improved from 3.0 (0.3-6.0)cm/yr to 3.7 (0.0-8.0) (p=0.058) on LEV and 5.4 (0.0-9.1) post-LEV (p=0.19)<br><b>AE:</b> no serious reported |
| Madani A 2010 [122] Iran                                | Effect of levamisole in steroid-dependent nephrotic syndrome                                      | Retrospective single center     | Levamisole<br>Steroids<br>Nephrotic syndrome<br>Immunosuppressive agents                           | 304 | <b>Age at NS onset:</b> 4.8 ± 3.1 yrs<br><b>Age at LEV:</b><br><b>FU:</b> at least 6 mths; 6.7 ± 3.9 yrs<br>208 M, 96 F<br><b>Indications:</b> SDNS, FRNS, previous treatment in 62 (20.4%) pts. with CPA (18.1%) and/or CSA (7.2%) | <b>LEV:</b> 2.5 mg/kg a.d.<br><b>Duration:</b> 17.87 ± 11.22 mths<br><b>Other:</b> oral steroids in tapering dose                                  | <b>Remission:</b><br>84/304 (27.6%)<br><b>RR:</b> decreased from 2.02 ± 1.2/yr to 0.92 ± 0.98/yr on LEV and 1.07 ± 1.2/yr 1 yr post-LEV<br><b>Steroid dose:</b> reduction by 53.24 ± 45.97%<br><b>Rate of LEV resistance:</b><br>LEV as 1 <sup>st</sup> agent: 31.4%<br>LEV as 2 <sup>nd</sup> /3 <sup>rd</sup> agent: 42.5% (CPA), 57.1% (CSA), 46.7% (both)<br><b>AE:</b> in 2, both reversible, neutropenia 1, vertigo 1                                                                                                                                                                                                  |
| Elmas AT 2013 [123] Turkey                              | Short- and long-term efficacy of levamisole in children with                                      | Retrospective study             | Child<br>Levamisole<br>Frequently relapsing                                                        | 29  | <b>Age at NS onset:</b> 4.0 (2.0-12.0) yrs<br><b>Age at LEV:</b> 9.0 (4.0-16.0) yrs<br><b>Duration of NS:</b> 5.0 (1.5-14.0)                                                                                                        | <b>LEV:</b> 2.5 mg/kg 3 alternate days<br><b>Duration:</b> 12 mths<br><b>Other:</b> oral steroids in                                               | <b>Relapse free:</b> 23/29 during LEV<br><b>Sustained remission 1r end-LEV:</b> 18/29<br><b>RR:</b> fell from 4.0 (3.0-8.0)/yr pre-                                                                                                                                                                                                                                                                                                                                                                                                                                                                                          |

| 1 <sup>st</sup> author, year, [Ref.], country of origin | Title of Publication                                                                              | Study design                                  | Keywords                                                      | N  | Population characteristics                                                                                                                                                                                                                                                                                           | Treatment                                                                                                                                                                               | Outcomes                                                                                                                                                                                                                                                                                                                                                                                            |
|---------------------------------------------------------|---------------------------------------------------------------------------------------------------|-----------------------------------------------|---------------------------------------------------------------|----|----------------------------------------------------------------------------------------------------------------------------------------------------------------------------------------------------------------------------------------------------------------------------------------------------------------------|-----------------------------------------------------------------------------------------------------------------------------------------------------------------------------------------|-----------------------------------------------------------------------------------------------------------------------------------------------------------------------------------------------------------------------------------------------------------------------------------------------------------------------------------------------------------------------------------------------------|
| Ekambaram S [124] 2014 India                            | Efficacy of levamisole in children with frequently relapsing and steroid-dependent syndrome       | Retrospective e chart review<br>Single center | Treatment Steroids<br>Outcome Relapse<br>Nephrotic syndrome   | 97 | <b>Age at NS onset:</b> SDNS: 2.5 ± 1.1 yrs<br>FRNS: 3.1 ± 1.8 yrs<br><b>Age at LEV:</b> SDNS: 3.9 ± 1.7 yrs<br>FRNS: 4.8 ± 2.3 yrs<br><b>FU:</b> at least 6 mths<br>53 M, 44 F<br><b>Indications:</b> SDNS (35, 36%), FRNS (62, 64%)                                                                                | <b>LEV:</b> 2 mg/kg daily<br><b>Duration:</b> at least 6 mths (18.7 ± 6.4 mths); 1 yr (n=65)<br><b>Other:</b> oral steroids in tapering dose, stopped after 11.84 ± 1.3 mths.           | <b>Relapse-free</b> at 1yr post-therapy (n=34): 25/34 (73.5%) during treatment, 22/34 (64.7%) 1 yr post-LEV.<br><b>RR:</b> fell from 2.41 ± 0.5/year to 1.3 ± 0.7/year on LEV and to 0.48 ± 0.8/yr post-LEV<br><b>Cumulative steroid dose:</b> reduced from 4109.29 ± 1154 mg/m <sup>2</sup> /yr to 2491.8 ± 694 on LEV and to 660.7 ± 10.7 mg/m <sup>2</sup> /yr post-LEV<br><b>AE:</b> not stated |
| Kuzma-Mroczkowski a E, 2016 [125] Poland                | Levamisole therapy in children with frequently relapsing and steroid-dependent nephrotic syndrome | Retrospective e single center chart review    | Children Immunomodulation<br>Nephrotic syndrome<br>Levamisole | 53 | <b>Age at NS onset:</b> 3.1 ± 2.0 yrs<br><b>Age at LEV:</b> 6.5 ± 3.0 yrs<br><b>Duration of NS:</b> 3.4 ± 2.9 yrs<br><b>FU:</b> 31 M, 22 F<br><b>Indications:</b> FRNS, SDNS, steroid toxicity, previous treatments with MP pulses (13, 24.5%), CPA (10, 18.9%), CHL 8 (15.1%), CSA 1 (1.9%), Azathioprine (1, 1.9%) | <b>LEV:</b> 2.5 mg/kg a.d. for 1 mth, then twice weekly<br><b>Duration:</b> at least 6 mths, 15.0 ± 7.3 mths<br><b>Other:</b> oral steroids in tapering dose (duration: 8.7 ± 8.5) mths | <b>Relapses during LEV:</b> 34/53 (64.2%), of those 23 during 1 <sup>st</sup> 6 mths of LEV<br><b>Time to 1<sup>st</sup> relapse:</b> 8.8 ± 8.1 mths<br><b>RR:</b> fell from 2.7 ± 2.0 /yr to 1.8 ± 2.1/yr (p=0.02).<br><b>AE:</b> in 16, all transient; allergic rash 9, abdominal pain 3, hypertransaminasemia 3, arthralgia 2, leukopenia 1, thrombocytopenia 1                                  |
| Abeyagunawardena AS, 2017 [126]                         | Efficacy of higher-dose levamisole in maintaining remission in                                    | Single center pilot study                     | Low-dose levamisol Steroid-dependent                          | 58 | <b>Age at NS onset:</b> 7.95 yrs<br><b>Age at LEV:</b> not stated<br><b>FU:</b> at least 12 mths<br>33 M, 25 F                                                                                                                                                                                                       | <b>LEV:</b> 2.5 mg/kg daily<br><b>Duration:</b> 1yr<br><b>Other:</b> low-dose alternate day predn. for 1                                                                                | <b>Relapse-free within 12 mths:</b> 12/58 (20.7%)<br><b>Relapses at 12 mths:</b> A.d. LEV: 2.8 ± 0.8/yr                                                                                                                                                                                                                                                                                             |

| 1 <sup>st</sup> author, year, [Ref.], country of origin              | Title of Publication                                                                                                                  | Study design                      | Keywords                                                                                                        | N     | Population characteristics                                                                                                                                                                                                     | Treatment                                                                                                                                                       | Outcomes                                                                                                                                                                                                                                                                                                                                                                                                                                                                                                                  |
|----------------------------------------------------------------------|---------------------------------------------------------------------------------------------------------------------------------------|-----------------------------------|-----------------------------------------------------------------------------------------------------------------|-------|--------------------------------------------------------------------------------------------------------------------------------------------------------------------------------------------------------------------------------|-----------------------------------------------------------------------------------------------------------------------------------------------------------------|---------------------------------------------------------------------------------------------------------------------------------------------------------------------------------------------------------------------------------------------------------------------------------------------------------------------------------------------------------------------------------------------------------------------------------------------------------------------------------------------------------------------------|
| Sri Lanka                                                            | steroid-dependent nephrotic syndrome                                                                                                  |                                   | nephrotic syndrome relapse                                                                                      |       | <b>Indications:</b> SDNS, patients on LEV a.d. +low-dose pred. and > 2 relapses during the 12 mths before enrolment; no use of other previous steroid-sparing agents                                                           | yr (0.1-0.6 mg/kg)                                                                                                                                              | Daily LEV: 1.3 ± 0.9/yr<br>P<0.001<br><b>Pred. dose:</b> 254.16 (210.68-281.81) (within 1 yr LEV a.d.) vs. 154.05 (116.75-197.0) mg/kg/yr (1 yr daily LEV)<br><b>AE:</b> no serious infections, minor infections not counted.                                                                                                                                                                                                                                                                                             |
| Kiruba 2017 [127]<br>India                                           | Levamisole in frequently-relapsing and steroid-dependent nephrotic syndrome                                                           | Retrospective chart review        | Corticosteroids<br>Immunomodulators<br>Proteinuria<br>Outcome<br>Treatment                                      | 95    | <b>Age at NS onset:</b><br>FRNS: 2.5 (1.9-4.0) yrs<br>SDNS: 2 (1.8-4.0) yrs<br><b>Age at LEV:</b><br>FRNS: 5 (3-8) yrs<br>SDNS: 6 (3-8) yrs<br><b>FU:</b> at least 1yr<br>55M, 40F<br><b>Indications:</b> FRNS (62), SDNS (33) | <b>LEV:</b> 2—2.5 mg/kg a.d., if failure (n=25) daily<br><b>Duration:</b> 24 mths<br><b>Other:</b> oral steroids in tapering dose                               | <b>Remission on LEV a.d.:</b><br>FRNS: 82%, SDNS: 58%<br><b>Remission on LEV a.d. and daily:</b> FRNS: 93.5%, SDNS 79%<br><b>No sustained rem. After LEV stop:</b> 41/84 (48.8%), requiring other agents, e.g. CPA (22), MMF (19)<br><b>RR:</b> decreased from 4.22 ± 0.46/yr to 1.35 ± 0.36/yr (p<0.01); increased to 2.57/yr after stop of LEV<br><b>Cumulative steroid dose:</b> reduced from 4200 (3200-4300) mg/m <sup>2</sup> to 1100 (500-2900) mg/m <sup>2</sup> (p<0.001).<br><b>AE:</b> no significant reported |
| Moorani K, 2020 [128]<br>Pakistan                                    | Efficacy of Levamisole in children with Frequent relapsing and steroid dependent nephrotic syndrome at tertiary care center - Karachi | Retrospective single center study | Remission of proteinuria<br>Frequent relapsing<br>Steroid dependent nephrotic syndrome<br>Relapses<br>Levamisol | 81    | <b>Age at NS onset:</b> 3.72 ± 2.33 yrs<br><b>Age at LEV:</b> 8.44±3.70 yrs<br><b>FU:</b> 11.70 ± 11.23 mths post-LEV<br>48 M, 33 F<br><b>Indications:</b> FRNS (n=66), SDNS (n=15)                                            | <b>LEV:</b> 2-2.5 mg/kg daily (48; 59.3%) or a.d. (33; 40.7%)<br><b>Duration:</b> 15.69 ± 9.39 mths (6-36 mths)<br><b>Other:</b> oral steroids in tapering dose | <b>RR:</b> fell from 3.30±0.50/yr to 0.98±1.1/yr during-LEV and to 0.79±1.27/yr post-LEV (p=0.001)<br><b>Cumulative steroid dose:</b> Pre-LEV: 3389±2785.22 mg/m <sup>2</sup> /yr<br>During LEV: 2471.71±2024.98<br>Post-LEV: 661.37±905.37 (p=0.001)<br><b>AE:</b> pancytopenia and allergic rash 1                                                                                                                                                                                                                      |
| <b>Studies with LEV – comparing different steroid-sparing agents</b> |                                                                                                                                       |                                   |                                                                                                                 |       |                                                                                                                                                                                                                                |                                                                                                                                                                 |                                                                                                                                                                                                                                                                                                                                                                                                                                                                                                                           |
| <b>LEV vs. CPA</b>                                                   |                                                                                                                                       |                                   |                                                                                                                 |       |                                                                                                                                                                                                                                |                                                                                                                                                                 |                                                                                                                                                                                                                                                                                                                                                                                                                                                                                                                           |
| Alsarani K 2001 [100]                                                | Levamisole vs. cyclophosphamid                                                                                                        | Retrospective analysis            | SDNS<br>Levamisol                                                                                               | Total | <b>LEV</b> n=24<br><b>CPA</b> n=27                                                                                                                                                                                             | <b>LEV:</b><br><b>CPA:</b>                                                                                                                                      | <b>RR:</b> Reduced by 0.28 relapses/patient/year ( <b>LEV</b> ) and                                                                                                                                                                                                                                                                                                                                                                                                                                                       |

| 1 <sup>st</sup> author, year, [Ref.], country of origin | Title of Publication                                                                     | Study design                      | Keywords                                                                                          | N                   | Population characteristics                                                                                                                                                                                                                                                                                                                                                             | Treatment                                                                                                                                                                                                                                                                   | Outcomes                                                                                                                                                                                                                                                                                                                                                                                                                                                                                                               |
|---------------------------------------------------------|------------------------------------------------------------------------------------------|-----------------------------------|---------------------------------------------------------------------------------------------------|---------------------|----------------------------------------------------------------------------------------------------------------------------------------------------------------------------------------------------------------------------------------------------------------------------------------------------------------------------------------------------------------------------------------|-----------------------------------------------------------------------------------------------------------------------------------------------------------------------------------------------------------------------------------------------------------------------------|------------------------------------------------------------------------------------------------------------------------------------------------------------------------------------------------------------------------------------------------------------------------------------------------------------------------------------------------------------------------------------------------------------------------------------------------------------------------------------------------------------------------|
| Canada<br>Only abstract available                       | e for frequently relapsing steroid-dependent syndrome                                    |                                   | cyclophosphamide<br>Children relapse                                                              | 51, LEV : 24        | <b>Age at NS onset:</b><br><b>Age at LEV:</b><br><b>FU:</b><br><b>Indications:</b>                                                                                                                                                                                                                                                                                                     | <b>Duration:</b><br><b>Other:</b>                                                                                                                                                                                                                                           | 0.32 relapses/pt-yr ( <b>CPA</b> )<br><b>Cumulative dose of pred.:</b> reduced by 336mg/m <sup>2</sup> /mth ( <b>LEV</b> ) and 387 mg/m <sup>2</sup> /month ( <b>CPA</b> ).<br><b>AE:</b>                                                                                                                                                                                                                                                                                                                              |
| <b>LEV - CPA/CHL - CSA</b>                              |                                                                                          |                                   |                                                                                                   |                     |                                                                                                                                                                                                                                                                                                                                                                                        |                                                                                                                                                                                                                                                                             |                                                                                                                                                                                                                                                                                                                                                                                                                                                                                                                        |
| Chen SY 2010 [90]<br>Taiwan                             | Treatment course of steroid-dependent nephrotic syndrome: emphasized on treatment effect | Retrospective single center study | Chlorambucil<br>Cyclophosphamide<br>Cyclosporine<br>Levamisol                                     | Total, 46, LEV : 15 | <b>LEV:</b> n=15<br><b>CHL:</b> n=22<br><b>CSA:</b> n=8<br><b>2<sup>nd</sup> CPA:</b> n=6<br><br><b>Age at NS onset:</b> 4.5 (1-15.5) yrs<br><b>Age at medication:</b> not stated<br><b>FU:</b> 96 (22-244) mths<br>33M, 13 F<br><b>Indications:</b> SDNS despite one course of CPA as 1 <sup>st</sup> line agent                                                                      | <b>LEV:</b> 2-3.3 mg/kg/day for 3-20 mths<br><b>CHL:</b> 0.1-0.2 mg/kg/d for 8 weeks<br><b>CSA:</b> 3.5-5 mg/kg/d for 6-14 mths, then tapering for 12-23 mths<br><b>2<sup>nd</sup> CPA:</b> 2-3 mg/kg/day for 8 wks<br><br><b>Other:</b> oral steroids in tapering dose     | <b>Relapses after 1<sup>st</sup> CPA course:</b> 25/46<br><b>Relapses after additional treatment:</b><br>LEV: 1/15 remission, 1 with SSNS relapses, 1 relapse-free period, 1 LEV dependency, 10 no response<br>CHL: 7/22 complete remission, 5 with relapses, 4 disease-free for 6.8 (2-11) mths, 3 no response<br>CSA: 1/8 rem., 1 with SSNS relapses, 1 disease-free period, 4 CSA dependency<br>2 <sup>nd</sup> CPA: 3/6 disease-free period, 1 decreased steroid threshold, 2 no response<br><b>AE:</b> not stated |
| Abeiyaguna wardena 2003 [89]<br>UK                      | The use of steroid-sparing agents in steroid-sensitive nephrotic syndrome                | Retrospective cohort study        | Nephrotic syndrome<br>Steroid sensitive<br>Corticosteroid Relapse<br>Remission<br>Steroid-sparing |                     | <b>CPA:</b> n=178 (1 <sup>st</sup> agent)<br><b>LEV:</b> n=113, of those 1 <sup>st</sup> agent n=65<br><b>CSA:</b> n=61 as 2 <sup>nd</sup> agent in SDNS following CPA treatment: 1 <sup>st</sup> agent n=8<br><b>Chlorambucil:</b> n=15 when other therapies failed<br><br><b>Age at NS onset:</b> not stated<br><b>FU:</b> 6.1 yrs (QR 1-17.4) yrs<br><b>Indications:</b> SDNS, FRNS | <b>CPA:</b> 3 mg/kg daily<br><b>Duration:</b> 8 wks<br><br><b>LEV:</b> 2.5 mg/kg on alternate days<br><b>Duration:</b> 3.2 (1-7) yrs<br><br><b>CSA:</b> 3-5 mg/kg in 2 divided doses (12htrough level 50-150 µg/l)<br><br><b>Other:</b> all: oral steroids in tapering dose | <b>CPA:</b> sustained remission at 1 yr: 94/178 (54%), at 2 yrs: 44%, at 5 yrs: 32%, 2 <sup>nd</sup> course of CPA: 18/178 (10%)<br><b>LEV:</b> sustained remission at 1 yr 19/65 (30%) as 1 <sup>st</sup> agent, relapse after stop of LEV 4. 32/48 (66%) with sustained remission when used after unsuccessful CPA<br><b>CSA:</b> 43/61 (70%) with sustained remission; relapse following discontinuation 32 (51%).<br><b>CHL:</b> sustained remission at 1 yr: 7.<br><b>AE:</b><br><b>CPA:</b> neutropenia 16/178,  |



| 1 <sup>st</sup> author, year, [Ref.], country of origin | Title of Publication                                                                                                                 | Study design                      | Keywords                                                                                         | N                 | Population characteristics                                                                                                                                                        | Treatment                                                                                                                                                                                                                                           | Outcomes                                                                                                                                                                                                                                                                                                                                                                                                                                                                                                                                                                                                                                                                                                                                                                                      |
|---------------------------------------------------------|--------------------------------------------------------------------------------------------------------------------------------------|-----------------------------------|--------------------------------------------------------------------------------------------------|-------------------|-----------------------------------------------------------------------------------------------------------------------------------------------------------------------------------|-----------------------------------------------------------------------------------------------------------------------------------------------------------------------------------------------------------------------------------------------------|-----------------------------------------------------------------------------------------------------------------------------------------------------------------------------------------------------------------------------------------------------------------------------------------------------------------------------------------------------------------------------------------------------------------------------------------------------------------------------------------------------------------------------------------------------------------------------------------------------------------------------------------------------------------------------------------------------------------------------------------------------------------------------------------------|
| <b>LEV – CPA – CSA – MMF</b>                            |                                                                                                                                      |                                   |                                                                                                  |                   |                                                                                                                                                                                   |                                                                                                                                                                                                                                                     |                                                                                                                                                                                                                                                                                                                                                                                                                                                                                                                                                                                                                                                                                                                                                                                               |
| Alsarani K, 2017 [129] Saudi Arabia                     | Experience with second line drugs in frequently relapsing and steroid dependent childhood nephrotic syndrome in a large Saudi center | Retrospective single center study | Levamisole Cyclophosphamide MMF Cyclosporine Steroid dependent Frequently relapsing Prednisolone | Tot al 60, LEV 20 | LEV: n=20<br>MMF: n=25<br>CPA: n=12<br>CSA: n=13<br><br>Age at NS onset: 3.75 ± 1.1 yrs<br>Age at drug start: 4.8 ± 1.0 yrs<br>FU:<br>M/F ratio: 1.9:1<br>Indications: SDNS, FRNS | LEV: 2.5 mg/kg/d for 1 yr<br>MMF: 1200 mg/m <sup>2</sup> /d in 2 divided doses for 1 yr<br>Oral CPA: 2 mg/kg/d for 12 weeks<br>CSA: 5 mg/kg/d in 2 divided doses for 1 yr (trough levels 80-100 mg/ml)<br><br>Other: oral steroids in tapering dose | RR (1yr pre; 1yr during; 1yr post-drug):<br>LEV: 3.6± 0.5/yr; 1.6± 0.6/yr; 1.0± 0.9/yr (p<0.0001)<br>MMF: 3.9± 0.6/yr; 1.5± 0.7/yr; 0.9± 0.8/yr (p<0.0001)<br>CPA: 4.0± 0.6/yr; 1.8± 0.7/yr; 1.3± 0.8/yr (p<0.0001)<br>CSA: 4.1± 0.4/yr; 1.5± 0.5/yr; 0.8± 0.7/yr (p<0.0001)<br><br>Cumulative dose of steroids<br>LEV: 4100±1500; 1700±650; ± 900±15 mg/m <sup>2</sup> /yr (p<0.0001)<br>MMF: 4300±1010; 1610±595; 850±20 mg/m <sup>2</sup> /yr (p<0.0001)<br>CPA: 3900±950; 1800±600; 920±18 mg/m <sup>2</sup> /yr (p<0.0001)<br>CSA: 4350±1100; 1510±600; 705±25 mg/m <sup>2</sup> /yr (p<0.0001)<br><br>AE:<br>LEV: transient neutropenia 4<br>MMF: diarrhea 3<br>CPA: transient neutropenia 3, hemorrhagic cystitis 1<br>CSA: mild hirsutism 13, gum hypertrophy 13, mild hypertension 4 |
| <b>LEV – MMF - TAC</b>                                  |                                                                                                                                      |                                   |                                                                                                  |                   |                                                                                                                                                                                   |                                                                                                                                                                                                                                                     |                                                                                                                                                                                                                                                                                                                                                                                                                                                                                                                                                                                                                                                                                                                                                                                               |
| Basu B,                                                 | Long-term efficacy                                                                                                                   | Retrospective                     | Nephrotic                                                                                        | Tot               | LEV: n=129                                                                                                                                                                        | LEV: 2.5 mg/kg on                                                                                                                                                                                                                                   | Change in relapse rate at 12                                                                                                                                                                                                                                                                                                                                                                                                                                                                                                                                                                                                                                                                                                                                                                  |

| 1 <sup>st</sup> author, year, [Ref.], country of origin | Title of Publication                                                         | Study design                    | Keywords                                                         | N                        | Population characteristics                                                                                                                                                                                                                                                                                                                                                                                                                                                                                                                                                                                   | Treatment                                                                                                                                                                                                                                          | Outcomes                                                                                                                                                                                                                                                                                                                                                                                                                                                                                                                                                                                                                                                                                                                                                                                                                                                                                                                                                                             |
|---------------------------------------------------------|------------------------------------------------------------------------------|---------------------------------|------------------------------------------------------------------|--------------------------|--------------------------------------------------------------------------------------------------------------------------------------------------------------------------------------------------------------------------------------------------------------------------------------------------------------------------------------------------------------------------------------------------------------------------------------------------------------------------------------------------------------------------------------------------------------------------------------------------------------|----------------------------------------------------------------------------------------------------------------------------------------------------------------------------------------------------------------------------------------------------|--------------------------------------------------------------------------------------------------------------------------------------------------------------------------------------------------------------------------------------------------------------------------------------------------------------------------------------------------------------------------------------------------------------------------------------------------------------------------------------------------------------------------------------------------------------------------------------------------------------------------------------------------------------------------------------------------------------------------------------------------------------------------------------------------------------------------------------------------------------------------------------------------------------------------------------------------------------------------------------|
| 2017 [91]<br>India                                      | and safety of common steroid sparing agents in idiopathic nephrotic syndrome | e cohort study<br>Single center | Syndrome<br>Mycophenolat<br>e mofetil<br>Levamisol<br>Tacrolimus | al34<br>0,<br>LEV<br>129 | <b>Age at NS onset:</b> 76.8 ± 32.0 mths<br><b>Age at LEV:</b> not stated<br><b>Duration of NS:</b> 3.3 ± 2.1 yrs<br><b>FRNS/SDNS:</b> 78/51<br><br><b>MMF:</b> n=130<br><b>Age at NS onset:</b> 85.2 ± 28.8 mths<br><b>Duration of NS:</b> 3.4 ± 2.6 yrs<br><b>FRNS/SDNS:</b> 74/56<br><br><b>TAC:</b> n=81<br><b>Age at NS onset:</b> 79.2 ± 26.2 mths<br><b>Duration of NS:</b> 3.1 ± 1.6 yrs<br><b>FRNS/SDNS:</b> 47/34<br><br><b>FU:</b> at least 30 mths<br>210M, 130F<br><b>Indications:</b> SDNS (preferred MMF or TAC), FRNS (preferred LEV or MMF), no previous exposure to steroid-sparing agents | alternate days<br>Or<br>MMF: 1200 mg/m <sup>2</sup> daily<br>Or<br>Tacrolimus 0.1-0.2 mg/kg/d<br><br><b>Duration:</b> steroid-sparing agent continued for 1 yr following complete stop of steroids<br><b>Other:</b> oral steroids in tapering dose | <b>mths from previous year:</b><br>LEV: -3.1 ± 1.1<br>MMF: -4.5 ± 1.3<br>TAC: -5.1 ± 1.3<br>All p<0.001 relative to pre-study period.<br><br><b>RR at 12 mths and 24 mths (after stop of agent)</b><br>LEV: 1.7/yr; 2.8/yr<br>MMF: 0.9/yr; 1.4/yr<br>TAC: 0.9/yr; 1.8/yr<br><br><b>Relapse-free survival at 30 mths:</b><br><b>TAC vs. MMF:</b> 61.7 vs. 38.5%, p<0.001<br><b>TAC vs. LEV:</b> 61.7% vs. 24%, p<0.0001<br><b>Time to relapse:</b><br>LEV: 21 days<br>MMF: 23 days<br>TAC: 26 days<br><br><b>Cumulative predn. dose at 12 mths:</b><br><b>TAC vs MMF and LEV:</b> 82.7 ± 26.4 mg/kg/yr vs. 136.8±65.4 mg/kg/yr and 108.8 ± 35.7 mg/kg/yr (p<0.001)<br><b>Cum. pred. dose between 18-30 mths:</b><br><b>MMF vs. TAC and LEV:</b> 74.4 mg/kg/yr vs. 96.4 mg/kg/yr (p=0.004); 74.4 vs. 117.6 mg/kg/yr (p<0.001).<br><b>Predictors for relapse:</b><br>SDNS vs. FRNS: HR 2.14 (95% CI 1.79-2.96, p<0.001)<br><b>AE:</b><br>LEV (n=3): malaria 1, transient mood changes 2 |

| 1 <sup>st</sup> author, year, [Ref.], country of origin | Title of Publication                                                                                                                                                | Study design                                | Keywords                                                                                               | N  | Population characteristics                                                                                                                                                                                                                                                          | Treatment                                                                                                                                                                                                                                                                                                                                                                                                                                                                   | Outcomes                                                                                                                                                                                                                                                                                                                                                                                                                                                                                                                                                                                         |
|---------------------------------------------------------|---------------------------------------------------------------------------------------------------------------------------------------------------------------------|---------------------------------------------|--------------------------------------------------------------------------------------------------------|----|-------------------------------------------------------------------------------------------------------------------------------------------------------------------------------------------------------------------------------------------------------------------------------------|-----------------------------------------------------------------------------------------------------------------------------------------------------------------------------------------------------------------------------------------------------------------------------------------------------------------------------------------------------------------------------------------------------------------------------------------------------------------------------|--------------------------------------------------------------------------------------------------------------------------------------------------------------------------------------------------------------------------------------------------------------------------------------------------------------------------------------------------------------------------------------------------------------------------------------------------------------------------------------------------------------------------------------------------------------------------------------------------|
| <b>CPA – CSA – MMF – LEV – AZA</b>                      |                                                                                                                                                                     |                                             |                                                                                                        |    |                                                                                                                                                                                                                                                                                     |                                                                                                                                                                                                                                                                                                                                                                                                                                                                             |                                                                                                                                                                                                                                                                                                                                                                                                                                                                                                                                                                                                  |
| Moustafa BH 2016 [101] Egypt                            | Immunosuppressive therapy in children with steroid-resistant, frequently-relapsing, and steroid-dependent idiopathic nephrotic syndrome: a single center experience | Retrospective chart review<br>Single center | Childhood Nephrotic Syndrome<br>Steroid Resistance<br>Steroid Dependence<br>Relapse immunosuppressants | 79 | <p><b>CPA:</b> n=28<br/><b>CSA:</b> n=6<br/><b>MMF:</b> n=2<br/><b>LEV:</b> n=40<br/><b>AZA:</b> n=10</p> <p><b>Age at NS onset:</b> 3.7 (1.3-10.5) yrs<br/><b>Age at medication:</b> not stated<br/><b>FU:</b> 44 M, 35 F<br/><b>Indications:</b> SDNS/ FRNS, steroid toxicity</p> | <p><b>CPA:</b> 2-3 mg/kg/d orally for 8-12 wks or IV as monthly bolus of 500-750 mg/m<sup>2</sup> for 6 mths<br/><b>CSA:</b> 4-6 mg/kg/d divided into 2 doses for at least 12 mths<br/><b>MMF:</b> 1200 mg/m<sup>2</sup>/day divided into doses<br/><b>LEV:</b> 2-2.5 mg/kg/dose twice weekly for 6-24 mths<br/><b>AZA:</b> 2 mg/kg/d for 8 wks.</p> <p>Either given as 1<sup>st</sup> or 2<sup>nd</sup> line drug; some given in double- or triple-combination therapy</p> | <p><b>Remission for 6 mths:</b><br/><b>CPA:</b> 24/28 (85.7%)<br/><b>CSA:</b> 5/6 (83.3%)<br/><b>MMF:</b> 1/2 (50%)<br/><b>LEV:</b> 22/40 (55%)<br/><b>AZA:</b> 8/10 (80%)</p> <p><b>AE</b> (not differentiated between SDNS (n=79) and SRNS (n=51)):<br/>CPA: Leukopenia 15/63 (23.8%), hemorrhagic cystitis 2/63 (3.2%)<br/>CSA: gym hyperplasia 8/31 (25.8%), hirsutism 7/31 (22.6%), nephrotoxicity 2/31 (6.4%), hypertension 2/31 (6.4%)<br/>MMF: diarrhea 7/12 (58.4%), nausea 3/12 (25%), abdominal pain 1 (8.3%), cough 1/12 (8.3%)<br/>LEV: none<br/>AZA: Leukopenia 2/10, diarrhea</p> |
|                                                         |                                                                                                                                                                     |                                             |                                                                                                        |    |                                                                                                                                                                                                                                                                                     |                                                                                                                                                                                                                                                                                                                                                                                                                                                                             | <p>MMF (n=15): minor, temporary reduction of dose 3, acute resp. infec. 3, UTI 1, acute hepatitis 1, abdominal chronic pain 2, rec. vomiting 1, raised liver enzymes 1, muscle pain 1<br/>TAC (n=33): temporary drug discontinuation 8, complete drug stop: 1<br/>SAE: gram-pos. pneumonia with admission 2, gram-neg. peritonitis 1, pancreatitis 1<br/>Minor: 5 acute resp. inf., gastroenteritis 4, UTI 2, herpes simplex 1, abscess 2, stomatitis 2, convulsion 1, alopecia 2, hirsutism 1, eczema 2, hyperglycemia 3, leukopenia 2</p>                                                      |

| 1 <sup>st</sup> author, year, [Ref.], country of origin | Title of Publication                                                                                               | Study design               | Keywords                                                                                                                                    | N   | Population characteristics                                                                                                                                                                                                                                                                                                                              | Treatment                                                                                                                                                                                                                                                                                                                 | Outcomes                                                                                                                                                                                                                                                                                                                                                                                                                                                                                                                                                                                  |
|---------------------------------------------------------|--------------------------------------------------------------------------------------------------------------------|----------------------------|---------------------------------------------------------------------------------------------------------------------------------------------|-----|---------------------------------------------------------------------------------------------------------------------------------------------------------------------------------------------------------------------------------------------------------------------------------------------------------------------------------------------------------|---------------------------------------------------------------------------------------------------------------------------------------------------------------------------------------------------------------------------------------------------------------------------------------------------------------------------|-------------------------------------------------------------------------------------------------------------------------------------------------------------------------------------------------------------------------------------------------------------------------------------------------------------------------------------------------------------------------------------------------------------------------------------------------------------------------------------------------------------------------------------------------------------------------------------------|
| <b>CsA/Tac – CPA – LEV - MMF</b>                        |                                                                                                                    |                            |                                                                                                                                             |     |                                                                                                                                                                                                                                                                                                                                                         |                                                                                                                                                                                                                                                                                                                           |                                                                                                                                                                                                                                                                                                                                                                                                                                                                                                                                                                                           |
| Moorani 2019 [92]<br>Pakistan                           | Immunosuppressive therapy in children with primary nephrotic syndrome: single center experience, Karachi, Pakistan | Retrospective chart review | Nephrotic syndrome<br>Minimal change disease<br>Oral prednisolone<br>Levamisole<br>Cyclophosphamide<br>Cyclosporin<br>Mycophenolate mofetil | 130 | <p><b>CPA:</b> n=90<br/> <b>CsA:</b> n=88<br/> <b>LEV:</b> n=55<br/> <b>MMF:</b> n=39<br/> <b>CsA+MMF:</b> n=20<br/> <b>TAC+/-MMF:</b> n=11</p> <p><b>Age at NS onset:</b> 4.78 ± 3.23 yrs<br/> <b>Age at medication:</b> not stated<br/> <b>FU:</b> not stated, at least 6 mths<br/> <b>Indication:</b> SDNS (n=55), FRNS (n=75), steroid toxicity</p> | <p><b>Sequential use:</b><br/> <b>CPA:</b> 2-3 mg/kg/d for 8-12 wks (2<sup>nd</sup> line)<br/> <b>CNI:</b> (3<sup>rd</sup> line), dose not stated<br/> <b>LEV:</b> 2-2.5 mg/kg on a.d. for 6-24 mths (1<sup>st</sup> line)<br/> <b>MMF:</b> (3<sup>rd</sup> line); dose not stated</p> <p><b>Other:</b> oral steroids</p> | <p><b>Remission (complete; partial) at 6 mths:</b><br/> CPA: 45/90; 13/90<br/> CsA: 30/88; 18/88<br/> LEV: effective 44/55<br/> MMF: 4/39; 16/39<br/> CsA+MMF: 4/20; 7/20, CsA dependent 9/20</p> <p><b>Outcome last FU:</b><br/> Compl. Rem. Off treatment: 65/130<br/> Compl. Rem. ON treatment: 34/130<br/> Partial rem. ON treatment: 12/130</p> <p><b>AE:</b><br/> CPA: severe infection (disseminated chicken pox 9, BMS 5, alopecia 3)<br/> CsA: gum hyperplasia 5, hypertrichosis 6, renal dysfunction 7, deafness 1<br/> LEV: pancytopenia 1, allergic rash 1<br/> MMF: none</p> |
|                                                         |                                                                                                                    |                            |                                                                                                                                             |     |                                                                                                                                                                                                                                                                                                                                                         | Other: oral steroids                                                                                                                                                                                                                                                                                                      | 2/10, abdominal pain 2/10, arthralgia 1/10                                                                                                                                                                                                                                                                                                                                                                                                                                                                                                                                                |

**Table S8.5: Rituximab (RTX)**

| 1 <sup>st</sup> author, year, [Ref.], country of origin | Title of Publication                                                                                                               | Study design                                          | Keywords                                                                                                       | N              | Population characteristics                                                                                                                                                                                          | Treatment                                                                                                                                                                         | Outcomes                                                                                                                                                                                                                                                                                                                                                                                                                                                                                                                                                                  |
|---------------------------------------------------------|------------------------------------------------------------------------------------------------------------------------------------|-------------------------------------------------------|----------------------------------------------------------------------------------------------------------------|----------------|---------------------------------------------------------------------------------------------------------------------------------------------------------------------------------------------------------------------|-----------------------------------------------------------------------------------------------------------------------------------------------------------------------------------|---------------------------------------------------------------------------------------------------------------------------------------------------------------------------------------------------------------------------------------------------------------------------------------------------------------------------------------------------------------------------------------------------------------------------------------------------------------------------------------------------------------------------------------------------------------------------|
| <b>RTUXIMAB (RTX)</b>                                   |                                                                                                                                    |                                                       |                                                                                                                |                |                                                                                                                                                                                                                     |                                                                                                                                                                                   |                                                                                                                                                                                                                                                                                                                                                                                                                                                                                                                                                                           |
| Kamei 2009 [130] Japan                                  | Single dose of rituximab for refractory steroid-dependent nephrotic syndrome in children                                           | Multicenter prospective trial                         | Refractory steroid-dependent nephrotic syndrome<br>Children<br>Clinical trial<br>Rituximab<br>Pharmacokinetics | 12             | <b>Age at NS onset:</b> 5.8 ± 4.3 yrs<br><b>Age at RTX:</b> 12.7 ± 3.9 yrs;<br>8M, 4F<br><b>FU:</b> not stated, at least until 6 months after RTX<br><b>Indications:</b> refractory SDNS, steroid toxicity          | <b>RTX:</b> single dose of 375 mg/m <sup>2</sup><br><b>Duration:</b><br><b>Other:</b> tapering dose of steroids, CNI 9, Mizoribine 5, MMF 3                                       | <b>Remission:</b> 3/12 at 12 months<br><b>RR:</b> 2.83 ± 1.19 fell to 1.08 ± 1.08 at 6 months after RTX<br><b>Time to Relapses:</b> 9/12 at 129 (8-353) days after RTX;<br><b>Pred. dose:</b> stopping pred. at 74 (IQR, 55-172) days after RTX;<br>12/12; Steroid-free period reduced from 7.0 ± 13.5 to 68.0 ± 30.7 days at 6 months after RTX<br><b>Withdrawal of other IS:</b> 8/12 pts.<br><b>B-cell depletion:</b> complete 10/12 pts. After single dose<br><b>B-Cell recovery:</b> after 146.5 (IQR, 84-245) days<br><b>AE:</b> mild infusion reactions 5/12 (42%) |
| Gulati 2010 [131] India, USA                            | Efficacy and Safety of Treatment with RTX for difficult Steroid-resistant and –dependent nephrotic syndrome: A multicentric report | Retrospective cohort study/ chart review<br>3 centers | SRNS<br>SDNS<br>Rituximab<br>children                                                                          | 24<br>SDN<br>S | <b>Age at NS onset:</b> 2.8 ± 0.9 yrs<br><b>Age at RTX:</b> 11.7 ± 2.9 yrs<br><b>FU:</b> 16.8 ± 5.9 months; 19M, 5F<br><b>Indication:</b> SDNS; non-responsive to CPH, CNI, levamisole, MMF; SDNS with CNI toxicity | <b>RTX:</b> 375 mg/m <sup>2</sup> once every week, 2 doses<br><b>Duration:</b> 2 weeks<br><b>Other:</b> tapering dose of steroids, enalapril (SDNS with hypertension), furosemide | <b>Remission:</b> 20 (83.3%) at 12 months<br><b>RR:</b> 4.0 ± 0.4 fell to 0.2 ± 0.3 episodes/pt. per year at 12 months after RTX<br><b>Time to relapse:</b> 11.2 ± 2.7 months<br><b>Pred. dose:</b> tapered to 0.3 to 0.5 mg/kg every other day; 8 pts.<br><b>Withdrawal of other IS:</b> 1 or more in 12 pts.<br><b>B-cell depletion:</b> CD19 counts: 12.6 ± 3.4% at baseline, 0.2 ± 0.1 % after 2 doses<br><b>AE:</b> Mild infusion reactions: 3/24                                                                                                                    |
| Prytula 2010 [132] International (IPNA)                 | Rituximab in refractory nephrotic syndrome                                                                                         | Retrospective multicenter chart reviews               | Pediatric<br>NS<br>Remission<br>Renal                                                                          | 28             | <b>Age at NS onset:</b> 4 yrs (range 18 mths to 17 yrs)<br><b>Age at RTX:</b> not stated<br><b>FU:</b> n.a.; 25M, 3F                                                                                                | <b>RTX:</b> 4 doses of 375 mg/m <sup>2</sup> weekly or 2 doses of 750 mg/m <sup>2</sup> every 14 days<br><b>Duration:</b> 4 weeks                                                 | <b>Remission:</b> ongoing 10/28 for 4.5 (IQR, 1-10) mths at end of study<br><b>Time to relapse:</b> 13/28 after 6 (IQR, 1-16) months                                                                                                                                                                                                                                                                                                                                                                                                                                      |

| 1 <sup>st</sup> author, year, [Ref.], country of origin | Title of Publication                                                                    | Study design                            | Keywords                                                                                                     | N  | Population characteristics                                                                                                                                                                                                                                                                                                                                                                                                                                         | Treatment                                                                                                                                                                                                                          | Outcomes                                                                                                                                                                                                                                                                                                                                                                                                                                                                                                                                                                                                                               |
|---------------------------------------------------------|-----------------------------------------------------------------------------------------|-----------------------------------------|--------------------------------------------------------------------------------------------------------------|----|--------------------------------------------------------------------------------------------------------------------------------------------------------------------------------------------------------------------------------------------------------------------------------------------------------------------------------------------------------------------------------------------------------------------------------------------------------------------|------------------------------------------------------------------------------------------------------------------------------------------------------------------------------------------------------------------------------------|----------------------------------------------------------------------------------------------------------------------------------------------------------------------------------------------------------------------------------------------------------------------------------------------------------------------------------------------------------------------------------------------------------------------------------------------------------------------------------------------------------------------------------------------------------------------------------------------------------------------------------------|
| Seller-Leclerc 2010 [133]<br>France                     | Rituximab efficiency in children with steroid-dependent nephrotic syndrome              | Retrospective single center case series | Rituximab idiopathic nephrotic syndrome CD19 B cell depletion Steroid dependency Immunosuppressive treatment | 22 | <b>Indications:</b> refractory SDNS, FRNS<br><b>Age at NS onset:</b> 2.96 ± 0.49 yrs (range 0.7 to 12.6 yrs)<br><b>Age at RTX:</b> 13.5 ± 0.68 yrs<br><b>Duration of NS at RTX:</b> 10.6 ± 0.78 yrs (range 2.6 to 17.5 yrs)<br><b>FU:</b> n.a., at least 12 months after RTX<br><b>17M, 5F</b><br><b>Indications:</b> SDNS despite CNI (22 pts), LEV (7 pts.), CPH (15 pts.); disease duration > 8 yrs (18), steroid and/or CNI toxicity (13), non-compliance (12) | <b>RTX:</b> 1-4 doses of 375 mg/m <sup>2</sup> weekly (4x: 15 pts.; 3x: 2, 2x: 4; 1x: 1), subsequent infusions were given<br><b>Duration:</b> 1-4 weeks<br><b>Other:</b> tapering dose of steroids: all, CNI+MMF 17, CNI 3, MMF 2, | <b>B-cell depletion:</b> 19/21 with < 1% of lymphocyte count<br><b>AE:</b> Acute infusion reactions 8, infection 1, hypogammaglobulinemia 1<br><b>Remission:</b> 9/22 at 12 months<br><b>RR:</b> n.a.<br><b>Time to relapse:</b> n.a.<br><b>Withdrawal Pred. and IS:</b> 15/22 at 12 months<br><b>B-cell depletion:</b> after 1 <sup>st</sup> infusion: all<br><b>Duration of B-cell depletion:</b> 7.1 ± 1.0 mths (1-2 doses) and 8.2 ± 0.7 mths (3-4 doses of RTX)<br><b>AE:</b> infusion reaction 2, severe neutropenia 1, thrombosis peripheral veine 1, transient hepatic cytolysis 1, transient thrombocytopenia 1, Infections 2 |
| Kemper 2012 [134]<br>Germany, Austria (GPN)             | Long-term follow-up after rituximab for steroid-dependent idiopathic nephrotic syndrome | Retrospective multicenter analyses      | Nephrotic syndrome Rituximab Steroid sensitive                                                               | 37 | <b>Age at NS onset:</b> 2.9 (IQR, 1.3-12.5) yrs<br><b>Age at RTX:</b> 13.4 (IQR, 6.4-18) yrs<br><b>FU:</b> 29.4 (IQR, 9.2-92.8) mths after RTX; 25M, 12F<br><b>Long-term FU:</b> 36 (IQR, 24-92.8) mths for 29/37 pts.<br><b>Indications:</b> refractory SDNS despite LEV (8), CPH (25), CSA (34), MMF (26)                                                                                                                                                        | <b>RTX:</b> 1-4 doses of 375 mg/m <sup>2</sup> /week (4x: 9; 3x: 1; 2x: 6; 1x: 21), subsequently repeated infusions<br><b>Duration:</b> 1-4 weeks<br><b>Other:</b> steroids in tapering dose, CNI, MMF                             | <b>Remission:</b> 26/37 (70.3%) at 12 months; 12/29 (41.4%) at 24 months<br><b>Relapses:</b> 24/37 (64.8%) after initial RTX course<br><b>Time to relapse:</b> 10.3 ± 3.5 mths (1-2 doses) and 23.3 ± 18.7 mths (3-4 doses) (p<0.05)<br><b>Pred. dose:</b> discontinued in 35/37 (94.5%) after 1.3 (0.37-6) mths<br><b>Withdrawal of IS:</b> 22/37 (59%)<br><b>Time to relapse:</b> 9.6 (IQR, 5.2-64.1) months<br><b>B-cell depletion:</b> n.a.<br><b>AE:</b> mild infusion reaction 2                                                                                                                                                 |
| Teller 2013 [135]                                       | Long-term outcome of                                                                    | Retrospective multicenter               | Anti-CD20 monoclonal                                                                                         | 18 | <b>Age at NS onset:</b> 2.8 (IQR, 1.6-7.4) yrs                                                                                                                                                                                                                                                                                                                                                                                                                     | <b>RTX:</b> 1-4 doses 375 mg/m <sup>2</sup> /week (4x: 10, 3x: 1,                                                                                                                                                                  | <b>Remission:</b> 8/18 at 24 months, <b>Duration of remission:</b>                                                                                                                                                                                                                                                                                                                                                                                                                                                                                                                                                                     |

| 1 <sup>st</sup> author, year, [Ref.], country of origin | Title of Publication                                                               | Study design                               | Keywords                                                                                    | N                       | Population characteristics                                                                                                                                                                                                                                                                                 | Treatment                                                                                                                                                                                                                                                                | Outcomes                                                                                                                                                                                                                                                                                                                                                                                                                                                                                                                                                                                                                                             |
|---------------------------------------------------------|------------------------------------------------------------------------------------|--------------------------------------------|---------------------------------------------------------------------------------------------|-------------------------|------------------------------------------------------------------------------------------------------------------------------------------------------------------------------------------------------------------------------------------------------------------------------------------------------------|--------------------------------------------------------------------------------------------------------------------------------------------------------------------------------------------------------------------------------------------------------------------------|------------------------------------------------------------------------------------------------------------------------------------------------------------------------------------------------------------------------------------------------------------------------------------------------------------------------------------------------------------------------------------------------------------------------------------------------------------------------------------------------------------------------------------------------------------------------------------------------------------------------------------------------------|
| France                                                  | children treated with rituximab for idiopathic nephrotic syndrome                  | study                                      | antibody dependent idiopathic syndrome<br>Efficacy<br>Side effects<br>Follow-up<br>Children |                         | <b>Age at RTX:</b> 13.5 (IQR, 5.9-18) yrs<br><b>Duration of NS until RTX:</b> 10.4 (IQR, 3.5-16) yrs<br><b>FU:</b> 3.2 (IQR, 2-5.3) yrs, at least 24 mths after 1 <sup>st</sup> RTX infusion;<br><b>Indications:</b> SDNS, frequent relapses despite CNI, MMF, steroid and/or CNI toxicity, non-compliance | 2x: 4; 1x: 3), subsequent doses given due to CD-10 cell recovery (54%) or relapse (41%), systematically (5%)<br><b>Duration:</b> 1-4 weeks<br><b>Other:</b> steroids in tapering dose: all, CNI+MMF (13), CNI (5)                                                        | depending on re-treatment with RTX; no: 19 months, 1: 17 mths; 2: 30 mths; 3: 23.5 mths; 6: 32 mths<br><b>Relapses:</b> 10/18 at 24 mths<br><b>Time to relapse:</b> 1.3 (IQR, 5-22) months after first RTX in 10/18 pts: and with CD19 count of 14 (IQR, 4-59)%<br><b>Withdrawal of Pred. and IS</b> at 24 mths: completely stopped (4), decrease of doses in all pts.: prednisone by 72% (29.8 vs. 8.5 mg/m <sup>2</sup> /day), CNI by 63% (CsA 4.85 vs. 1.78 mg/kg/day), MMF by 20% (1306 vs. 1046 mg/m <sup>2</sup> /day)<br><b>B-cell depletion:</b> all<br><b>AE:</b> infections 4, neutropenia 1, flare of psoriasis 1, behavioral disorders 1 |
| Ruggenenti 2014 [136] Italy                             | Rituximab in steroid-dependent or frequent relapsing idiopathic nephrotic syndrome | Prospective multicenter study<br>5 centers |                                                                                             | 10 children (20 adults) | <b>Age at NS onset:</b> 3.1 (IQR, 2.2-5.7) yrs<br><b>Age at RTX:</b> 11.7 (IQR, 9.5-13.6) yrs<br><b>FU:</b> at least 12 mths after RTX<br>5M, 5F<br><b>Indications:</b> SDNS, relapses despite CNI (9), MMF (7), Azathioprine (3), CPH (4); steroid toxicity                                               | <b>RTX:</b> 1-2 doses of 375 mg/m <sup>2</sup> /week (based on B-cell depletion after 1 week); no repeated infusions within 12 mths<br><b>Duration:</b> 1-2 weeks<br><b>Other:</b> steroids in tapering doses, CNI, CPH, diuretics, antihypertensives (incl. ACE-I, ARB) | <b>Remission:</b> 3/10 at 12 mths<br><b>Relapses:</b> 7/10 (70%) at 12 mths<br><b>RR:</b> All: decreased from 2.5 (IQR, 2-4) to 0.5 (IQR, 0-1) after RTX<br><b>Time to relapse:</b><br><b>Pred. dose:</b> decreased from 0.27 mg/kg (IQR, 0.19-0.6) to 0 mg/kg (IQR, 0-0.23) (p<0.001) at 12 mths<br><b>Other IS:</b> Decreasing cumulative yearly doses: CsA and MMF<br><b>B-cell depletion:</b> completely after 1-2 doses; recovery from mth 6 to 1 yr.<br><b>AE:</b> none                                                                                                                                                                        |
| Sun 2014 [137] China                                    | Efficacy of rituximab therapy in children with refractory                          | Prospective single center study            | Refractory nephrotic syndrome, rituximab                                                    | 12, of those 9 SDN      | <b>Age at NS onset:</b> 1.6-8.9 yrs<br><b>Age at RTX:</b> not stated<br><b>FU:</b> 4-16 mths (average: 8                                                                                                                                                                                                   | <b>RTX:</b> 1-2 doses of 375 mg/m <sup>2</sup> /week (max. 500 mg) (2x 3; 1x 6 pts.)<br><b>Duration:</b> 1-2 weeks                                                                                                                                                       | <b>Remission:</b> 8/10 at 6 mths<br><b>RR:</b> decreased from 1.45 ± 0.52 to 0.18 ± 0.40 during 6 mths after RTX                                                                                                                                                                                                                                                                                                                                                                                                                                                                                                                                     |

| 1 <sup>st</sup> author, year, [Ref.], country of origin | Title of Publication                                              | Study design                | Keywords                                                            | N  | Population characteristics                                                                                                                                                                                                                                                                                                                                                                                                                                                                                                                                                                      | Treatment                                                                                                                                                                                                                                                                                                                                                                                                        | Outcomes                                                                                                                                                                                                                                                                                                                                                                                                                                                                                                                                                                                                                                                                                                                                                                                                                               |
|---------------------------------------------------------|-------------------------------------------------------------------|-----------------------------|---------------------------------------------------------------------|----|-------------------------------------------------------------------------------------------------------------------------------------------------------------------------------------------------------------------------------------------------------------------------------------------------------------------------------------------------------------------------------------------------------------------------------------------------------------------------------------------------------------------------------------------------------------------------------------------------|------------------------------------------------------------------------------------------------------------------------------------------------------------------------------------------------------------------------------------------------------------------------------------------------------------------------------------------------------------------------------------------------------------------|----------------------------------------------------------------------------------------------------------------------------------------------------------------------------------------------------------------------------------------------------------------------------------------------------------------------------------------------------------------------------------------------------------------------------------------------------------------------------------------------------------------------------------------------------------------------------------------------------------------------------------------------------------------------------------------------------------------------------------------------------------------------------------------------------------------------------------------|
| Kamei K 2016 [138] Japan                                | nephrotic syndrome: a prospective observational study in Shanghai | Retrospective Single center | Rituximab Steroid-dependent nephrotic syndrome SRNS B-cell Children | 81 | <p>± 4 mths) after RTX</p> <p><b>Indications:</b> SDNS/FRNS despite CPH, CNI, MMF</p> <p><b>Age at NS onset:</b> 4.2 (IQR 1.2-17.3) yrs; 5.9 ± 4.3 yrs</p> <p><b>Age at RTX:</b> 11.4 (3.1-21.8) yrs, 11.3 ± 4.9 yrs</p> <p><b>Duration of disease before RTX:</b> 4.0 (0.6-19.4) yrs, 5.4 ± 4.2 yrs</p> <p><b>FU:</b> at least 12 months after RTX; 38 (13-90) mths 57M, 24F</p> <p><b>Indications:</b> refractory SDNS (steroid dependence under IS), history of SRNS and later acquired steroid sensitivity and SDNS (n=39 (48%), primary n=16, secondary n=23), severe steroid toxicity</p> | <p><b>RTX:</b> single dose of 375 mg/m<sup>2</sup>, additional doses administered in case of relapses after B-cell recovery in 51 pts. (63%), 7 (9%) more than 5 additional doses</p> <p><b>Other:</b> oral steroids, continuing IS, IS at initial RTX:<br/>Predn. 81 (100%)<br/>Csa 67 (82.7%)<br/>Mizoribine 51 (63%)<br/>MMF 12 (14.8%)<br/>Tacrolimus 4 (4.9%)<br/>CPH/Chlorambucil/<br/>Azathioprine: 0</p> | <p><b>50%-relapse free survival:</b> 482 days</p> <p><b>Relapses:</b> 59 (73%) at 309 (0-1201) days after initial RTX</p> <p>59 (73%) had 1-16 relapses during observation period (total: 260)</p> <p>7 (9%) had relapses during B-cell depletion</p> <p>8 (10%) had relapses with steroid resistance</p> <p><b>Relapse rate:</b><br/>Before RTX: 4.5 ± 1.9/yr<br/>At 1yr after RTX: 0.9 ± 1.4/yr<br/>At 2 yrs: 1.0 ± 1.4/yr</p> <p><b>Predn. Dose:</b><br/>Discontinuation possible in 69 (85%) without relapses at 66.5 (26-409) days</p> <p><b>IS:</b> all continued with IS, 44 started in MMF. 34 with MZR switched to MMF. No of pat. requiring decreased from 72 (89%) to 50 (62%) at 6 mths, and 43 (53% at 12 mths)</p> <p><b>B-cell depletion:</b> 78 of 81 after initial RTX</p> <p><b>Time to B-cell recovery:</b> 160</p> |



| 1 <sup>st</sup> author, year, [Ref.], country of origin | Title of Publication                                                                                                        | Study design                                 | Keywords                                                 | N             | Population characteristics                                                                                                                                                                                                                                                  | Treatment                                                                                                                                                                                                                                                                                                                                                                             | Outcomes                                                                                                                                                                                                                                                                                                                                                                                                                                                                                                                                                    |
|---------------------------------------------------------|-----------------------------------------------------------------------------------------------------------------------------|----------------------------------------------|----------------------------------------------------------|---------------|-----------------------------------------------------------------------------------------------------------------------------------------------------------------------------------------------------------------------------------------------------------------------------|---------------------------------------------------------------------------------------------------------------------------------------------------------------------------------------------------------------------------------------------------------------------------------------------------------------------------------------------------------------------------------------|-------------------------------------------------------------------------------------------------------------------------------------------------------------------------------------------------------------------------------------------------------------------------------------------------------------------------------------------------------------------------------------------------------------------------------------------------------------------------------------------------------------------------------------------------------------|
| Fujinaga 2017 [139]<br>Japan                            | Predictors of relapse and long-term outcome in children with steroid-dependent nephrotic syndrome after rituximab treatment | Retrospective chart review                   | Rituximab SDNS Relapse Long-term                         | 43            | <b>Age at NS onset:</b> 6.1 ± 3.6 yrs<br><b>Age at RTX:</b> 11.0 ± 4.8 yrs<br><b>FU:</b> 5.4 ± 1.6 yrs, at least > 2 yrs<br>29M, 14F<br><b>Indications:</b> complicated SDNS despite use of IS incl. CSA, MMF, CPH, Mizoribine (24 (56%) had history of steroid-resistance) | <b>RTX:</b> Single dose of RTX (375 mg/m <sup>2</sup> , max: 500 mg), additional doses administered in 28 (65%) pts. in case of relapse despite maintenance treatment (total 109 doses)<br><b>Other:</b> prednisolone (in tapering dose for 6 mths), CSA (21) or MMF (11) or CSA+MMF (7) or mizoribine (4) (maintenance at least for 12 mths predn.-free remission, then tapered off) | <b>Treatment-free remission &gt; 12 mths:</b> 5/43 (12%)<br><b>1<sup>st</sup> relapse after RTX:</b> 39 (91%) after 586 (IQR 2-1450) days<br><b>50% relapse-free survival:</b> 646 days<br><b>Withdrawal of steroids:</b> 39 (91%) at 154 days after initial RTX<br><b>B-cell depletion:</b> CD19 recovery at 150 (IQR 43-614) days;<br>Short B-cell depletion (<150 days) associated with high risk for 1 <sup>st</sup> relapse after RTX (HR 2.5 (95% CI 0.92-5.71)<br><b>AE:</b> neutropenia 3/43, 1of 3 required hospitalization due to acute infection |
| Topaloglu 2019 [140]<br>Turkey                          | Rituximab for children with difficult-to-treat nephrotic syndrome: Its effects on disease progression and growth            | Retrospective chart reviews<br>Single center | Rituximab Nephrotic syndrome Steroid Cyclosporine growth | 41 (21 SSNS ) | <b>Age at NS onset:</b> 5.8 ± 4.7 yrs<br><b>Age at RTX:</b> 10.8 ± 5.1 yrs<br><b>FU post-RTX:</b> 2.3 ± 1.6 yrs<br>10 M, 11 F<br><b>Indication:</b> SDNS (n=21) despite CNI, SRNS (n=20)                                                                                    | <b>Only SSNS group:</b><br><b>1<sup>st</sup> course of RTX:</b> 375 mg/m <sup>2</sup> in 2 doses: 4 3 doses: 10 4 doses: 7 additional doses as maintenance in 10 (47.6%) every 6-12 mths                                                                                                                                                                                              | <b>Only SSNS group:</b><br><b>No. of relapses:</b> fell from 4 per 2yrs to 0 per 2 yrs after RTX (p<0.001)<br><b>Relapses:</b> 8/21 (38%), independent from no. of initial RTX infusions<br><b>Time to relapse:</b> 14.6 ± 11.7 mths                                                                                                                                                                                                                                                                                                                        |

| 1 <sup>st</sup> author, year, [Ref.], country of origin | Title of Publication                                                                                                                 | Study design        | Keywords                                                         | N  | Population characteristics                                                                                                                                                                                                                                                                                                                                                            | Treatment                                                                                                                                                                                                                                                                                                                                                                                                                                                                                                                                                                                       | Outcomes                                                                                                                                                                                                                                                                                                                                                                                                                                                                                                                                                                                                                 |
|---------------------------------------------------------|--------------------------------------------------------------------------------------------------------------------------------------|---------------------|------------------------------------------------------------------|----|---------------------------------------------------------------------------------------------------------------------------------------------------------------------------------------------------------------------------------------------------------------------------------------------------------------------------------------------------------------------------------------|-------------------------------------------------------------------------------------------------------------------------------------------------------------------------------------------------------------------------------------------------------------------------------------------------------------------------------------------------------------------------------------------------------------------------------------------------------------------------------------------------------------------------------------------------------------------------------------------------|--------------------------------------------------------------------------------------------------------------------------------------------------------------------------------------------------------------------------------------------------------------------------------------------------------------------------------------------------------------------------------------------------------------------------------------------------------------------------------------------------------------------------------------------------------------------------------------------------------------------------|
| <b>Different RTX regimen/ dosing of RTX</b>             |                                                                                                                                      |                     |                                                                  |    |                                                                                                                                                                                                                                                                                                                                                                                       |                                                                                                                                                                                                                                                                                                                                                                                                                                                                                                                                                                                                 |                                                                                                                                                                                                                                                                                                                                                                                                                                                                                                                                                                                                                          |
| Hogan 2019 [141]<br>France                              | Effect of different rituximab regimens on B cell depletion and time to relapse in children with steroid-dependent nephrotic syndrome | Retrospective study | Idiopathic nephrotic syndrome<br>Children<br>B cell<br>Rituximab | 61 | 54/61 analysed (monthly B cell count required)<br><br>Group 1: n=8<br>Group 2: n=35<br>Group 3: n=18<br><br><b>Age at NS onset:</b> n.a.<br><br><b>Age at RTX:</b><br>Group 1: 7.6 (IQR 6.4-10.8) yrs, 5M, 3F<br>Group 2: 13.8 (9.8-15.3) yrs, 24M, 11F<br>Group 3: 10.1 (8.3-12.8) yrs, 8M, 10F<br><br><b>FU:</b> at least 12 mths after RTX<br><br><b>Indications:</b> SDNS despite | <b>RTX:</b><br><b>Group 1:</b> 1 dose of 100 mg/m <sup>2</sup><br><b>Group 2:</b> 1 dose of 375 mg/m <sup>2</sup><br><b>Group 3:</b> 2 doses of 375 mg/m <sup>2</sup><br><br><b>Duration:</b> see above<br><br><b>Other:</b> steroids in tapering dose, MMF, CN1                                                                                                                                                                                                                                                                                                                                | <b>Relapse-free survival at 1yr:</b><br>Total cohort: 60% (48-72), associated with time to B-cell reconstitution: HFR of relapse 0.78 (0.63-0.97) per month of B cell depletion)<br>Group 1: 50% (58-77)<br>Group 2: 59% (42-76)<br>Group 3: 72% (46-87)<br><b>B-cell depletion:</b> complete after initial RTX, otherwise pat. excluded<br><b>Time to B-cell reconstitution:</b><br>Group 1: 2.5 (IQR 1.8-3.5) mths<br>Group 2: 5.0 (3.9-6.0) mths<br>Group 3: 6.6 (4.6-7.8) mths<br><b>Factors associated with time to B-cell recovery:</b><br>Age at RTX: HR per year 0.87 (0.80-0.95)<br>RTX regimen (ref. group 3): |
|                                                         |                                                                                                                                      |                     |                                                                  |    |                                                                                                                                                                                                                                                                                                                                                                                       | <b>Other:</b> after RTX maintenance IS with CN1 10/21, MMF 2/21<br><br><b>Cumulative steroid dose:</b> fell from 117.8 mg/kg (75.6-152) (12 mths before RTX) to 34 mg/kg (20-48) (12 mths after RTX)<br><b>Cumulative CSA dose:</b> fell from 811.5 mg/kg (594.8-937.5) to 583.5 mg/kg (305.8-903) (p=0.015)<br><b>Median height z-score:</b> improved after RTX in 11/21 (52.3) from -1.2 (-2.5;-0.3) to -0.6 (-1.9; -0.1) (p=0.044)<br><b>Median BMI z-score:</b> decreased after RTX in 15/21 (71.4%) from 1.6 (0.9-3.0) to 1.1 (-0.7; 2.5) (p=0.007)<br><b>AE:</b> mild infusion reaction 1 |                                                                                                                                                                                                                                                                                                                                                                                                                                                                                                                                                                                                                          |

| 1 <sup>st</sup> author, year, [Ref.], country of origin | Title of Publication                                                                                                                   | Study design                                                    | Keywords                                                                                       | N  | Population characteristics                                                                                                                                                                                                                                                                                                                                                                                                                                                                                                                                                                                                | Treatment                                                                                                                                                                                                                                                                                                                                                                                                                                                      | Outcomes                                                                                                                                                                                                                                                                                                                                                                                                                                                                                                                                                                                                                                                                                      |
|---------------------------------------------------------|----------------------------------------------------------------------------------------------------------------------------------------|-----------------------------------------------------------------|------------------------------------------------------------------------------------------------|----|---------------------------------------------------------------------------------------------------------------------------------------------------------------------------------------------------------------------------------------------------------------------------------------------------------------------------------------------------------------------------------------------------------------------------------------------------------------------------------------------------------------------------------------------------------------------------------------------------------------------------|----------------------------------------------------------------------------------------------------------------------------------------------------------------------------------------------------------------------------------------------------------------------------------------------------------------------------------------------------------------------------------------------------------------------------------------------------------------|-----------------------------------------------------------------------------------------------------------------------------------------------------------------------------------------------------------------------------------------------------------------------------------------------------------------------------------------------------------------------------------------------------------------------------------------------------------------------------------------------------------------------------------------------------------------------------------------------------------------------------------------------------------------------------------------------|
| Maxted 2019 [142] UK                                    | Low-dose rituximab is no less effective for nephrotic syndrome measured by 12-month outcome                                            | Multicenter retrospective observational 1 cohort study 3 center | Rituximab Nephrotic syndrome Dosing                                                            | 60 | <p>prior treatments (Methylpredn. Pulses 21%, MMF 62%, CPA 20%, CNI 62%)</p> <p><b>RTX (1<sup>st</sup> course):</b><br/> <b>Low dose:</b> n=40<br/> <b>Intermediate dose:</b> n=5<br/> <b>High dose:</b> n=14</p> <p>Total of 143 RTX courses:<br/> 1 course: n=19<br/> 2 courses n=17<br/> 3 courses: n=11<br/> 4 courses: n=5<br/> 5 courses: n=8</p> <p><b>Age at NS onset:</b> 4 (IQR 1-14) yrs<br/> <b>Age at RTX:</b> 11 (4-17) yrs<br/> <b>FU:</b> 6-24 mths after 1<sup>st</sup> RTX course<br/> 38M, 22F<br/> <b>Indications:</b> SDNS, FRNS – received at least one dose of RTX, additional IS administered</p> | <p><b>RTX:</b><br/> <b>Low dose:</b> 375 mg/m<sup>2</sup>, given once<br/> <b>Intermediate dose:</b> all other regimens<br/> <b>High dose:</b> total of 1.5 g/m<sup>2</sup> (750 mg/m<sup>2</sup> in 2 doses or 375 mg/m<sup>2</sup> in 4 doses) given in 4-week period<br/> 26 received subsequent doses prophylactically at 179 (51-540) days)</p> <p><b>Duration:</b> 4-week period<br/> <b>Other:</b> prednisolone in tapering dose, CNI, MMF, CNI+MMF</p> | <p><b>Relapse-free survival:</b><br/> 6 mths: Low 30/37 (81%), Intern. 5/5 (100%), High 12/14 (85.7%)<br/> <b>12 mths:</b> Low 13/34 (47%), intern. 4/5 (71%), high 7/14 50% (p=0.06)<br/> 24 mths: low: 2/30 (6.7%), Intern. 3/4 (75%), 4/14 (38.6%)</p> <p><b>Time to relapse:</b><br/> Low: 334 days, Intern. &gt;720 days, high: 344 days</p> <p><b>Time to B-cell reconstitution:</b><br/> Total cohort: 295 days; low: 290, intern.: 304, high: 259 days)<br/> Excluding courses (54 of 117 courses) without B-cell recovery: 226 days</p> <p><b>AE:</b> minimal infusion reactions: several, clinically relevant 1; persistent hypogammaglobulinemia 2 8of those requiring IVIG 1)</p> |
| Takahashi T 2019 [143] Japan                            | Periodically repeated rituximab administrations in children with refractory nephrotic syndrome: 2-year multicenter observational study | Prospective study 5 centers                                     | Nephrotic syndrome Children Rituximab Repeated administration Mizoribine Calcineurin inhibitor | 22 | <p><b>Age at NS onset:</b> 3.9 (2.7-5.4) yrs<br/> <b>Age at RTX:</b> 11.2 (9.0-13.0) yrs<br/> <b>Duration of NS before RTX:</b> 7.3 (3.8-8.9) yrs<br/> <b>FU:</b> 2yrs after initial RTX 14 M, 8 F<br/> <b>Indication:</b> refractory FRNS or SDNS despite CNI (all, for 5.8 (3.5-8.4) yrs) and/or other IS agents (MZR 19, CPA 11), steroid</p>                                                                                                                                                                                                                                                                          | <p><b>RTX:</b> single dose of 375 mg/m<sup>2</sup> (max: 500 mg); repeated 4 times at 6-month intervals<br/> <b>Duration:</b><br/> <b>Other:</b> start of tapering of CNI with 1<sup>st</sup> RTX dose, discontinued 1 week later; tapering dose of oral steroids; MZR twice a week (500 mg/550 mg) after RTX, prophylaxis during B-cell depletion with</p>                                                                                                    | <p><b>Relapse-free survival rate</b> at 1yr and 2 yrs: 50% and 46%<br/> <b>Survival rate without FRNS/SDNS</b> at 1 yr and 2yrs: 91% and 86%<br/> <b>RR:</b> decreased from 5.8/pt.2yrs to 1/pt/2yrs (p&lt;0.001)<br/> <b>AE:</b> mild infusion reactions after 47% (4/188) of RTX administration; agranulocytosis 1/22 (4.5%), transient neutropenia 3 (13.6%), exacerbation of atopic dermatitis 3</p>                                                                                                                                                                                                                                                                                      |

| 1 <sup>st</sup> author, year, [Ref.], country of origin | Title of Publication                                                                                                                                      | Study design                                                                | Keywords                                                                                                       | N   | Population characteristics                                                                                                                                                                                                                                                                                                                                                            | Treatment                                                                                                                                                                                                                                                                                                                                                                                                                                                                                                  | Outcomes                                                                                                                                                                                                                                                                                                                                                                                                                                                                                                                                                                                                                                                                                                                                                                                                                                                                                                                                                                                                                                                                                                                                                                                                                                |
|---------------------------------------------------------|-----------------------------------------------------------------------------------------------------------------------------------------------------------|-----------------------------------------------------------------------------|----------------------------------------------------------------------------------------------------------------|-----|---------------------------------------------------------------------------------------------------------------------------------------------------------------------------------------------------------------------------------------------------------------------------------------------------------------------------------------------------------------------------------------|------------------------------------------------------------------------------------------------------------------------------------------------------------------------------------------------------------------------------------------------------------------------------------------------------------------------------------------------------------------------------------------------------------------------------------------------------------------------------------------------------------|-----------------------------------------------------------------------------------------------------------------------------------------------------------------------------------------------------------------------------------------------------------------------------------------------------------------------------------------------------------------------------------------------------------------------------------------------------------------------------------------------------------------------------------------------------------------------------------------------------------------------------------------------------------------------------------------------------------------------------------------------------------------------------------------------------------------------------------------------------------------------------------------------------------------------------------------------------------------------------------------------------------------------------------------------------------------------------------------------------------------------------------------------------------------------------------------------------------------------------------------|
| Chan 2020 [144] International                           | Both the rituximab dose and maintenance immunosuppression in steroid-dependent/frequently-relapsing nephrotic syndrome have important effects on outcomes | Multicenter retrospective study<br>11 centers (Asia, Europe, North America) | Biologics<br>Children<br>Immunosupp<br>Nephrotic syndrome<br>Rituximab<br>Steroid-dependent nephrotic syndrome | 511 | <p>toxicity</p> <p><b>Low dose:</b> n=191<br/><b>Medium dose:</b> n=208<br/><b>High dose:</b> n= 112</p> <p><b>Age at NS onset:</b> 3 (IQR 2.1-4.9) yrs<br/><b>Age at RTX:</b> 11.5 (IQR 8.1-14.3) yrs<br/><b>FU:</b> at least 18 mths; 4.3 (IQR, 2.7-5.9) yrs after RTX<br/>342M, 168 F<br/><b>Indications:</b> complicated SDNS, FRNS despite IS with CNL, CPA, levamisole, MMF</p> | <p>Sulfamethoxazole-trimethoprim and fluconazole; antihypertensive agents</p> <p><b>RTX:</b><br/><b>Low:</b> 375 mg/m<sup>2</sup> (with mIS: n=145, without: 46)<br/><b>Medium:</b> 750 mg/m<sup>2</sup> (with mIS: n=91, without n=117)<br/><b>High:</b> 1125-1500 mg/m<sup>2</sup> (with mIS: n=47, without: n=65)<br/><b>Other:</b> with (283, 55%) or without (228, 45%) maintenance immunosuppression (mIS) (including oral steroids, MMF, CNL) at first relapse or for at least 6 mths after RTX</p> | <p>(13.6%), steroid withdrawal syndrome 1(4.5%), electrocardiographic change 3 (13.6%) (neg. conversion of T wave 2; ST elevation 1) abnormalities 3; infectious episode (influenza 8, mycoplasma 1, other viral 16)</p> <p><b>Relapse-free survival:</b><br/>Similar among 3 dosing groups (log-rank test p=0.36)<br/>Low: 11.8 (10.1-15.8) mths<br/>Medium: 11.9 (10.4-14.3) mths<br/>High: 13.0 (11.8-17.4) mths<br/>Shorter in low dose group without mIS than in medium/high+mIS: 8.5 (7.2-13.3) mths vs. 12.7 (10.4-16.9)/14.3 (12.0-18.4) mths (log-rank, p=0.03)<br/><b>Relapses:</b> in 412 pts. (81%) after RTX<br/><b>Relapse-free period:</b> 12.5 mths (95% CI, 11.3-14)<br/><b>Risk factors of relapse:</b><br/>Low dose without mIS: HR<sub>adj</sub> 0.50-0.6 (95% CI, 0.33-0.94; p ≤ 0.023)<br/>Age at RTX: HR<sub>adj</sub> 0.95 (95% CI, 0.93-0.98; p=0.002) per 1-yr increase in age<br/>Previous IS: HR<sub>adj</sub> 1.19 (95% CI, 1.05-1.35; p=0.006) for each additional IS agent prior RTX<br/><b>Other IS:</b><br/><b>Without mIS:</b> withdrawal of steroids after RTX at 3 (2-4) mths, CNL at 2 (1-3) mths, MMF 0 (0-0.5) mths<br/><b>With mIS:</b> 1 mIS (165, 58%), 2 mIS (81, 29%), 3 mIS (37, 13%).</p> |

| 1 <sup>st</sup> author, year, [Ref.], country of origin                      | Title of Publication                                                                       | Study design                               | Keywords                                                                    | N  | Population characteristics                                                                                                                                                                                                                                                                                                                                                                                                     | Treatment                                                                                                                                                                                                                                     | Outcomes                                                                                                                                                                                                                                                                                                                                                                                                                                                                                                                                                                        |
|------------------------------------------------------------------------------|--------------------------------------------------------------------------------------------|--------------------------------------------|-----------------------------------------------------------------------------|----|--------------------------------------------------------------------------------------------------------------------------------------------------------------------------------------------------------------------------------------------------------------------------------------------------------------------------------------------------------------------------------------------------------------------------------|-----------------------------------------------------------------------------------------------------------------------------------------------------------------------------------------------------------------------------------------------|---------------------------------------------------------------------------------------------------------------------------------------------------------------------------------------------------------------------------------------------------------------------------------------------------------------------------------------------------------------------------------------------------------------------------------------------------------------------------------------------------------------------------------------------------------------------------------|
| <b>Observational studies comparing RTX with other steroid-sparing agents</b> |                                                                                            |                                            |                                                                             |    |                                                                                                                                                                                                                                                                                                                                                                                                                                |                                                                                                                                                                                                                                               |                                                                                                                                                                                                                                                                                                                                                                                                                                                                                                                                                                                 |
| <b>RTX vs. Tac</b><br>Sinha 2012 [145]<br>India                              | Short-term efficacy of rituximab versus Tacrolimus in steroid-dependent nephrotic syndrome | Prospective single center comparison study | Focal segmental glomerulosclerosis<br>Minimal change disease<br>proteinuria | 23 | <b>RTX Group: n=10</b><br><b>Tac Group: n=13</b><br><b>Age at NS onset:</b> 3.6 ± 1.5 yrs (RTX); 3.6 ± 2.2 yrs (Tac)<br><b>Age at SDNS:</b> 5.0 ± 2.0 yrs (RTX); 4.4 ± 2.2 yrs (Tac)<br><b>Age at RTX/Tac:</b> 12.2 ± 2.3 yrs (RTX), 12.3 ± 3.0 yrs (Tac)<br><b>FU:</b> 15.9 ± 4.7 mths (RTX); 19.7 ± 4.8 yrs (Tac)<br><b>18 M, 5 F</b><br><b>Indications:</b> SDNS despite therapy with at least 2 different agents (LEV 1-2) | <b>RTX:</b> 1-3 doses of 375 mg/m <sup>2</sup> week aiming for complete B-cell depletion<br><b>Tac:</b> 0.1-0.2 mg/kg/day in 2 divided doses for 12 mths, targeting trough levels 4-7 ng/ml<br><b>Co-treatment:</b> steroids in tapering dose | <b>Remission:</b> similar in both groups at 12 mths. (RTX: 50%, Tac 46.2%; p=0.63)<br><b>No. of relapses:</b> similar in both groups at 6 and 12 mths<br><b>RR:</b> similar decline in both groups: RTX: from 3.1 ± 1.1 to 0.8 ± 1.0 relapses/yr (95% CI 1.3-3.3, p<0.001)<br>Tac: from 3.5 ± 1.6 to 0.9 ± 1.1 relapses/yr (95% CI 1.7-3.7; p<0.001)<br><b>Time to relapse:</b> shorter in RTX than in Tac (8.5 ± 5.1 vs. 9.8 ± 5.6 mths) (95% CI -4.7; 7.3; p=0.65)<br><b>Steroid dose:</b> similar reduction of cumulative in both groups; discontinued in 8/10 RTX pts. And  |
|                                                                              |                                                                                            |                                            |                                                                             |    |                                                                                                                                                                                                                                                                                                                                                                                                                                |                                                                                                                                                                                                                                               | Steroids (159, 56%), CNI (135, 47%), MMF (144, 51%) given for 7 (5.8-10.2) mths.<br><b>B-cell depletion:</b> in 97% (442 of 454) after 7 and 14 days, similar among different regimens (p=0.47)<br><b>Additional RTX courses:</b> required in 327 (67%) after 1.2 yrs (IQR, 0.8-2 yrs) due to relapses (87%); B-cell-recovery (7%), non-compliance/ IS toxicity (6%).<br>Of those, 245 on mls.<br><b>AE:</b> in 85 of 511 (16%). Acute infusion reaction: 67, early infusion termination: 12, Infection 20 (1 pneumocystis jirovecii), neutropenia 13, hypogammaglobulinemia 56 |

| 1 <sup>st</sup> author, year, [Ref.], country of origin | Title of Publication                                                                                                                        | Study design                                 | Keywords                                                 | N   | Population characteristics                                                                                                                                                                                                                                       | Treatment                                                                                                                                                                                                       | Outcomes                                                                                                                                                                                                                                                                                                                                                                                                                                                    |
|---------------------------------------------------------|---------------------------------------------------------------------------------------------------------------------------------------------|----------------------------------------------|----------------------------------------------------------|-----|------------------------------------------------------------------------------------------------------------------------------------------------------------------------------------------------------------------------------------------------------------------|-----------------------------------------------------------------------------------------------------------------------------------------------------------------------------------------------------------------|-------------------------------------------------------------------------------------------------------------------------------------------------------------------------------------------------------------------------------------------------------------------------------------------------------------------------------------------------------------------------------------------------------------------------------------------------------------|
|                                                         |                                                                                                                                             |                                              |                                                          |     | yrs; CPH 12 wks; MMF 1-2 yrs), "difficult-to-treat NS", steroid toxicity                                                                                                                                                                                         |                                                                                                                                                                                                                 | 6/13 Tac pts.<br><b>B-cell depletion (RTX):</b> data available in 3 pts, recovery at 4-12 mths<br><b>AE: RTX:</b> infusion reaction 3, Tac: reversible nephrotoxicity 1                                                                                                                                                                                                                                                                                     |
| <b>RTX vs. CPA</b>                                      |                                                                                                                                             |                                              |                                                          |     |                                                                                                                                                                                                                                                                  |                                                                                                                                                                                                                 |                                                                                                                                                                                                                                                                                                                                                                                                                                                             |
| Webb 2016 [146] UK                                      | Cyclophosphamide and rituximab in frequently relapsing/steroid-dependent nephrotic syndrome                                                 | Retrospective chart reviews<br>Single center | FRNS<br>SDNS<br>Cyclophosphamide<br>Rituximab<br>Outcome | 102 | CPA only: n=59<br>RTX: n=42, of those 34 after CPH, 8 RTX only<br><b>Age at treatment:</b><br>CPA: 6 yrs<br>RTX: 7.5 yrs<br>CPA+RTX: 11 yrs<br>79 M, 34 F<br><b>Indication:</b> FRNS/SDNS despite LEV, CNI, MMF, steroid toxicity                                | <b>CPA:</b> dosage not stated<br><b>RTX:</b> Single (n=10) or two doses (n=32) of 750 mg/m <sup>2</sup> , 2 weeks apart<br><b>Co-treatment:</b> steroids in tapering dose, LEV, CNI, MMF                        | <b>Remission at 24 mths:</b> CPH: 24%, RTX: 32%<br><b>RR:</b><br><b>Time to relapse:</b><br>CPH 7 mths<br>RTX 14 mths<br><b>Withdrawal of steroids:</b><br>CPH: 67 (84%) weaned off at 3 mths<br>RTX: 36 (86%) weaned off at 3 mths<br><b>Time off-predn. To relapse:</b><br>CPH: 3 mths<br>RTX: 12 mths<br><b>B-cell depletion (RTX): n.a.</b><br><b>AE:</b><br>CPH: neutropenia 3, hair loss, hemorrhagic cystitis 1<br>RTX: allergic infusion reaction 2 |
| Kari 2020 [147] Saudi-Arabia                            | Rituximab versus Cyclophosphamide as first steroid-sparing agent in childhood frequently relapsing and steroid-dependent nephrotic syndrome | Prospective non-randomized study<br>2 center | Nephrotic syndrome<br>Rituximab<br>Cyclophosphamide      | 46  | CPA n=27<br>RTX n=19<br><b>Age at NS onset:</b> n.a.<br><b>Age at medication start:</b><br>CPA: 68.2 (55.1-81.2) mths<br>RTX: 86.2 (66.7-105.6) mths<br><b>FU:</b> at least 12 months after CPA/RTX<br><b>Indications:</b> FRNS/SDNS, only steroids with/without | <b>CPA:</b> 3 mg/kg/day orally for 8 weeks<br><b>RTX:</b> 2 doses of 375 mg/m <sup>2</sup> /dose, 2 weeks apart<br><b>Duration:</b> see above<br><b>Other:</b> oral steroids a.d., ACEI (CPA: 47.4%, RTX 74.1%) | <b>Relapse-free survival at 1yr:</b><br>CPA 17/27 (58.6%)<br>RTX 16/19 (84.2%)<br><b>Withdrawal of steroids at 3 mths:</b><br>CPA 8 (29.6%), RTX 14 (73.7%) (p<0.003)<br><b>Reduction of a.d. steroid dose:</b><br>CPA: from 1.02 to 0.36 mg/kg (p<0.001)<br>RTX: from 0.86 to 0.08 mg/kg (p<0.001)<br><b>Time to relapse:</b>                                                                                                                              |

| 1 <sup>st</sup> author, year, [Ref.], country of origin | Title of Publication                                                                                                                                | Study design                       | Keywords                                                                           | N  | Population characteristics                                                                                                                                                                                                                                                                                              | Treatment                                                                                                                                                                                                                                                                                                                                                                                                                                                                      | Outcomes                                                                                                                                                                                                                                                                                                                                                                                                                                                                                                                                                                                                         |
|---------------------------------------------------------|-----------------------------------------------------------------------------------------------------------------------------------------------------|------------------------------------|------------------------------------------------------------------------------------|----|-------------------------------------------------------------------------------------------------------------------------------------------------------------------------------------------------------------------------------------------------------------------------------------------------------------------------|--------------------------------------------------------------------------------------------------------------------------------------------------------------------------------------------------------------------------------------------------------------------------------------------------------------------------------------------------------------------------------------------------------------------------------------------------------------------------------|------------------------------------------------------------------------------------------------------------------------------------------------------------------------------------------------------------------------------------------------------------------------------------------------------------------------------------------------------------------------------------------------------------------------------------------------------------------------------------------------------------------------------------------------------------------------------------------------------------------|
|                                                         |                                                                                                                                                     |                                    |                                                                                    |    | levamisole before                                                                                                                                                                                                                                                                                                       |                                                                                                                                                                                                                                                                                                                                                                                                                                                                                | CPA: 6.9 mths (10/27, 37%), RTX (3/19, 15.8%); 6.3 mths<br><b>AE:</b><br>CPA: transient leucopenia (6, 22%), acute hepatotoxicity (1, 3.5%)<br>RTX: mild infusion reaction (1, 5.2%)                                                                                                                                                                                                                                                                                                                                                                                                                             |
| <b>Different agents including RTX</b>                   |                                                                                                                                                     |                                    |                                                                                    |    |                                                                                                                                                                                                                                                                                                                         |                                                                                                                                                                                                                                                                                                                                                                                                                                                                                |                                                                                                                                                                                                                                                                                                                                                                                                                                                                                                                                                                                                                  |
| <b>After RTX: CSA vs. MMF</b>                           |                                                                                                                                                     |                                    |                                                                                    |    |                                                                                                                                                                                                                                                                                                                         |                                                                                                                                                                                                                                                                                                                                                                                                                                                                                |                                                                                                                                                                                                                                                                                                                                                                                                                                                                                                                                                                                                                  |
| Fujinaga S 2013 [86], Japan                             | Cyclosporine versus Mycophenolate mofetil for maintenance of remission of steroid-dependent nephrotic syndrome after a single infusion of rituximab | Prospective study<br>Single center | Cyclosporine<br>Mycophenolate<br>Rituximab<br>Steroid-dependent nephrotic syndrome | 29 | <b>CSA after RTX:</b> n=13<br><b>MMF after RTX:</b> n=16<br><b>Age at onset of NS:</b> 6.4 ± 3.9 yrs<br><b>Age at RTX:</b> 11.8 ± 4.3 yrs<br><b>FU:</b> 19M, 10 F<br><b>Indication:</b> severe SDNS despite CSA (for 49±35 mths) and/or MMF<br>Immunosuppr. agents at RTX: CSA 13, MMF 11, CSA and MMF 4, CSA and MZR 1 | <b>RTX:</b> Single dose of 375 mg/m <sup>2</sup> (max. 500 mg)<br><b>Duration of B-cell depletion:</b> 5 mths<br><b>After RTX:</b><br><b>CSA group:</b> dose adjusted to C2 level of 400-500 ng/ml; mean dose 3.7 mg/kg/d.<br>MMF and MZR discontinued.<br><b>Duration after RTX:</b> 18 (5-29) mths<br><b>MMF group:</b> adjusted to target MPA levels of 2-5 µg/ml. CSA discontinued<br><b>Duration after RTX:</b> 19 (7-44) mths<br><b>Other:</b> Tapering dose of steroids | <b>Relapse after RTX:</b><br>CSA: 3/13<br>MMF: 12/16<br><b>Treatment failure:</b><br>CSA: 2/13<br>MMF: 7/16<br><b>RR:</b><br>CSA: decrease from 4.4 ± 1.9 to 0.6±1.4/yr (86%, p<0.01)<br>MMF: decrease from 2.3±0.8 to 1.0±0.9/yr (58%, p<0.01)<br><b>Steroid dose:</b><br>CSA: decrease from 0.35±0.16 to 0.057±0.14 mg/kg/day (p<0.01)<br>MMF: decrease from 0.38±0.26 to 0.15±0.21 mg/kg/d (p<0.01)<br><b>Dose of agent after RTX:</b><br>CSA: decrease from 4.6 to 3.7 mg/kg/d (21%, p<0.01).<br>MMF:<br><b>AE:</b><br>RTX: transient infusion reaction: 13/29 (45%),<br>CSA: Hypertichosis all. Mild CsAN 3 |

| 1 <sup>st</sup> author, year, [Ref.], country of origin                      | Title of Publication                                                                                                                                | Study design                       | Keywords                                                                                              | N  | Population characteristics                                                                                                                                                                                                                                                                     | Treatment                                                                                                                                                                                                                                                                                                                                                                                                                 | Outcomes                                                                                                                                                                                                                                                                                                                                                                                                                                                                                                                                                                    |
|------------------------------------------------------------------------------|-----------------------------------------------------------------------------------------------------------------------------------------------------|------------------------------------|-------------------------------------------------------------------------------------------------------|----|------------------------------------------------------------------------------------------------------------------------------------------------------------------------------------------------------------------------------------------------------------------------------------------------|---------------------------------------------------------------------------------------------------------------------------------------------------------------------------------------------------------------------------------------------------------------------------------------------------------------------------------------------------------------------------------------------------------------------------|-----------------------------------------------------------------------------------------------------------------------------------------------------------------------------------------------------------------------------------------------------------------------------------------------------------------------------------------------------------------------------------------------------------------------------------------------------------------------------------------------------------------------------------------------------------------------------|
| Fujinaga S 2015 [87], Japan                                                  | Positive role of rituximab in switching from cyclosporine to mycophenolate mofetil for children with high-dose steroid-dependent nephrotic syndrome | Prospective study<br>Single center | SDNS<br>Rituximab<br>Cyclosporine<br>MMF                                                              | 26 | <b>Age at NS onset:</b> 7.0 ± 4.0 yrs<br><b>Age at CSA:</b> 8.3 ± 4.1 yrs<br><b>Age at MMF:</b> 12.1 ± 4.0 yrs<br><b>FU:</b> after MMF start: 28.8 ± 9.9 mths<br>16M, 10F<br><b>Indication:</b> complicated SDNS despite CSA (for 46.5±27.2 mths), CSAN in 11 pts (42%) with CSA > 24 mths     | <b>MMF</b> started at initial dose 250 mg/12h, adjusted to MPA trough level of 2-5 µg/ml (max. 1g bd).<br>After MMF start: CSA dosage gradually tapered<br>Duration:<br>Other: tapering dose of steroids; steroids fro relapses.<br><b>In case of MMF treatment failure: RTX</b> (n=11): single dose of 375 mg/m <sup>2</sup> (max. 500 mg)<br><b>Duration:</b><br>Other: tapering dose of steroids; steroids for relapse | <b>Remission</b> despite CSA withdrawal: 11/26 (42%)<br><b>MMF Failure and RTX:</b> 11/26 (42%)<br><b>Sustained remission &gt; 1 yr</b> without steroids: 22/26 (85%)<br><b>Discontinuation of MMF:</b> 15/26 (58%)<br><b>RR:</b> with CSA: 1.0±0.9/yr; with MMF and RTX 0.7±0.5/yr (p=0.07)<br><b>AE:</b> MMF: mild gastrointestinal symptoms 2, herpes simplex 2<br><b>RTX:</b> mild infusion reactions 5/11, late-onset neutropenia requiring G-CSF 1/11                                                                                                                 |
| <b>Immunological aspects of RTX (B cell recovery, hypogammaglobulinemia)</b> |                                                                                                                                                     |                                    |                                                                                                       |    |                                                                                                                                                                                                                                                                                                |                                                                                                                                                                                                                                                                                                                                                                                                                           |                                                                                                                                                                                                                                                                                                                                                                                                                                                                                                                                                                             |
| Delbe-Bertin 2013 [148] France                                               | Does rituximab induce hypogammaglobulinemia in patients with idiopathic nephrotic syndrome?                                                         | prospective single-center study    | Rituximab<br>Immunoglobulin G<br>Hypogammaglobulinemia<br>Nephrotic syndrome<br>Immunosupp<br>ression | 12 | <b>RTX group</b> with minimal B cell depletion of 3 mths, aiming for 18 mths: n=12<br><b>Oral IS Group;</b> n=16<br><b>Age at NS onset:</b><br>RTX: 7.9 ± 5.6 yrs<br>Oral IS: 5.7 ± 3.7 yrs<br><b>FU:</b> at least 6 mths after 1 <sup>st</sup> RTX<br><b>Indication:</b> SDNS, CNI dependency | <b>RTX group:</b> 1-4 doses of 375 mg/m <sup>2</sup> , CD19 depletion controlled after 7 days with flow cytometry assay;<br>In case of reappearance: additional dose of RTX (mean 4.2 ± 2.48 infusions)<br><b>Other:</b> MMF/CSA/CPA: 12/12<br><b>Oral IS Group:</b> oral steroids, MMF and/or CSA/ Tac                                                                                                                   | <b>Serum IgG Levels:</b><br><b>RTX:</b> 8/12 decreased IgG level before RTX, of those 7 with persistent Hypo-IgG during B-cell depletion.<br>4/12 with normal IgG levels before RTX and during B-cell depletion.<br><b>Oral IS:</b> normal IgG levels at baseline and last FU. Transient episodes of low IgG levels 5/16, prolonged > 3 mths in 2.<br><b>Infection risk I/VIG:</b><br><b>RTX:</b> 2/12 received I/VIG during Hypo-IgG as prevention for infections. 1 aseptic meningitis<br>Oral IS: no infectious complications requiring hospitalization. Single I/VIG 1. |



| 1 <sup>st</sup> author, year, [Ref.], country of origin | Title of Publication                                                                           | Study design                                     | Keywords                                                        | N                                   | Population characteristics                                                                                                                                                                                                                                                                                                    | Treatment                                                                                                                                                                                                                                                             | Outcomes                                                                                                                                                                                                                                                                                                                                                                                                                                                                                                                                                                                                                                                                                                                                                                                                                                                                                                                                                                                                                                                                                                                         |
|---------------------------------------------------------|------------------------------------------------------------------------------------------------|--------------------------------------------------|-----------------------------------------------------------------|-------------------------------------|-------------------------------------------------------------------------------------------------------------------------------------------------------------------------------------------------------------------------------------------------------------------------------------------------------------------------------|-----------------------------------------------------------------------------------------------------------------------------------------------------------------------------------------------------------------------------------------------------------------------|----------------------------------------------------------------------------------------------------------------------------------------------------------------------------------------------------------------------------------------------------------------------------------------------------------------------------------------------------------------------------------------------------------------------------------------------------------------------------------------------------------------------------------------------------------------------------------------------------------------------------------------------------------------------------------------------------------------------------------------------------------------------------------------------------------------------------------------------------------------------------------------------------------------------------------------------------------------------------------------------------------------------------------------------------------------------------------------------------------------------------------|
| Delbet 2019 [149] France                                | Idiopathic nephrotic syndrome and rituximab: may we predict circulating B lymphocytes recovery | Retrospective study<br>Single center             | Nephrotic syndrome<br>Rituximab<br>Children<br>B cell depletion | 22                                  | <b>Age at NS onset:</b> 4.15 (1.4-14.6) yrs<br><b>Disease duration before 1<sup>st</sup> RTX:</b> 3.1 (0.4-14.8) yrs<br><b>Age at RTX:</b> 10.4 (4-16.6) yrs<br><b>FU:</b><br>17 M, 5 F<br><b>Indication:</b> SDNS (n=18) or SRNS (n=4) despite previous IS (prednisone 22, MP Pulses 14, LEV 11, CSA 18, MMF 17, oral CPA 9) | <b>RTX:</b> 1-4 doses of 375 mg/m <sup>2</sup><br><b>Other:</b> oral steroids in tapering dose (21), CNI+MMF (14), CSA (3), MMF (2), Tac (1)<br>-> stopped 2 mths after RTX                                                                                           | <b>Total duration of B cell depletion:</b> 26 (6-66) mths<br><b>Individual B cell depletion duration post-RTX:</b> 5.1 (1.6-14) mths<br><b>Comparison in each patient (1<sup>st</sup> and next B cell depletion):</b><br>59% of next B cell depletion: same duration within interval ± 1 mth<br>70% within interval ± 2 mths<br><br>No difference in B cell depletion duration between groups who received 1-2 and 3-4 infusions<br><b>Relapses during 24 mths after RTX:</b> 14 pts. (50%), of those 4 before 9 mths, 4 9-12 mths, 6 > 12 mths<br><br><b>% of total lymphocytes for each B cell subpopulation:</b><br><b>Baseline:</b> no differences in total B cells; memory cells, iGM memory, switched memory B cells; but lower transitional and mature B cells.<br><b>Day 2-7 and 1 mth after RTX:</b> complete depletion (<1% of total lymphocytes) after single RTX infusion<br><br><b>B-Cell recovery:</b> total B-cells reappeared at median 6 mths after RTX; completely recovered after 12 mths (transitional, mature and finally memory B cells; very slow recovery of total memory; iGM memory; switched memory B |
| Colucci 2016 [150] Italy                                | B Cell reconstitution after rituximab treatment in idiopathic nephrotic syndrome               | Retrospective comparative study<br>Single center | Rituximab<br>Nephrotic syndrome<br>B cell reconstitution        | 28, compared to 28 healthy controls | <b>Age at NS onset:</b> 5.22 ± 0.72 yrs<br><b>Age at RTX:</b> 13.68 ± 0.77 yrs<br><b>FU:</b> 11.2 (8-17.7) mths<br>18 M, 10 F<br><b>Indication:</b> SDNS, FRNS despite previous IS (CNIS 17 (60.7%), MMF 21 (75%), Azathioprine (1 (3.6%))                                                                                    | <b>RTX:</b> 1 dose (24, 85.7%) or 2 doses (4, 14.3%) of 375 mg/m <sup>2</sup><br><b>Other:</b> steroids in tapering dose, IS (MMF, CNI) gradually tapered<br><br><b>Aim:</b> Determining by flow cytometry levels of B and T cell subpopulations before and after RTX | <b>% of total lymphocytes for each B cell subpopulation:</b><br><b>Baseline:</b> no differences in total B cells; memory cells, iGM memory, switched memory B cells; but lower transitional and mature B cells.<br><b>Day 2-7 and 1 mth after RTX:</b> complete depletion (<1% of total lymphocytes) after single RTX infusion<br><br><b>B-Cell recovery:</b> total B-cells reappeared at median 6 mths after RTX; completely recovered after 12 mths (transitional, mature and finally memory B cells; very slow recovery of total memory; iGM memory; switched memory B                                                                                                                                                                                                                                                                                                                                                                                                                                                                                                                                                        |

| 1 <sup>st</sup> author, year, [Ref.], country of origin | Title of Publication                                                                                   | Study design                      | Keywords                                                                                                                     | N  | Population characteristics                                                                                                                                                                                                                                                                                                                                                                                                                                                         | Treatment                                                                                                                                                                                                                                                                                                              | Outcomes                                                                                                                                                                                                                                                                                                                                                                                                                                                                                                                                                                                            |
|---------------------------------------------------------|--------------------------------------------------------------------------------------------------------|-----------------------------------|------------------------------------------------------------------------------------------------------------------------------|----|------------------------------------------------------------------------------------------------------------------------------------------------------------------------------------------------------------------------------------------------------------------------------------------------------------------------------------------------------------------------------------------------------------------------------------------------------------------------------------|------------------------------------------------------------------------------------------------------------------------------------------------------------------------------------------------------------------------------------------------------------------------------------------------------------------------|-----------------------------------------------------------------------------------------------------------------------------------------------------------------------------------------------------------------------------------------------------------------------------------------------------------------------------------------------------------------------------------------------------------------------------------------------------------------------------------------------------------------------------------------------------------------------------------------------------|
| Colucci M 2019 [154], Italy                             | Prolonged Impairment of Immunological Memory after anti-CD20 treatment in pediatric nephrotic syndrome | Retrospective observational study | Immunologic memory, hypogammaglobulinemia, B cells, clinical immunology, pediatric nephrology, idiopathic nephrotic syndrome | 27 | <p><b>Anti-CD-20 treatment:</b> n=27<br/> <b>Prolonged oral IS:</b> n=21 (= "control group")</p> <p><b>Age at NS onset:</b> 5.1 (2.0-13.7) yrs<br/> <b>Age at 1<sup>st</sup> anti-CD20 treatment:</b> 12.9 (5.8-21.2) yrs<br/> <b>Age at last FU:</b> 19.1 (9.6-27.0) yrs<br/> <b>FU:</b> at least 4 yrs after 1<sup>st</sup> RTX or Ofatumumab (74 (48-118) mths), and 2 yrs after last infusion (70 (26-113) mths)<br/> <b>18 M, 9F</b><br/> <b>Indication:</b> SDNS (n=25).</p> | <p><b>Anti-CD20-treatment:</b><br/> <b>RTX</b> 1<sup>st</sup> dose with 375 mg/m<sup>2</sup><br/> Additional doses given in case of relapses, 11/27 with multiple infusions (≥ 2), of those received 2 ofatumumab (1500 mg/1.73m<sup>2</sup>)</p> <p><b>Other:</b> steroids in tapering dose, IS gradually tapered</p> | <p><b>Relapses</b> within 3 yrs (6-32 mths): 20 (74%)<br/> <b>Relapse rate at last FU:</b> reduced from 3.4 (1-5) relapses/yr to 0.6 (0-2) per year (p&lt;0.001).<br/> <b>Withdrawal of steroids/IS at last FU:</b> 10/27 discontinued all IS, 6/27 on prednisone, 4/27 on CN1, 14/27 on MMF, 2/27 on prednisone and 2 agents.</p> <p><b>B-cell recovery:</b> at last FU all recovered, but distributions of B cells subsets altered (anti-CD 20 pts: reduced proportion of memory B-cell compartment) compared to "control groups".<br/> Delayed switched memory B-cell reconstitution more in</p> |
|                                                         |                                                                                                        |                                   |                                                                                                                              |    |                                                                                                                                                                                                                                                                                                                                                                                                                                                                                    |                                                                                                                                                                                                                                                                                                                        | <p>cells), more delayed in non-relapsers</p> <p><b>Total CD3+ T cells</b> at baseline: normal range, no variations at 12 months<br/> <b>CD4<sup>+</sup>/CD8<sup>+</sup> cell ratio:</b> lower range of normal at baseline, normalized 12 mths after RTX</p> <p><b>Predictors of Relapse:</b><br/> Significant association with recovery of switched memory cells and time to relapse (HR 3.45, 95% CI 1.39-8.54, p&lt;0.01).<br/> At 9 mths: Pts. with switched memory B cells &lt;0.067% of total lymphocytes had a significantly lower risk of relapse within 24 mths (p&lt;0.001)</p>            |

| 1 <sup>st</sup> author, year, [Ref.], country of origin | Title of Publication | Study design | Keywords | N | Population characteristics                          | Treatment | Outcomes                                                                                                                                                                                                                                                                                                                                                                                                                                                                                                                                                                                                                                                                                                                                                                                                                                                                                                                                                                                                                                                                                                                                         |
|---------------------------------------------------------|----------------------|--------------|----------|---|-----------------------------------------------------|-----------|--------------------------------------------------------------------------------------------------------------------------------------------------------------------------------------------------------------------------------------------------------------------------------------------------------------------------------------------------------------------------------------------------------------------------------------------------------------------------------------------------------------------------------------------------------------------------------------------------------------------------------------------------------------------------------------------------------------------------------------------------------------------------------------------------------------------------------------------------------------------------------------------------------------------------------------------------------------------------------------------------------------------------------------------------------------------------------------------------------------------------------------------------|
|                                                         |                      |              |          |   | FRNS (n=2), despite previous IS (CNI, MMF, CNI+MMF) |           | <p>nonrelapsers.</p> <p><b>Serum Ig Levels</b> (at baseline and last FU): 6/13 had low IgG at baseline and last FU (&lt;600 mg/dl), 1 developed severe hypogammaglobulinemia (IgG &lt;160 mg/dl). 5/13 with <i>de novo</i> severe hypogammaglobulinemia, of those 3 requiring IVIG. <i>De novo</i> IgA deficiency in 4/13 IgG/IgA-def. independent of no. of RTX infusions.</p> <p>No low IgG or IgA levels in "control group" with only oral IS.</p> <p>Risk factor for hypogammaglobulinemia: younger age at 1<sup>st</sup> RTX infusion (OR: 2.14/yr. 95% CI 1.25-3.68, p=0.006)</p> <p>Severe hypogammaglobulinemia more frequent in nonrelapsers.</p> <p><b>Vaccine Competence:</b></p> <p>Reduced IgG levels against HV and tetanus at baseline, further declined at last FU. Antigen-specific memory B-cells were induced by re-immunization but specific IgG titers remained low.</p> <p><b>AE:</b> 18/27 (67%), infections 12, moderate low IgG level (&lt;700 mg/dl) 7, severe low IgG (&lt;160 mg/dl) 4.</p> <p>Higher infection rate associated with CNI as maintenance IS but only slightly correlated with low IgG at last FU.</p> |

| 1 <sup>st</sup> author, year, [Ref.], country of origin | Title of Publication                                                                                | Study design                         | Keywords                                                                                  | N   | Population characteristics                                                                                                                                                                                                                                                     | Treatment                                                                                                                                     | Outcomes                                                                                                                                                                                                                                                                                                                                                                                                                                                                                                                                                                                                                                                                                                                                                                                                                                                                                |
|---------------------------------------------------------|-----------------------------------------------------------------------------------------------------|--------------------------------------|-------------------------------------------------------------------------------------------|-----|--------------------------------------------------------------------------------------------------------------------------------------------------------------------------------------------------------------------------------------------------------------------------------|-----------------------------------------------------------------------------------------------------------------------------------------------|-----------------------------------------------------------------------------------------------------------------------------------------------------------------------------------------------------------------------------------------------------------------------------------------------------------------------------------------------------------------------------------------------------------------------------------------------------------------------------------------------------------------------------------------------------------------------------------------------------------------------------------------------------------------------------------------------------------------------------------------------------------------------------------------------------------------------------------------------------------------------------------------|
| Parmentier 2020 [152] France                            | Immunoglobulin serum levels in rituximab-treated patients with steroid-dependent nephrotic syndrome | Retrospective chart review           | Hypogammaglobulinemia<br>Immunoglobulin G<br>Infection<br>Nephrotic syndrome<br>Rituximab | 107 | <b>Age at NS onset:</b> 3.1 (IQR, 2.24-5.45) yrs<br><b>Age at RTX:</b> 11.7 (8.6-14.2) yrs<br><b>FU:</b> 4.02 (2.7-5.8) yrs after 1 <sup>st</sup> RTX<br>70 M, 37 F<br><b>Indications:</b> difficult-to-treat SDNS despite prior IS (CPA 29%, MMF 74.8%, CNI 86.9%, LEV 19.6%) | <b>RTX: 375 mg/m<sup>2</sup>/dose</b><br>Single dose: 1/1/107<br>Multiple doses: 96/107<br>No. of RTX infusions: 4 (IQR 3-5)<br><b>Other:</b> | <b>Hypo-IgG:</b><br><b>Before RTX:</b> 21/107 (19.6%), Infections 4/21, remained 1 yr after B-cell recovery 8/21<br><b>During RTX:</b> 25 (23.4%), 1 <sup>st</sup> episode at 15 (7.4-36.2) mths after 1 <sup>st</sup> RTX, Infections 9/25, remained 1 yr after B cell recovery 13/25<br><b>Risk factor for Hypo-IgG after RTX initiation:</b> younger age at RTX initiation (<7 yrs)<br><b>Risk for infections with Hypo-IgG:</b> younger age at RTX initiation: 6.5 (5.2-14.6) yrs in group with concomitant infections vs. 10.3 (7.2-12.4) yrs in group without inf.<br><b>Duration B-cell depletion:</b><br>19.8 (13.2-26.4) months with 1500 mg/m <sup>2</sup> (IQR 1125-1875) cumulative RTX dose<br><b>AE:</b> Infections in 13/46 with Hypo-IgG: 7 with hospitalization. Pneumonia 5, fulminant viral myocarditis 1, viral meningitis 1, ENT infections 4, Varicella 1, EBV 1. |
| <b>RTX – adverse events in nephrotic syndrome</b>       |                                                                                                     |                                      |                                                                                           |     |                                                                                                                                                                                                                                                                                |                                                                                                                                               |                                                                                                                                                                                                                                                                                                                                                                                                                                                                                                                                                                                                                                                                                                                                                                                                                                                                                         |
| Fujinaga S, 2016 [153] Japan<br>Only abstract           | Late-onset adverse effects after a single dose of rituximab in children with                        | Retrospective study<br>Single center |                                                                                           | 60  | <b>Age at NS onset:</b><br><b>Age at RTX:</b><br><b>FU:</b><br><b>Indication:</b> complicated SDNS                                                                                                                                                                             | <b>RTX:</b> single dose of 375 mg/m <sup>2</sup><br>Additional doses given (total 126 doses) in case of relapse/ B-cell recovery              | <b>Severe neutropenia</b> (neutrophil count < 500/mm <sup>3</sup> ): 3<br><b>Hypo-IgG (&lt; 500 mg/dl):</b> 9, of those requiring hospitalizations 2                                                                                                                                                                                                                                                                                                                                                                                                                                                                                                                                                                                                                                                                                                                                    |

| 1 <sup>st</sup> author, year, [Ref.], country of origin | Title of Publication                                                                 | Study design | Keywords                                                                                               | N           | Population characteristics                                                                                                                                                                                                    | Treatment                                                                                                                                                                            | Outcomes                                                                                                                                                                                                             |
|---------------------------------------------------------|--------------------------------------------------------------------------------------|--------------|--------------------------------------------------------------------------------------------------------|-------------|-------------------------------------------------------------------------------------------------------------------------------------------------------------------------------------------------------------------------------|--------------------------------------------------------------------------------------------------------------------------------------------------------------------------------------|----------------------------------------------------------------------------------------------------------------------------------------------------------------------------------------------------------------------|
| available                                               | complicated SDNS                                                                     |              |                                                                                                        |             |                                                                                                                                                                                                                               | Other: oral steroid in tapering dose for 6 mths, after RTX maintenance continued with CsA orMMF                                                                                      | due to bacterial infections<br><b>B-cell depletion:</b> 5 (1-20) mths                                                                                                                                                |
| Maeda R 2018 [154] Japan                                | Serum sickness with refractory nephrotic syndrome following treatment with rituximab | Case report  | SDNS<br>Refractory nephrotic syndrome<br>Rituximab<br>Human anti-chimeric antibodies<br>Serum sickness | Case report | <b>Age at NS onset:</b> 7 yrs<br><b>Age at RTX:</b> 14 yrs (after 9 relapses)<br><b>Age at RISS:</b> 17 yrs<br>1F<br><b>Indication:</b> refractory SDNS, treated with CsA and RTX and prednisolone (prior treatment with MZR) | <b>RTX:</b> 375 mg/m <sup>2</sup> as single dose<br><b>Duration:</b> remission after RTX for 24 mths, then 10h relapse, repeating RTX infusions)<br><b>Other:</b> CsA, oral steroids | Symptoms 10 days after 5 <sup>th</sup> RTX infusion: fever, rash, arthralgia (RTX-induced serum sickness: RISS, caused by elevated levels of human anti-chimeric antibodies (HACAs), produced after antigen exposure |

**Table S8.6: Mizoribine (MZR)**

| 1 <sup>st</sup> author, year, [Ref.], country of origin | Title of Publication                                                                                                                        | Study design                                            | Keywords                                                                                            | N  | Population characteristics                                                                                                                                                                                                                                               | Treatment                                                                                                                                                                                                                                       | Outcomes                                                                                                                                                                                                                                                                                                                                                      |
|---------------------------------------------------------|---------------------------------------------------------------------------------------------------------------------------------------------|---------------------------------------------------------|-----------------------------------------------------------------------------------------------------|----|--------------------------------------------------------------------------------------------------------------------------------------------------------------------------------------------------------------------------------------------------------------------------|-------------------------------------------------------------------------------------------------------------------------------------------------------------------------------------------------------------------------------------------------|---------------------------------------------------------------------------------------------------------------------------------------------------------------------------------------------------------------------------------------------------------------------------------------------------------------------------------------------------------------|
| <b>MIZORIBINE (MZR)</b>                                 |                                                                                                                                             |                                                         |                                                                                                     |    |                                                                                                                                                                                                                                                                          |                                                                                                                                                                                                                                                 |                                                                                                                                                                                                                                                                                                                                                               |
| Ohtomo Y, 2005 [155] Japan                              | High-dose mizoribine therapy for childhood-onset frequently relapsing steroid-dependent nephrotic syndrome with cyclosporine nephrotoxicity | Retrospective chart review<br>Single center             | Cyclosporin nephropathy<br>Frequent relapsing steroid-dependent nephrotic syndrome<br>Mizoribine    | 9  | <b>Age at NS onset:</b> 38.0 (22-95) mths<br><b>Age at MZR:</b> 17.8 (13-20) yrs<br><b>FU:</b> at least 12 mths after MZR<br><b>Indications:</b> FRNS, SDNS despite prior CSA and after long-term CSA (108.4 (46-206 mths); CSA-dependence) with moderate to severe CSAN | <b>MZR:</b> 10.1 (6.97-16.44 mg/kg/day<br><b>Duration:</b> at least 12 mths<br><b>Other:</b> CSA, oral steroids                                                                                                                                 | <b>Relapses:</b> 2/9 relapse-free, 5/9 steroid-responsive relapses, 2/7 MZR failure and developed SRNS<br><b>RR:</b> decreased from 2.33 ± 0.71/yr to 1.11 ± 0.78/yr<br><b>Cumulative CSA-dose:</b> 7/9 pts.: reduced from 3.2±0.83 to 1.75±0.79 mg/kg/day<br><b>Cumulative steroid dose:</b> 0.21±0.07 and 0.19±0.11 mg/kg/d<br><b>AE:</b> herpes zoster 1/9 |
| Kawasaki Y, 2005 [156] Japan                            | Oral mizoribine pulse therapy for patients with steroid-resistant and frequently relapsing steroid-dependent nephrotic syndrome             | Retrospective chart review<br>Single center             | Children<br>Clinical<br>Mizoribine oral pulse therapy<br>Nephrotic syndrome<br>Steroid-resistant NS | 8  | <b>Age at NS onset:</b> 5.0 ± 2.4 yrs<br><b>Age at MZR:</b> not stated<br><b>Duration of NS before MZR:</b> 68 ± 25 mths<br><b>FU:</b> range 13-24 mths<br><b>Indications:</b> CSA-dependent SDNS, prior CPA (4)                                                         | <b>MZR:</b> 10 mg/kg/day in 3 divided doses (max: 500 mg/d) on 2 days a week<br><b>Duration:</b> 12-24 mths<br><b>Other:</b> oral steroids a.d., CSA                                                                                            | <b>Remission:</b> 4/8 without further relapses, 2/4 discontinued CSA and steroids, 2/4 CSA, 4/8 "non-responder" with further relapses<br><b>RR:</b> not stated<br><b>AE:</b> uricaemia 1 (controlled with allopurinol)                                                                                                                                        |
| Fujinaga S, 2011 [157] Japan                            | Single daily high-dose mizoribine therapy for children with steroid-dependent nephrotic syndrome prior cyclosporine administration          | Retrospective analysis<br>2 centers                     | High-dose mizoribine<br>Steroid-dependent nephrotic syndrome<br>Cyclosporine                        | 10 | <b>Age at NS onset:</b> 3.2 ± 1.3 yrs<br><b>Age at MZR:</b> 6.2 ± 2.6 yrs<br><b>FU:</b> 33 mths<br>9 M, 1F<br><b>Indications:</b> SDNS before CSA administration, prior agents CPM (4)                                                                                   | <b>MZR:</b> 5 mg/kg as single dose, adjusted to 2-hr post-dose mZR level of 3 (2-5) µg/ml (max: 300 mg/day); mean dose: 8.4 mg/kg/day<br><b>Duration:</b> 22 (10-30) mths<br><b>Other:</b> oral steroids in tapering dose, CPA (1), no ACEI/ARB | <b>Remission:</b><br><b>RR:</b> reduced from 3.0 (1-3)/yr to 0.4 (0-1.2)/yr<br><b>Time to relapse:</b><br><b>Steroid dose:</b> reduced from 0.78 ± 0.32 to 0.31 ± 0.22 mg/kg alternate daily<br><b>AE:</b> not stated                                                                                                                                         |
| Xia 2019 [158], China                                   | Usefulness of mizoribine administration in children with frequently                                                                         | Propective multicenter observational study<br>4 centers | Frequently relapsing nephrotic syndrome<br>Mizoribine                                               | 82 | <b>Age at NS onset:</b> 5.0 ± 2.9 yrs<br><b>Age at MZR:</b> 8.1 ± 3.4 yrs<br><b>FU:</b> 12 mths after MZR start<br><b>Indications:</b> FRNS                                                                                                                              | <b>MZR:</b> 5 mg/kg/day (max. 150 mg) in a single dose<br><b>Duration:</b><br><b>Other:</b> oral steroids, ACEI/ARB                                                                                                                             | <b>RR:</b> fell from 3.7±1.3/yr to 0.8±0.8/yr (p<0.001)<br><b>Steroid dose:</b> decreased from 41.5 ± 15.8 to 6.6±10.1 mg/day (p<0.01)                                                                                                                                                                                                                        |

| 1 <sup>st</sup> author, year, [Ref.], country of origin | Title of Publication                                                                                                                             | Study design                        | Keywords                                                                              | N  | Population characteristics                                                                                                                                                                                                                                                                       | Treatment                                                                                                                                                                                                                                                                                                       | Outcomes                                                                                                                                                                                                                                                                                            |
|---------------------------------------------------------|--------------------------------------------------------------------------------------------------------------------------------------------------|-------------------------------------|---------------------------------------------------------------------------------------|----|--------------------------------------------------------------------------------------------------------------------------------------------------------------------------------------------------------------------------------------------------------------------------------------------------|-----------------------------------------------------------------------------------------------------------------------------------------------------------------------------------------------------------------------------------------------------------------------------------------------------------------|-----------------------------------------------------------------------------------------------------------------------------------------------------------------------------------------------------------------------------------------------------------------------------------------------------|
| Mizutani A, 2019 [159] Japan                            | Positive effects of single-daily high-dose mizoribine therapy after cyclophosphamide in young children with steroid-dependent nephrotic syndrome | Retrospective analysis              | Mizoribine<br>Cyclophosphamide<br>SDNS<br>Young children                              | 54 | <p><b>A: MZR after CPA:</b> n=36<br/><b>B: CPA only:</b> n=18</p> <p><b>Age at NS onset:</b> 3.4 (1.1-8.5) yrs (A), 4.6 (1.3-7.9) yrs (B)<br/><b>Age at CPA:</b> 5.9 (1.5-9.5) yrs (A), 5.6 (2.9-8.4) yrs (B)<br/><b>FU:</b> &gt; 2 yrs, 5.9 yrs<br/>43 M, 11 F<br/><b>Indications:</b> SDNS</p> | <p><b>A: MZR after CPA:</b><br/><b>CPA:</b> 2-2.5 mg/kg/day for 12 wks<br/>MZR: 5 mg/kg/day (max. 150 mg/d); 2-hr post-dose MZR level &gt;3 µg/ml<br/><b>Duration:</b> MZR 12 mths, then tapered off</p> <p><b>B: CPA only:</b> 2-2.5 mg/kg/day for 12 wks<br/><b>Other:</b> oral steroids in tapering dose</p> | <p><b>Sustained remission at 2 yrs:</b><br/>A: 21/36; B: 4/18 (58% vs. 22%, p&lt;0.05)<br/><b>Rate of regression to SDNS:</b><br/>9/36 (A), 7/18 (B) (6% vs. 39%, p&lt;0.05)<br/><b>RR:</b> not reported<br/><b>AE:</b> none</p>                                                                    |
| Kondoh T, 2019 [160] Japan                              | Assessment of factors associated with mizoribine responsiveness in children with steroid-dependent nephrotic syndrome                            | Retrospective analysis<br>2 centers | Mizoribine<br>Frequent-relapse nephrotic syndrome<br>Steroid-dependent NS<br>Children | 47 | <p><b>Age at NS onset:</b> 4.5 ± 2.4 yrs (responder)/ 5.4±3.4 yrsv (non-resp.)<br/><b>Age at MZR:</b> 7.4 ± 3.1 yrs/ 8.6± 4.8 yrs<br/><b>FU:</b><br/>43 M, 4 F<br/><b>Indications:</b> SDNS without prior treatment with steroid-sparing agents</p>                                              | <p><b>MZR:</b> 4 mg/kg twice a day (responder: 4.6 mg/kg, non-resp.: 4.9 mg/kg)<br/><b>Duration:</b><br/><b>Other:</b></p>                                                                                                                                                                                      | <p><b>Remission:</b><br/>MZR Responder: 16/47<br/>Non-responder: 31/47<br/><b>RR:</b> MZR-responder: decreased from 3.5/yr to 1.8/yr<br/>Non-resp.: 4.4/yr vs. 4.7/yr</p> <p>No differences in clinical characteristics and pharmacokinetics between resp./ non-resp.<br/><b>AE:</b> not stated</p> |

**Table S8.7: Other agents**

| 1 <sup>st</sup> author, year, country of origin | Title of Publication                                                             | Study design                                         | Keywords                                                                                                            | N                    | Population characteristics                                                                                                                                                                                                                                                                                                                     | Treatment                                                                                                                                                                           | Outcomes                                                                                                                                                                                                                                                                                                                                                                                                                                                                          |
|-------------------------------------------------|----------------------------------------------------------------------------------|------------------------------------------------------|---------------------------------------------------------------------------------------------------------------------|----------------------|------------------------------------------------------------------------------------------------------------------------------------------------------------------------------------------------------------------------------------------------------------------------------------------------------------------------------------------------|-------------------------------------------------------------------------------------------------------------------------------------------------------------------------------------|-----------------------------------------------------------------------------------------------------------------------------------------------------------------------------------------------------------------------------------------------------------------------------------------------------------------------------------------------------------------------------------------------------------------------------------------------------------------------------------|
| <b>VINCRIStINE (VCR)</b>                        |                                                                                  |                                                      |                                                                                                                     |                      |                                                                                                                                                                                                                                                                                                                                                |                                                                                                                                                                                     |                                                                                                                                                                                                                                                                                                                                                                                                                                                                                   |
| Kausman 2005 [161] Australia                    | Vincristine treatment in steroid-dependent nephrotic syndrome                    |                                                      | Vincristine Nephrotic syndrome                                                                                      | 12                   | <p><b>Age at NS onset:</b> 3 (2.1-6.5) yrs</p> <p><b>Age at VCR:</b> 13.1 (9.9-14.4) yrs</p> <p><b>Duration of NS before VCR:</b> 8.2 (3.9-11.5) yrs</p> <p><b>FU:</b> 1.9 (1.2-4) yrs after VCR</p> <p><b>8 M, 4 F</b></p> <p><b>Indications:</b> SDNS despite prior CPA (all), CSA (10), LEV (2), steroid toxicity</p>                       | <p><b>VCR:</b> 1-1.5 mg/m<sup>2</sup> IV weekly for 4 wks, then monthly for 4 mths</p> <p><b>Duration:</b> 5 mths</p> <p><b>Other:</b> oral steroids, CsA</p>                       | <p><b>Remission:</b> good response with achieving remission 7/12, poor response with still in relapses 5/12</p> <p><b>Duration of remission:</b> 0.4 (0.3-2.0) yrs</p> <p><b>RR:</b> fell from 4.0 (2-4)/yr to 1.5 (0-2.9)/yr (p=0.004)</p> <p><b>Time to relapse:</b> 5 mths</p> <p><b>AE:</b> abdominal pain 2 (at 1.5 mg/m<sup>2</sup>, resolved with 1 mg/m<sup>2</sup>); extravasation burn with no long-term injury 1, alopecia 1.</p> <p>Constipation (no. not stated)</p> |
| Krishnan 2005 [162] UK                          | Is there a role for vincristine in nephrotic syndrome - letter to the editor     | Retrospective e chart review as letter to the editor | Vincristine Nephrotic syndrome                                                                                      | 17, of those 8 SDN S | <p><b>Age at NS onset:</b> 5.3 (1.2-14.4) yrs</p> <p><b>Age at VCR:</b> not stated</p> <p><b>FU:</b> 2 yrs after VCR</p> <p><b>11 M, 6 F</b></p> <p><b>Indication:</b> SDNS (n=8), SRNS (n=9); prior treatments CPA (12), LEV (4)</p>                                                                                                          | <p><b>VCR:</b> 1.5 mg/m<sup>2</sup> weekly for 8 weeks</p> <p><b>Duration:</b> 8 weeks</p> <p><b>Other:</b> low dose oral steroids</p>                                              | <p><b>Complete remission:</b> SDNS: 2/8 (within 2 and 5 mths) SRNS: 1/9 (within 2yrs of treatment)</p> <p><b>AE:</b> 4/17 jaw pain (3 requiring carbamazepine), 2/17 constipation, 1/17 seizure, 1/17 foot-drop lastin 6 mths</p>                                                                                                                                                                                                                                                 |
| <b>SAQUINAVIR</b>                               |                                                                                  |                                                      |                                                                                                                     |                      |                                                                                                                                                                                                                                                                                                                                                |                                                                                                                                                                                     |                                                                                                                                                                                                                                                                                                                                                                                                                                                                                   |
| Coppo 2012 [163] Italy                          | Saquinavir in steroid-dependent and -resistant nephrotic syndrome: a pilot study | Prospective pilot study 2 centers                    | Antiproteasome drugs; antiviral drugs; immunoproteasome; nuclear factor κB (NF-κB); treatment of nephrotic syndrome | 6                    | <p><b>Age at NS onset:</b> 13.5 (7-38) yrs</p> <p><b>Duration of NS before Saquinavir:</b> 6.3 (1.3-14.9) yrs</p> <p><b>FU:</b> 14.7 (6-68.7) mths after Saquinavor</p> <p><b>4 M, 2 F</b></p> <p><b>Indication:</b> SDNS (3 with secondary steroid resistance), prior treatments with MP Pulses, CPA, CSA/TAC, MMF, plasma exchange, RTX,</p> | <p><b>Saquinavir:</b> 30 mg/kg/d</p> <p><b>Duration:</b> at least 6 mths</p> <p><b>Other:</b> low doses of CNI (CSA 2mg/kg/d or TAC 0.01-0.06 mg/kg/d); small doses of steroids</p> | <p><b>Favourable effects:</b> 4/6 became infrequent relapsers, 1/6 frequent relapse with 63% <b>prednisone reduction</b> (from 25.3 to 8.3 mg/kg/mth, p=0.015)</p> <p><b>AE:</b> mild diarrhea 2</p>                                                                                                                                                                                                                                                                              |



| 1 <sup>st</sup> author, year, country of origin | Title of Publication                                                                                                 | Study design                          | Keywords                                                                            | N  | Population characteristics                                                                                                                                         | Treatment                                                                                                                                                                                                                  | Outcomes                                                                                                                                                                                                                                                                                                                                                                                |
|-------------------------------------------------|----------------------------------------------------------------------------------------------------------------------|---------------------------------------|-------------------------------------------------------------------------------------|----|--------------------------------------------------------------------------------------------------------------------------------------------------------------------|----------------------------------------------------------------------------------------------------------------------------------------------------------------------------------------------------------------------------|-----------------------------------------------------------------------------------------------------------------------------------------------------------------------------------------------------------------------------------------------------------------------------------------------------------------------------------------------------------------------------------------|
| <b>ACTH</b><br>Chakraborty 2020 [164]           | ACTH treatment for management of nephrotic syndrome: A systematic review and reappraisal                             | Systematic review                     | ACTH Nephrotic syndrome                                                             |    | ACTH: Toxicity of steroids/ other agents                                                                                                                           |                                                                                                                                                                                                                            |                                                                                                                                                                                                                                                                                                                                                                                         |
|                                                 |                                                                                                                      |                                       |                                                                                     |    | <b>FSGS (9 studies, 98 pts)</b><br>Madan 2016<br>Tumlin 2013<br>Hogan 2013<br>Alhamed 2019<br>Bomback 2011 and 2012<br>Filippone 2016<br>Berg 1999<br>Lorusso 2015 | <b>Acthar gel:</b> 40-80 units twice or three times a week for 4-6 mths<br><b>Or Synthetic ACTH:</b> 1 mg once a week for 12 mths                                                                                          | Studies in summary:<br><b>FSGS:</b><br>Compl. remission: 9/98 (9.2%)<br>Partial rem.: 33/98 (33.6%)<br>Some proteinuria reduction 6/98 (6.1%)<br><b>AE:</b> increased swelling/edema 7, hyperglycemia 3, weight gain 4, myalgia 1, muscle cramps 4, hypertension 5, rash 2, temporary increase in skin pigmentation 1, dyspepsia 2, mood alteration 4, early termination of treatment 2 |
|                                                 |                                                                                                                      |                                       |                                                                                     |    | <b>MCGN (7 studies, 14 pts)</b><br>Madan 2016<br>Filippone 2016<br>Bomback 2011 and 2012<br>Khashtir 2015<br>Berg and Armadotir 2004<br>Lorusso 2015               |                                                                                                                                                                                                                            | <b>MCGN:</b><br>Compl. Rem.: 8/14 (57.1%)<br>Partial rem.: 3/14 (21.4%)<br><b>AE:</b> none                                                                                                                                                                                                                                                                                              |
|                                                 |                                                                                                                      |                                       |                                                                                     |    | <b>MPGN (4 studies, 13 pts)</b><br>Berg and Armadotir 2004<br>Lorusso 2015<br>Bomback 2012<br>Madan 2016                                                           |                                                                                                                                                                                                                            | <b>MPGN:</b><br>Compl. Rem.: 7/13 (53.8%)<br>Partial rem.: 1/13 (7.7%)<br><b>AE:</b> early termination of treatment 1, otherwise none                                                                                                                                                                                                                                                   |
| <b>AZATHIOPRIN</b>                              |                                                                                                                      |                                       |                                                                                     |    |                                                                                                                                                                    |                                                                                                                                                                                                                            |                                                                                                                                                                                                                                                                                                                                                                                         |
| <b>CPA – CSA – MMF – LEV - AZA</b>              |                                                                                                                      |                                       |                                                                                     |    |                                                                                                                                                                    |                                                                                                                                                                                                                            |                                                                                                                                                                                                                                                                                                                                                                                         |
| Mustafa BH 2016 [101]<br>Egypt                  | Immunosuppressive therapy in children with steroid-resistant, frequently-relapsing, and steroid-dependent idiopathic | Retrospective review<br>Single center | Childhood Nephrotic Syndrome<br>Steroid Resistance<br>Steroid Dependence<br>Relapse | 79 | <b>CPA:</b> n=28<br><b>CSA:</b> n=6<br><b>MMF:</b> n=2<br><b>LEV:</b> n=40<br><b>AZA:</b> n=10<br><b>Age at NS onset:</b> 3.7 (1.3-10.5) yrs                       | <b>CPA:</b> 2-3 mg/kg/d orally for 8-12 wks or IV as monthly bolus of 500-750 mg/m <sup>2</sup> for 6 mths<br><b>CSA:</b> 4-6 mg/kg/d divided into 2 doses for at least 12 mths<br><b>MMF:</b> 1200 mg/m <sup>2</sup> /day | <b>Remission for 6 mths:</b><br><b>CPA:</b> 24/28 (85.7%)<br><b>CSA:</b> 5/6 (83.3%)<br><b>MMF:</b> 1/1 (50%)<br><b>LEV:</b> 22/40 (55%)<br><b>AZA:</b> 8/10 (80%)<br><b>AE</b> (not differentiated between                                                                                                                                                                             |

| 1 <sup>st</sup> author, year, country of origin | Title of Publication                           | Study design | Keywords               | N | Population characteristics                                                                                           | Treatment                                                                                                                                                                                                                                                                 | Outcomes                                                                                                                                                                                                                                                                                                                                                                                                  |
|-------------------------------------------------|------------------------------------------------|--------------|------------------------|---|----------------------------------------------------------------------------------------------------------------------|---------------------------------------------------------------------------------------------------------------------------------------------------------------------------------------------------------------------------------------------------------------------------|-----------------------------------------------------------------------------------------------------------------------------------------------------------------------------------------------------------------------------------------------------------------------------------------------------------------------------------------------------------------------------------------------------------|
|                                                 | nephrotic syndrome: a single center experience |              | immunosupp<br>ressants |   | <b>Age at medication:</b> not stated<br><b>FU:</b><br>44 M, 35 F<br><b>Indications:</b> SDNS/ FRNS, steroid toxicity | divided into doses<br><b>LEV:</b> 2-2.5 mg/kg/dose twice weekly for 6-24 mths<br><b>AZA:</b> 2 mg/kg/d for 8 wks.<br><br>Either given as 1 <sup>st</sup> or 2 <sup>nd</sup> line drug; some given in double- or triple-combination therapy<br><b>Other:</b> oral steroids | SDNS (n=79) and SRNS (n=51):<br>CPA: Leukopenia 15/63 (23.8%), hemorrhagic cystitis 2/63 (3.2%)<br>CSA: gym hyperplasia 8/31 (25.8%), hirsutism 7/31 (22.6%), nephrotoxicity 2/31 (6.4%), hypertension 2/31 (6.4%)<br>MMF: diarrhea 7/12 (58.4%), nausea 3/12 (25%), abdominal pain 1 (8.3%), cough 1/12 (8.3%)<br>LEV: none<br>AZA: Leukopenia 2/10, diarrhea 2/10, abdominal pain 2/10, arthralgia 1/10 |

**Table S9: Adverse effects and impact of alkylating agents on pubertal children**

Please note that these studies are difficult to interpret as varying doses (mostly higher than 168mg/kg) were used, and stratification according to pubertal staging is rather unclear.

High FSH and LH levels are taken as surrogate markers of germinal epithelial injury intended to reflect azoo / oligo-spermia in some of the studies. In other testicular biopsies are done, or sperm counts checked several years after treatment.

| Study                                | Disease                                                                                                                                                          | Cum. Dose                                                                                   | Effect                                                                                                                                                                                                                                                                                                                               |
|--------------------------------------|------------------------------------------------------------------------------------------------------------------------------------------------------------------|---------------------------------------------------------------------------------------------|--------------------------------------------------------------------------------------------------------------------------------------------------------------------------------------------------------------------------------------------------------------------------------------------------------------------------------------|
| Lentz 1977<br>[165]                  | MLNS, FSGS,<br>MGN, MGN, SLE<br><br>CP at ages:<br>PrePub 5 to 12<br>Pubertal 11-16<br>PostPub 13.5 to 17<br><br>Patients studied<br>after puberty<br>completion |                                                                                             | Data on boys only                                                                                                                                                                                                                                                                                                                    |
|                                      |                                                                                                                                                                  | High dose<br>>365mg/kg                                                                      | azoospermia:<br>2/2 PrePubertal<br>1/2 Pubertal<br>3/3 PostPubertal<br><br>"FSH and LH were normal in one patient in the high-dose group who had normal semen (Patient 15), and in one of the seven high dose patients with azoospermia (Patient 7)"                                                                                 |
|                                      |                                                                                                                                                                  | Low dose <<br>365mg/kg                                                                      | NO azoospermia<br>Oligospermia in:<br>1/2 PrePubertal<br>2/6 Pubertal (one with multiple cong anomalies)<br>1/1 PostPubertal<br><br>FSH and LH were normal in all low-dose patients, including those with oligospermia                                                                                                               |
| No gonadal injury at doses <168mg/kg |                                                                                                                                                                  |                                                                                             |                                                                                                                                                                                                                                                                                                                                      |
| Pennisi 1975<br>[166]                | INS<br><br>1.5 to 5.5 yrs after<br>CP                                                                                                                            | Most patients rcvd<br>>168mg/kg<br><br>One Pre-pub pt<br>dosed 168mg/kg<br>had normal Ts Bx | Boys: Pre or early Pubertal (16) : All had normal FSH, LH and Ts levels. Testicular bx was abnormal in 4/5<br><br>Boys: Pubertal (7) : 5 had increased FSH. Spermatogenesis was diminished in all 7, 1 had azoospermia.<br><br>Girls (11, 7 pre and 4 pubertal) :No evidence of gonadal dysfunction was detected in any of the girls |

|                        |                                                     |                                                                                        |                                                                                                                                                                                                                                                                         |
|------------------------|-----------------------------------------------------|----------------------------------------------------------------------------------------|-------------------------------------------------------------------------------------------------------------------------------------------------------------------------------------------------------------------------------------------------------------------------|
| Kirkland 1976<br>[167] | NS<br><br>Studied 8 months to 7 yrs after CP course | Total dose 1.6 to 25.5 gm                                                              | Males<br>PrePubertal (15) - no abnormalities of basal serum levels of LH, FSH<br><br>Pubertal (5) elevated mean basal values of gonadotropins with normal testosterone levels and elevated LH responses to LRF; the FSH responses to LRF were elevated in four patients |
| Penso 1974<br>[168]    | NS<br><br>Studied 1-4 years after CP                | total doses 70 to 860mg/kg<br><br>6/7 treated for >6 months<br>1/7 treated for 9 weeks | Age 11-18 years<br><br>4 PrePubertal, 3 Pubertal<br><br>5/7 were oligospermic or azoospermic                                                                                                                                                                            |

**Table S10 : Studies of long-term outcome of childhood-onset SSNS**

| Study                 | No (M:F)      | Country     | Selection    | Diagnosis years | FU duration (yrs)    | Relapse adulthood                  | Risk factors                    | ESRD (n) |
|-----------------------|---------------|-------------|--------------|-----------------|----------------------|------------------------------------|---------------------------------|----------|
| Trompeter 1985 [169]  | 152 (108:44)  | UK          | Bx MCNS      | 1963-1969       | 21.3 (14-32)         | 6.8%                               | Onset age < 6 years             | 0        |
| Lewis 1989 [170]      | 45 (>16 yrs)  | UK          | Bx MCNS      | 1963-1976       | 14 (10-21)           | 19.2 (>20yo)<br>-26.7 (>16yo)<br>% | none                            | 0        |
| Takeichi 1997 [171]   | 34 (24:10)    | Japan       | Bx MCNS      | NA              | >6                   | 26%                                | Not analyzed                    | 1        |
| Fakhouri 2003 [172]   | 102           | France      | SSNS         | NA              | NA                   | 42.2% > puberty                    | No. of relapse during childhood | 0        |
| Ruth 2005 [173]       | 42            | Swiss       | SSNS         | 1970-2003       | 22.0 (2.9-39)        | 33%                                | Use of CsA                      | 0        |
| Kyrieleis 2007 [95]   | 93 (adult 15) | Netherlands | CPM, Bx MCNS | 1971-2003       | 8 (1-39)             | 29% after CPM (adult ??)           | Onset age < 3 years             | 0        |
| Skrzypczyk 2014 [174] | 55            | Poland      | SSNS         | 1970 - 2010     | 6 -38                | 16.4%                              | No. of relapse during childhood |          |
| Korsgaard 2019 [175]  | 39            | Denmark     | SSNS         | 1998-2015       | mean 14.4 (7.8–19.3) | 31%                                | SD/FR                           | 0        |
| Aydin 2019 [176]      | 43            | Germany     | SSNS         | 1957-1995       | 33.6 (14.4–50.8)     | 9.3%                               | Not relevant                    | 0        |
| Carter (2020) [177]   | 301           | Canada      | INS          | 1993 – 2016     | 3.9 (IQR 2.1-6.6)    | 22.3%                              | Not relevant                    | 1.2%     |

**Table S11:** Semiquantitative expression of typical dipstick results (van der Watt, Ped Neph 7th ed. 2016)

| <b>Dipstick results</b> | <b>Proteinuria</b> |
|-------------------------|--------------------|
| <b>Negative</b>         | 0 to <15 mg/dl     |
| <b>Trace</b>            | 15 to <30 mg/dl    |
| <b>1+</b>               | 30 to <100 mg/dl   |
| <b>2+</b>               | 100 to <300 mg/dl  |
| <b>3+</b>               | 300 to <1000 mg/dl |
| <b>If 4+</b>            | >/=1000 mg/dl      |

**Table S12 Future Research Recommendations**

| <b>Topic</b>             | <b>Subtopic</b>                                         | <b>Research Question</b>                                                                                                                                                                                                                                                                                                                                                                                                                                                                                                          |
|--------------------------|---------------------------------------------------------|-----------------------------------------------------------------------------------------------------------------------------------------------------------------------------------------------------------------------------------------------------------------------------------------------------------------------------------------------------------------------------------------------------------------------------------------------------------------------------------------------------------------------------------|
| <b>1st episode of NS</b> | Treatment with PDN                                      | <p>Compare the effectiveness of treatment with oral PDN for 8 (4+4) weeks or shorter duration vs. 12 (6+6) weeks (daily/alternate daily PDN) in terms of outcomes such as time to first relapse, FRNS and SDNS</p> <p>Compare the effectiveness of initial treatment with 30 mg/m<sup>2</sup> (1 mg/kg) for 4 weeks &amp; alt day for 4 wks with 60 mg/m<sup>2</sup> (2 mg/kg) for 4 weeks &amp; alt day for 4 wks</p> <p>Determine if initial PDN duration &gt;12 weeks affects future disease course in very young children</p> |
|                          | PDN Dosing                                              | Evaluate the dosing of PDN by weight or BSA for outcomes of effectiveness such as inducing remission, time to first relapse, FRNS, SDNS and steroid toxicity                                                                                                                                                                                                                                                                                                                                                                      |
|                          | Steroid-sparing agents                                  | Assess combination therapy of PDN with a steroid-sparing agent at disease onset to determine effectiveness of reducing time to remission, increasing time to first relapse or development of FRNS or SDNS                                                                                                                                                                                                                                                                                                                         |
|                          | Pharmacology, Pharmacokinetics, Pharmacogenomics        | <p>Determine the mode of action of glucocorticoids and other immunosuppressive medications in SSNS</p> <p>Examine the pharmacokinetics of prednisone by age</p> <p>Determine the role of pharmacogenomics in guiding selection of dose and duration of prednisone, and second line immunosuppressive agents</p>                                                                                                                                                                                                                   |
|                          | Risk stratification                                     | Identify biomarkers or genetic risk haplotypes to stratify disease subgroups and to assist in selection of appropriate therapeutic agents                                                                                                                                                                                                                                                                                                                                                                                         |
| <b>Relapses</b>          | Treatment with PDN                                      | Determine the minimum dose and duration of PDN for treatment of steroid sensitive relapses in order to regain and maintain remission, reduce PDN exposure, toxicity, and improve quality of life                                                                                                                                                                                                                                                                                                                                  |
|                          | PDN Dosing                                              | Evaluate the effectiveness of dosing of prednisone by weight or BSA in inducing remission and reducing steroid toxicity                                                                                                                                                                                                                                                                                                                                                                                                           |
|                          | Low dose daily versus low-dose alternate day PDN dosing | Compare the efficacy and safety of low-dose daily versus low-dose alternate day PDN dosing as long-term maintenance treatment to prevent relapses.                                                                                                                                                                                                                                                                                                                                                                                |
|                          | Prevention of relapses                                  | <p>Optimize treatment protocols for SSNS after relapse according to clinical phenotypes addressing important demographic variables such as age, sex and ethnicity.</p> <p>Determine if administering PDN treatment at the start of an infection is effective to maintain remission and prevent</p>                                                                                                                                                                                                                                |

| Topic                 | Subtopic                               | Research Question                                                                                                                                                                                                                                                                                                                                                                                                                                                                                                                                                                                            |
|-----------------------|----------------------------------------|--------------------------------------------------------------------------------------------------------------------------------------------------------------------------------------------------------------------------------------------------------------------------------------------------------------------------------------------------------------------------------------------------------------------------------------------------------------------------------------------------------------------------------------------------------------------------------------------------------------|
|                       |                                        | relapse                                                                                                                                                                                                                                                                                                                                                                                                                                                                                                                                                                                                      |
|                       | Prevention of URTI associated relapses | Determine the effectiveness of short term escalation of immunosuppression for prevention of upper respiratory tract infection (URTI) associated relapses in IRNS, FRNS, SDNS<br>Determination of the risk of URTI-associated relapse for large cohorts of children to understand differences according to ethnicity, geography and disease course.                                                                                                                                                                                                                                                           |
|                       | Adrenal function                       | Evaluate prevalence and incidence of adrenal insufficiency in children with SSNS at different points in their disease history, in terms of both symptoms of adrenal insufficiency and its impact on risk of relapses.                                                                                                                                                                                                                                                                                                                                                                                        |
|                       | General impact of relapses             | Measure the pattern of relapses in different populations to better understand the incidence of complex relapses and the impact of relapses on quality of life and health economics.                                                                                                                                                                                                                                                                                                                                                                                                                          |
| <b>FRNS/<br/>SDNS</b> | Treatment with steroid-sparing agents  | Compare the efficacy of different immunosuppressive therapies in maintaining sustained remission and reducing the frequency of relapses in order to determine how and when the different immunosuppressive therapies should be used.<br><br>Perform a RCT assessing antiCD20 agents, such as obinutuzumab, belimumab, daratumumab in comparison to RTX or as adjunctive therapy to other steroid-sparing agents.                                                                                                                                                                                             |
|                       | Duration of treatment                  | Determine the optimal duration of therapies of LEV, MMF, CNI                                                                                                                                                                                                                                                                                                                                                                                                                                                                                                                                                 |
|                       | Levamisole - side effect               | Assess the risk of ANCA positive vasculitis                                                                                                                                                                                                                                                                                                                                                                                                                                                                                                                                                                  |
|                       | MMF - drug monitoring                  | Determine the utility and benefits of drug monitoring                                                                                                                                                                                                                                                                                                                                                                                                                                                                                                                                                        |
|                       | Rituximab - safety, dosing, monitoring | Determine the safety of therapy with RTX, specifically the risk of transient or sustained hypogammaglobulinemia, and other serious adverse effects<br><br>Determine the optimal RTX individual dose in children<br><br>Examine the efficacy of sequential administration of RTX in maintaining remission and safety in order to determine the optimal number and timing of RTX retreatment<br><br>Examine the immune phenotype of B-lymphocytes following rituximab induced remission and during relapse<br><br>Evaluate the importance of monitoring for RTX plasma levels and anti-chimeric RTX antibodies |



| <b>Topic</b>               | <b>Subtopic</b>  | <b>Research Question</b>                                                                                                |
|----------------------------|------------------|-------------------------------------------------------------------------------------------------------------------------|
| <b>Drug toxicity</b>       |                  | Devise validated objective scores to measure acute and chronic corticosteroid toxicity.                                 |
|                            |                  | Compare toxicity from corticosteroids and non-steroid immunosuppression to help guide changes in maintenance treatment. |
| <b>Genetics</b>            | Familial SSNS    | Examine the genetic basis of SSNS, focusing on families with steroid sensitive disease                                  |
| <b>Adjunctive measures</b> | Vaccination      | Determine the efficacy and safety of live attenuated vaccines in children on maintenance immunosuppressive therapy      |
|                            | Edema            | Determine the efficacy of albumin and/or diuretics in the management of severe edema                                    |
| <b>Health outcomes</b>     | Quality of life  | Assess the quality of life in all clinical trials as a patient centered endpoint                                        |
|                            | Long-term safety | Assess the cumulative risk of late side effects from NS immunosuppression therapy                                       |
|                            | Adult outcomes   | Assess the impact of childhood onset NS in adulthood                                                                    |

**Table S13: Competencies expected in a young adult at the time of transition**

- I understand my condition and can describe it to others
- I know my medications and what they are for
- I can make decisions for myself about my treatment
- I know what the adult clinic arrangements are and who will be reviewing me in clinic
- I know how to make my appointments
- I can make my own transport arrangements to get to the hospital for appointments
- I know who to call in a medical emergency
- I am able to talk about my worries concerning blood tests and other treatments
- I know the dietary advice that I have to follow and the importance of activity
- I have appropriate knowledge about sexual health matters
- I have discussed alcohol, smoking and drug issues

Adapted from [178]

**Table S14 : The Transition scale, a tool to monitor the progression in transition competence.**

The Transition Scale is a mechanism to assess and monitor progress in achieving the goals of transition: the ability for the adolescent/young adult to provide her/his own self-management and not be reliant on parental care.

|                              |
|------------------------------|
| Type (of illness)            |
| Rx                           |
| Adherence                    |
| Nutrition                    |
| Self-management skills       |
| Informed reproductive health |
| Trade/school                 |
| Insurance                    |
| Ongoing support              |
| New health care providers    |

The score is determined by a professional member of the renal unit who designates for the young person a subscore of 0-1 (0=no ability, 0.5 = partial ability, 1=desired ability) for each component. The total score can be used to monitor progress over time, and the subscores can be used to identify gaps that need to be addressed.

<https://www.readysteadygo.net/>

<https://www.readysteadygo.net/uploads/4/7/8/1/47810883/hello-to-childrens-services-ready-print-ready.pdf>

**Table S15: Definition differences between children and adults**

| Term                                        | Definition in children < 16 years                                                                                                                                                                                       | Changes during transition                                                                                                                                                                                                                                                                                                                                                                                                                                                                                                                                                                                                                                     |
|---------------------------------------------|-------------------------------------------------------------------------------------------------------------------------------------------------------------------------------------------------------------------------|---------------------------------------------------------------------------------------------------------------------------------------------------------------------------------------------------------------------------------------------------------------------------------------------------------------------------------------------------------------------------------------------------------------------------------------------------------------------------------------------------------------------------------------------------------------------------------------------------------------------------------------------------------------|
| Nephrotic syndrome                          | Nephrotic-range proteinuria and either hypoalbuminemia (serum albumin <30 g/L (< 3 g/dL)) or edema when serum albumin is not available                                                                                  | <p>Patients will be transferred to other hospitals, and must be made aware that laboratory assays differ between hospitals. Therefore, the values they are used to may change.</p> <p>In the new KDIGO guideline, a remark with respect to <b>differences between albumin assays</b> were made, with a bias of 5-7 g/L between BCG and BCP/immunometric methods</p> <p>In adults, 30g/l as cut off to define nephrotic syndrome and 3.5g/day of proteinuria (or &gt; 3g/10mmol creatinine) is used.</p>                                                                                                                                                       |
| Steroid sensitive nephrotic syndrome (SSNS) | Complete remission within 4 weeks of prednisone or prednisolone (PDN) at standard dose (60 mg/m <sup>2</sup> /day or 2 mg/kg/day, maximum 60 mg/day)                                                                    | <p>In adults, the usual dose to treat a nephrotic syndrome is 1 mg/kg/day, with a maximum of 80 mg.</p> <p>The adult nephrologists suggest to allow more than 1 mg/kg/day in patients 16-18 years, but to use a maximum dose of 80 mg. e.g a 17 year old boy of 80 kg should not receive 60 mg</p>                                                                                                                                                                                                                                                                                                                                                            |
| Relapse                                     | Urine dipstick ≥ 3+ (≥300 mg/dl) <u>or</u> UPCR ≥ 200 mg/mmol (≥ 2 mg/mg) on a spot urine sample on 3 consecutive days, with or without reappearance of edema in a child who had previously achieved complete remission | <p>Quantifying proteinuria in adults is preferred; fever and severe exercise can induce some proteinuria, and if there are no symptoms (no edema) a wait and see strategy is possible, hesitating to treat too early. This is especially relevant in patients with infrequent relapses. Not each episode of limited proteinuria should count as a serious and relevant relapse. Patients sometimes relapse in the period after steroid withdrawal, in such instance they can respond to a short course of steroids e.g 5 days 30 mg; such a relapse is considered as not serious and this should not be counted as relapse in the sense of defining FRNS.</p> |

| Term      | Definition in children < 16 years                                                                                                                                                                                                                                                                                                                                                                                                                                                                                                                                                 | Changes during transition                                                                                                                                                                                                                                                                                                                                                                                                                 |
|-----------|-----------------------------------------------------------------------------------------------------------------------------------------------------------------------------------------------------------------------------------------------------------------------------------------------------------------------------------------------------------------------------------------------------------------------------------------------------------------------------------------------------------------------------------------------------------------------------------|-------------------------------------------------------------------------------------------------------------------------------------------------------------------------------------------------------------------------------------------------------------------------------------------------------------------------------------------------------------------------------------------------------------------------------------------|
| Remission | <p><b>Complete remission:</b> UPCR (based on first morning void or 24 hour urine sample) <math>\leq</math> 20 mg/mmol (0.2 mg/mg) <u>or</u> <math>&lt;</math>100 mg/m<sup>2</sup> per day, respectively, <u>or</u> negative <u>or</u> trace dipstick on three or more consecutive days</p> <p><b>Partial remission:</b> UPCR (based on first morning void <u>or</u> 24 h urine sample) <math>&gt;</math> 20 but <math>&lt;</math> 200 mg/mmol (<math>&gt;</math>0.2 mg/mg but <math>&lt;</math>2 mg/mg) and serum albumin <math>\geq</math> 30 g/L (<math>\geq</math> 3 g/dL)</p> | <p>Patients with a longstanding history of treated nephrotic syndrome often develop persistent low grade proteinuria (micro-albuminuria). In experience of adult nephrologists this is not evidence of disease activity but rather reflects secondary FSGS as a result of podocyte loss incurred during the nephrotic episodes.</p> <p>Therefore, it is necessary to quantify albuminuria or proteinuria in the period of "remission"</p> |

Evaluation system for competence of the patient for transition is required. The consensus statement of IPNA and ISN presented such a system, TRxansition scale [178].

## REFERENCES:

1. Hahn D SS, Willis NS, Craig JC, Hodson EM (2020) Corticosteroid therapy for nephrotic syndrome in children. *The Cochrane database of systematic reviews* 2020(8):CD001533.
2. APN 1988. Short versus standard prednisone therapy for initial treatment of idiopathic nephrotic syndrome in children. *Arbeitsgemeinschaft für Pädiatrische Nephrologie. Lancet* 1988 1:380-383
3. Ekka BK, Bagga A, Srivastava RN (1997) Single- versus divided-dose prednisolone therapy for relapses of nephrotic syndrome. *Pediatr Nephrol* 11:597-599
4. Li X, Li Z, Cheng Z (1994) Treatment of children with simple nephrotic syndrom using prednisone once per day. *Acta Academiae Medicinae Hubei* 15:386-388
5. Borovitz Y, Alfandary H, Haskin O, Levi S, Kaz S, Davidovits M, Dagan A (2020) Lower prednisone dosing for steroid-sensitive nephrotic syndrome relapse: a prospective randomized pilot study. *Eur J Pediatr* 179:279-283
6. Sheikh S, Mishra K (2021) Low-dose versus conventional-dose prednisolone for nephrotic syndrome relapses: a randomized controlled non-inferiority trial. *Pediatr Nephrol* 10:3143-3150.
7. Kansal A MM, Yadav S (2019) Effectiveness of a low dose prednisolone regimen for treatment of relapses in children with SSNS (abstract no: IPN10471-84). *Pediatr Nephrol* 2019; 34(10):1871.
8. Yadav M, Sinha A, Khandelwal P, Hari P, Bagga A (2019) Efficacy of low-dose daily versus alternate-day prednisolone in frequently relapsing nephrotic syndrome: an open-label randomized controlled trial. *Pediatr Nephrol* 34:829-835
9. Raman V, Krishnamurthy S, Harichandrakumar KT (2016) Body weight-based prednisolone versus body surface area-based prednisolone regimen for induction of remission in children with nephrotic syndrome: a randomized, open-label, equivalence clinical trial. *Pediatr Nephrol* 31:595-604
10. Basu B, Bhattacharyya S, Barua S, Naskar A, Roy B (2020) Efficacy of body weight vs body surface area-based prednisolone regimen in nephrotic syndrome. *Clin Exp Nephrol* 24:622-629
11. Abeyagunawardena AS, Trompeter RS (2008) Increasing the dose of prednisolone during viral infections reduces the risk of relapse in nephrotic syndrome: a randomised controlled trial. *Arch Dis Child* 93:226-228
12. Gulati A, Sinha A, Sreenivas V, Math A, Hari P, Bagga A (2011) Daily Corticosteroids Reduce Infection-associated Relapses in Frequently Relapsing Nephrotic Syndrome: A Randomized Controlled Trial. *Clin J Am Soc Nephrol* 6:63-69
13. Mattoo TK, Mahmoud MA (2000) Increased maintenance corticosteroids during upper respiratory infection decrease the risk of relapse in nephrotic syndrome. *Nephron* 85:343-345
14. Christian MT, Webb NJA, Mehta S, Woolley RL, Afentou N, Frew E, Brettell EA, Khan AR, Milford DV, Bockenbauer D, Saleem MA, Hall AS, Koziell A, Maxwell H, Hegde S, Prajapati H, Gilbert RD, Jones C, McKeever K, Cook W, Ives N (2021) Evaluation of Daily Low-Dose Prednisolone During Upper Respiratory Tract Infection to Prevent Relapse in Children With Relapsing Steroid-Sensitive Nephrotic Syndrome: The PREDNOS 2 Randomized Clinical Trial. *JAMA pediatrics*. 2022 Mar 1;176(3):236-243
15. Gargiulo A, Massella L, Ruggiero B, Ravà L, Ciofi Degli Atti M, Materassi M, Lugani F, Benetti E, Morello W, Molino D, Mattozzi F, Pennesi M, Maringhini S, Pasini A, Gianoglio B, Pecoraro C, Montini G, Murer L, Ghiggeri GM, Romagnani P, Vivarelli M, Emma F (2021) Results of the PROPINE randomized controlled study suggest tapering of prednisone treatment for relapses of steroid sensitive nephrotic syndrome is not necessary in children. *Kidney Int* 99:475-483
16. Kainth D, Hari P, Sinha A, Pandey S, Bagga A (2021) Short-Duration Prednisolone in Children with Nephrotic Syndrome Relapse: A Noninferiority Randomized Controlled Trial. *Clin J Am Soc Nephrol* 16:225-232
17. Abeyagunawardena AS, Thalgahagoda RS, Dissanayake PV, Abeyagunawardena S, Illangasekera YA, Karunadasa UI, Trompeter RS (2017) Short courses of daily prednisolone during upper respiratory tract infections reduce relapse frequency in childhood nephrotic syndrome. *Pediatr Nephrol* 32:1377-1382
18. Moher D, Pham B, Jones A, Cook DJ, Jadad AR, Moher M, Tugwell P, Klassen TP (1998) Does quality of reports of randomised trials affect estimates of intervention efficacy reported in meta-analyses? *Lancet* 352:609-613

19. Schulz KF, Chalmers I, Hayes RJ, Altman DG (1995) Empirical evidence of bias. Dimensions of methodological quality associated with estimates of treatment effects in controlled trials. *JAMA* 273:408-412
20. Larkins NG, Liu ID, Willis NS, Craig JC, Hodson EM (2020) Non-corticosteroid immunosuppressive medications for steroid-sensitive nephrotic syndrome in children. *The Cochrane database of systematic reviews* 4:Cd002290
21. Ahn YH, Kim SH, Han KH, Choi HJ, Cho H, Lee JW, Shin JI, Cho MH, Lee JH, Park YS, Ha IS, Cheong HI, Kim SY, Lee SJ, Kang HG (2018) Efficacy and safety of rituximab in childhood-onset, difficult-to-treat nephrotic syndrome: A multicenter open-label trial in Korea. *Medicine* 97:e13157
22. Iijima K, Sako M, Nozu K, Mori R, Tuchida N, Kamei K, Miura K, Aya K, Nakanishi K, Ohtomo Y, Takahashi S, Tanaka R, Kaito H, Nakamura H, Ishikura K, Ito S, Ohashi Y (2014) Rituximab for childhood-onset, complicated, frequently relapsing nephrotic syndrome or steroid-dependent nephrotic syndrome: a multicentre, double-blind, randomised, placebo-controlled trial. *Lancet* 384:1273-1281
23. Boumediene A, Vachin P, Sendeyo K, Oniszczuk J, Zhang SY, Henique C, Pawlak A, Audard V, Ollero M, Guignon V, Sahali D (2018) NEPHRUTIX: A randomized, double-blind, placebo vs Rituximab-controlled trial assessing T-cell subset changes in Minimal Change Nephrotic Syndrome. *J Autoimmun* 88:91-102
24. Ravani P, Magnasco A, Edefonti A, Murer L, Rossi R, Ghio L, Benetti E, Scozzola F, Pasini A, Dallera N, Sica F, Belingheri M, Scolari F, Ghiggeri GM (2011) Short-Term Effects of Rituximab in Children with Steroid- and Calcineurin-Dependent Nephrotic Syndrome: A Randomized Controlled Trial. *Clin J Am Soc Nephrol* 6:1308-1315
25. Basu B, Sander A, Roy B, Preussler S, Barua S, Mahapatra TKS, Schaefer F (2018) Efficacy of Rituximab vs Tacrolimus in Pediatric Corticosteroid-Dependent Nephrotic Syndrome: A Randomized Clinical Trial. *JAMA Pediatr* 172:757-764
26. Ravani P, Rossi R, Bonanni A, Quinn RR, Sica F, Bodria M, Pasini A, Montini G, Edefonti A, Belingheri M, De Giovanni D, Barbano G, Degl'Innocenti L, Scolari F, Murer L, Reiser J, Fornoni A, Ghiggeri GM (2015) Rituximab in Children with Steroid-Dependent Nephrotic Syndrome: A Multicenter, Open-Label, Noninferiority, Randomized Controlled Trial. *J Am Soc Nephrol* 26:2259-2266
27. Ravani P, Lugani F, Pisani I, Bodria M, Piaggio G, Bartolomeo D, Prunotto M, Ghiggeri GM (2020) Rituximab for very low dose steroid-dependent nephrotic syndrome in children: a randomized controlled study. *Pediatr Nephrol* 35:1437-1444
28. Hoyer PF, Brodeh J (2006) Initial treatment of idiopathic nephrotic syndrome in children: prednisone versus prednisone plus cyclosporine A: a prospective, randomized trial. *J Am Soc Nephrol* 17:1151-1157
29. Niaudet P (1992) Comparison of cyclosporin and chlorambucil in the treatment of steroid-dependent idiopathic nephrotic syndrome: a multicentre randomized controlled trial. *The French Society of Paediatric Nephrology. Pediatr Nephrol* 6:1-3
30. Ponticelli C, Edefonti A, Ghio L, Rizzoni G, Rinaldi S, Gusmano R, Lama G, Zacchello G, Confalonieri R, Altieri P, et al. (1993) Cyclosporin versus cyclophosphamide for patients with steroid-dependent and frequently relapsing idiopathic nephrotic syndrome: a multicentre randomized controlled trial. *Nephrol Dial Transplant* 8:1326-1332
31. Ishikura K, Ikeda M, Hattori S, Yoshikawa N, Sasaki S, Iijima K, Nakanishi K, Yata N, Honda M (2008) Effective and safe treatment with cyclosporine in nephrotic children: a prospective, randomized multicenter trial. *Kidney Int* 73:1167-1173
32. Iijima K, Sako M, Oba MS, Ito S, Hataya H, Tanaka R, Ohwada Y, Kamei K, Ishikura K, Yata N, Nozu K, Honda M, Nakamura H, Nagata M, Ohashi Y, Nakanishi K, Yoshikawa N (2014) Cyclosporine C2 monitoring for the treatment of frequently relapsing nephrotic syndrome in children: a multicenter randomized phase II trial. *Pediatr Nephrol* 9:271-278
33. Dorresteijn EM, Kist-van Holthe JE, Levtchenko EN, Nauta J, Hop WC, van der Heijden AJ (2008) Mycophenolate mofetil versus cyclosporine for remission maintenance in nephrotic syndrome. *Pediatr Nephrol* 23:2013-2020
34. Gellermann J, Weber L, Pape L, Tönshoff B, Hoyer P, Querfeld U (2013) Mycophenolate mofetil versus cyclosporin A in children with frequently relapsing nephrotic syndrome. *J Am Soc Nephrol* 24:1689-1697
35. Sinha A, Puraswani M, Kalaivani M, Goyal P, Hari P, Bagga A (2019) Efficacy and safety of mycophenolate mofetil versus levamisole in frequently relapsing nephrotic syndrome: an open-label randomized controlled trial. *Kidney Int* 95:210-218

36. Abeyagunawardena A, Trompeter R (2006) Efficacy of levamisole as a single agent in maintaining remission in steroid dependant nephrotic syndrome. *Pediatr Nephrol* 21:1503
37. Al-Saran K, Mirza K, Al-Ghanam G, Abdelkarim M (2006) Experience with levamisole in frequently relapsing, steroid-dependent nephrotic syndrome. *Pediatr Nephrol* 21:201-205
38. Gruppen MP, Bouts AH, Jansen-van der Weide MC, Merkus MP, Zurowska A, Maternik M, Massella L, Emma F, Niaudet P, Cornelissen EAM, Schurmans T, Raes A, van de Walle J, van Dyck M, Gulati A, Bagga A, Davin JC (2018) A randomized clinical trial indicates that levamisole increases the time to relapse in children with steroid-sensitive idiopathic nephrotic syndrome. *Kidney Int* 93:510-518
39. Rashid H, Ahmed S, Fatima N, Khanam A (1996) Levamisole in the treatment of steroid dependent or frequent relapsing nephrotic syndrome in children. *Bangladesh Renal Journal* 15:6-8
40. Sural S, Pahari D, Mitra K, Bhattacharya S, Mondal S, Taraphder A (2001) Efficacy of levamisole compared to cyclophosphamide and steroid in frequently relapsing (FR) minimal change nephrotic syndrome (MCNS). *J Am Soc Nephrol* 12:126A
41. Weiss R (1993) Randomized double-blind placebo controlled, multi-center trial of levamisole for children with frequently relapsing/steroid dependent nephrotic syndrome. *J Am Soc Nephrol* 4:289
42. Donia AF, Ammar HM, El-Agroudy Ael B, Moustafa Fel H, Sobh MA (2005) Long-term results of two unconventional agents in steroid-dependent nephrotic children. *Pediatr Nephrol* 20:1420-1425
43. Alatas H, Wirya IG, Tambunan T, Himawan S (1978) Controlled trial of chlorambucil in frequently relapsing nephrotic syndrome in children (a preliminary report). *J Med Assoc Thai* 61 Suppl 1:222-228
44. Barratt TM, Soothill JF (1970) Controlled trial of cyclophosphamide in steroid-sensitive relapsing nephrotic syndrome of childhood. *Lancet* 2:479-482
45. Chiu J, McLaine PN, Drummond KN (1973) A controlled prospective study of cyclophosphamide in relapsing, corticosteroid-responsive, minimal-lesion nephrotic syndrome in childhood. *J Pediatr* 82:607-613
46. Grupe WE, Makker SP, Ingelfinger JR (1976) Chlorambucil treatment of frequently relapsing nephrotic syndrome. *N Engl J Med* 295:746-749
47. (1974) Prospective, controlled trial of cyclophosphamide therapy in children with nephrotic syndrome. Report of the International study of Kidney Disease in Children. *Lancet* 2:423-427
48. Prasad N, Gulati S, Sharma RK, Singh U, Ahmed M (2004) Pulse cyclophosphamide therapy in steroid-dependent nephrotic syndrome. *Pediatr Nephrol* 19:494-498
49. Abeyagunawardena ATRS (2006) Intravenous pulsed vs oral Cyclophosphamide therapy in steroid-dependent nephrotic syndrome (abstract no: COD.PP 54). *Pediatr Nephrol* 2006;21(10):1535.
50. *Nephrologie\* AfP* (1982) Effect of cytotoxic drugs in frequently relapsing nephrotic syndrome with and without steroid dependence. *N Engl J Med* 306:451-454
51. Abeyagunawardena A (2007) Intravenous pulsed cyclophosphamide versus vincristine therapy in steroid dependant nephrotic syndrome: a randomised controlled trial. *Pediatr Nephrol*. pp 1547-1547
52. Barratt T, Cameron J, Chantler C, Ogg C, Soothill J (1973) Comparative trial of 2 weeks and 8 weeks cyclophosphamide in steroid-sensitive relapsing nephrotic syndrome of childhood. *Arch Dis Child* 48:286-290
53. Ueda N, Kuno K, Ito S (1990) Eight and 12 week courses of cyclophosphamide in nephrotic syndrome. *Arch Dis Child* 65:1147-1150
54. McCrory WW, Shibuya M, Lu WH, Lewy JE (1973) Therapeutic and toxic effects observed with different dosage programs of cyclophosphamide in treatment of steroid-responsive but frequently relapsing nephrotic syndrome. *J Pediatr* 82:614-618
55. Baluarte HJ, Hiner L, Gruskin AB (1978) Chlorambucil dosage in frequently relapsing nephrotic syndrome: a controlled clinical trial. *J Pediatr* 92:295-298
56. Yoshioka K, Ohashi Y, Sakai T, Ito H, Yoshikawa N, Nakamura H, Tanizawa T, Wada H, Maki S (2000) A multicenter trial of mizoribine compared with placebo in children with frequently relapsing nephrotic syndrome. *Kidney Int* 58:317-324
57. Zhang B, Liu T, Wang W, Zhang X, Fan S, Liu Z, Liu Z, Wu X (2014) A prospective randomly controlled clinical trial on azithromycin therapy for induction treatment of children with nephrotic syndrome. *Eur J Pediatr* 173:509-515



58. Abramowicz M, Barnett HL, Edelmann CM, Jr., Greifer I, Kobayashi O, Arneil GC, Barron BA, Gordillo PG, Hallman N, Tiddens HA (1970) Controlled trial of azathioprine in children with nephrotic syndrome. A report for the international study of kidney disease in children. *Lancet* 1:959-961
59. Wang C-s, Travers C, McCracken C, Leong T, Gbadegesin R, Quiroga A, Benfield MR, Hidalgo G, Srivastava T, Lo M, Yadin O, Mathias R, Araya CE, Khalid M, Orjuela A, Zaritsky J, Al-Akash S, Kamel M, Greenbaum LA (2018) Adrenocorticotrophic Hormone for Childhood Nephrotic Syndrome. *Clin J Am Soc Nephrol* 13:1859-1865
60. Cerkauskiene R, Kaltenis P (2005) Comparative study of prednisolone alone and prednisolone plus fusidic acid in the treatment of children with steroid-responsive nephrotic syndrome. *Medicina* 41 Suppl 1:26-30
61. Uddin GM RM, Rahman MH, Roy RR, Begum A, Huque SS. (2016) Comparative efficacy of mycophenolate mofetil and cyclosporine in children with frequent relapse nephrotic syndrome [abstract]. *Pediatr Nephrol* 31:1852-1853
62. Kemper MJ, Kuwertz-Broeking E, Bulla M, Mueller-Wiefel DE, Neuhaus TJ (2004) Recurrence of severe steroid dependency in cyclosporin A-treated childhood idiopathic nephrotic syndrome. *Nephrol Dial Transplant* 19:1136-1141
63. Iyengar A, Karthik S, Kumar A, Biswas S, Phadke K (2006) Cyclosporine in steroid dependent and resistant childhood nephrotic syndrome. *Indian pediatrics* 43:14-19
64. El-Husseini A, El-Basuony F, Mahmoud I, Sheashaa H, Sabry A, Hassan R, Taha N, Hassan N, Sayed-Ahmad N, Sobh M (2005) Long-term effects of cyclosporine in children with idiopathic nephrotic syndrome: a single-centre experience. *Nephrol Dial Nephrol* 20:2433-2438
65. Rinaldi S, Sesto A, Barsotti P, Faraggiana T, Sera F, Rizzoni G (2005) Cyclosporine therapy monitored with abbreviated area under curve in nephrotic syndrome. *Pediatr Nephrol* 20:25-29
66. Mahmoud I, Basuni F, Sabry A, El-Husseini A, Hassan N, Ahmad NS, Elbaz M, Moustafa F, Sobh M (2005) Single-centre experience with cyclosporin in 106 children with idiopathic focal segmental glomerulosclerosis. *Nephrol Dial Transplant* 20:735-742
67. Wasilewska A, Zoch-Zwierz W, Tomaszewska B, Tenderenda E (2005) [The effect of cyclosporine A in steroid-dependent nephrotic syndrome in children]. *Polski merkuriusz lekarski : organ Polskiego Towarzystwa Lekarskiego* 18:168-172
68. El-Husseini A, El-Basuony F, Mahmoud I, Donia A, Sheashaa H, Sabry A, Hassan N, Sayed-Ahmad N, Sobh M (2006) Impact of the cyclosporine-ketoconazole interaction in children with steroid-dependent idiopathic nephrotic syndrome. *Eur J Clin Pharmacol* 62:3-8
69. Sinha MD, MacLeod R, Rigby E, Clark AGB (2006) Treatment of severe steroid-dependent nephrotic syndrome (SDNS) in children with tacrolimus. *Nephrol Dial Nephrol* 21:1848-1854
70. Sheashaa H, Mahmoud I, El-Basuony F, El-Husseini A, Hassan N, El-Baz M, Ahmed NS, Sobh M (2007) Does cyclosporine achieve a real advantage for treatment of idiopathic nephrotic syndrome in children? A long-term efficacy and safety study. *Int Urol Nephrol* 39:923-928
71. Kranz B, Vester U, Büscher R, Wingen AM, Hoyer PF (2008) Cyclosporine-A-induced nephrotoxicity in children with minimal-change nephrotic syndrome: long-term treatment up to 10 years. *Pediatr Nephrol* 23:581-586
72. Kengne-Wafo S, Massella L, Diomedi-Camassei F, Gianviti A, Vivarelli M, Greco M, Stringini GR, Emma F (2009) Risk factors for cyclosporin A nephrotoxicity in children with steroid-dependant nephrotic syndrome. *Clin J Am Soc Nephrol* 4:1409-1416
73. Leroy V, Baudouin V, Alberti C, Guest G, Niaudet P, Loirat C, Deschenes G, Czernichow P, Simon D (2009) Growth in boys with idiopathic nephrotic syndrome on long-term cyclosporin and steroid treatment. *Pediatr Nephrol* 24:2393-2400
74. Suzuki K, Oki E, Tsuruga K, Aizawa-Yashiro T, Ito E, Tanaka H (2010) Benefits of once-daily administration of cyclosporine a for children with steroid-dependent, relapsing nephrotic syndrome. *Tohoku J Exp Med* 220:183-186
75. Ishikura K, Yoshikawa N, Hattori S, Sasaki S, Iijima K, Nakanishi K, Matsuyama T, Yata N, Ando T, Honda M (2010) Treatment with microemulsified cyclosporine in children with frequently relapsing nephrotic syndrome. *Nephrol Dial Nephrol* 25:3956-3962
76. Ishikura K, Yoshikawa N, Nakazato H, Sasaki S, Iijima K, Nakanishi K, Matsuyama T, Ito S, Yata N, Ando T, Honda M (2012) Two-Year Follow-Up of a Prospective Clinical Trial of Cyclosporine for Frequently Relapsing Nephrotic Syndrome in Children. *Clin J Am Soc Nephrol* 7:1576-1583

77. Wang W, Xia Y, Mao J, Chen Y, Wang D, Shen H, Fu H, Du L, Liu A (2012) Treatment of tacrolimus or cyclosporine A in children with idiopathic nephrotic syndrome. *Pediatr Nephrol* 27:2073-2079
78. Supavekin S, Surapaitoolkorn W, Kurupong T, Chaiyapak T, Piyaphanee N, Pattaragarn A, Sumboonnanda A (2013) Tacrolimus in steroid resistant and steroid dependent childhood nephrotic syndrome. *J Med Assoc Thai* 96:33-40
79. Bock ME, Cohn RA, Ali FN (2013) Treatment of childhood nephrotic syndrome with long-term, low-dose tacrolimus. *Clin Nephrol* 79:432-438
80. Hamasaki Y, Komaki F, Ishikura K, Hamada R, Sakai T, Hataya H, Ogata K, Ando T, Honda M (2017) Nephrotoxicity in children with frequently relapsing nephrotic syndrome receiving long-term cyclosporine treatment. *Pediatr Nephrol* 32:1383-1390
81. Kuroyanagi Y, Gotoh Y, Kasahara K, Nagano C, Fujita N, Yamakawa S, Yamamoto M, Takeda A, Uemura O (2018) Effectiveness and nephrotoxicity of a 2-year medium dose of cyclosporine in pediatric patients with steroid-dependent nephrotic syndrome: determination of the need for follow-up kidney biopsy. *Clin Exp Nephrol* 22:413-419
82. Yang EM, Lee ST, Choi HJ, Cho HY, Lee JH, Kang HG, Park YS, Cheong HI, Ha IS (2016) Tacrolimus for children with refractory nephrotic syndrome: a one-year prospective, multicenter, and open-label study of Tacrobell®, a generic formula. *World J Pediatr* 12:60-65
83. Delbet JD, Aoun B, Buob D, Degheili J, Brocheriou I, Ulinski T (2019) Infrequent tacrolimus-induced nephrotoxicity in French patients with steroid-dependent nephrotic syndrome. *Pediatr Nephrol* 34:2605-2608
84. Fujinaga S, Nishino T, Urushihara Y (2021) Efficacy of once-daily cyclosporine in Japanese children with steroid-dependent minimal change nephrotic syndrome. *Clin Exp Nephrol* 25:213-214
85. Wang J, Mao J, Chen J, Fu H, Shen H, Zhu X, Liu A, Shu Q, Du L (2016) Evaluation of mycophenolate mofetil or tacrolimus in children with steroid sensitive but frequently relapsing or steroid-dependent nephrotic syndrome. *Nephrology (Carlton, Vic)* 21:21-27
86. Fujinaga S, Someya T, Watanabe T, Ito A, Ohtomo Y, Shimizu T, Kaneko K (2013) Cyclosporine versus mycophenolate mofetil for maintenance of remission of steroid-dependent nephrotic syndrome after a single infusion of rituximab. *Eur J Pediatr* 172:513-518
87. Fujinaga S, Sakuraya K, Yamada A, Urushihara Y, Ohtomo Y, Shimizu T (2015) Positive role of rituximab in switching from cyclosporine to mycophenolate mofetil for children with high-dose steroid-dependent nephrotic syndrome. *Pediatr Nephrol* 30:687-691
88. Sumegi V, Haszon I, Bereczki C, Papp F, Turi S (2008) Long-term follow-up after cyclophosphamide and cyclosporine-A therapy in steroid-dependent and -resistant nephrotic syndrome. *Pediatr Nephrol* 23:1085-1092
89. Abeyagunawardena AS, Dillon MJ, Rees L, van't Hoff W, Trompeter RS (2003) The use of steroid-sparing agents in steroid-sensitive nephrotic syndrome. *Pediatr Nephrol* 18:919-924
90. Chen SY, Wu CY, Tsai IJ, Tsau YK (2010) Treatment course of steroid-dependent nephrotic syndrome: emphasized on treatment effect. *Nephrology (Carlton, Vic)* 15:336-339
91. Basu B, Babu BG, Mahapatra TK (2017) Long-term efficacy and safety of common steroid-sparing agents in idiopathic nephrotic children. *Clin Exp Nephrol* 21:143-151
92. Moorani KN, Hotchandani HM, Zubair AM, Lohana NC, Veerwani NR (2019) Immunosuppressive therapy in children with primary nephrotic syndrome: single center experience, Karachi, Pakistan. *BMC Nephrol* 20:239
93. Latta K, von Schnakenburg C, Ehrich JH (2001) A meta-analysis of cytotoxic treatment for frequently relapsing nephrotic syndrome in children. *Pediatr Nephrol* 16:271-282
94. Vester U, Kranz B, Zimmermann S, Hoyer PF (2003) Cyclophosphamide in steroid-sensitive nephrotic syndrome: outcome and outlook. *Pediatr Nephrol* 18:661-664
95. Kyrieleis HAC, Levchenko EN, Wetzels JFM (2007) Long-Term Outcome After Cyclophosphamide Treatment in Children With Steroid-Dependent and Frequently Relapsing Minimal Change Nephrotic Syndrome. *Am J Kidney Dis* 49:592-597
96. Azib S, Macher MA, Kwon T, Dechartres A, Alberti C, Loirat C, Deschênes G, Baudouin V (2011) Cyclophosphamide in steroid-dependent nephrotic syndrome. *Pediatr Nephrol* 26:927-932
97. Zagury A, de Oliveira AL, de Moraes CA, de Araujo Montalvão JA, Novaes RH, de Sá VM, Monteiro de Carvalho Dde B, Matuck T (2011) Long-term follow-up after cyclophosphamide therapy in steroid-dependent nephrotic syndrome. *Pediatr Nephrol* 26:915-920
98. Cammas B, Harambat J, Bertholet-Thomas A, Bouissou F, Morin D, Guignonis V, Bendeddouche S, Afroukh-Hacini N, Cochat P, Llanas B, Decramer S, Ranchin B (2010)

- Long-term effects of cyclophosphamide therapy in steroid-dependent or frequently relapsing idiopathic nephrotic syndrome. *Nephrol Dial Nephrol* 26:178-184
99. Bajeer IA, Khatri S, Tresa V, Hashmi S, Mubarak M, Lanewala AA (2018) Histopathological Spectrum and Short-Term Outcome of Treatment with Cyclophosphamide in Relapsing Steroid-Sensitive Nephrotic Syndrome. *J Coll Physicians Surg Pak* 28:436-439
  100. Alsaran K, Grisaru S, Stephens D, Arbus G (2001) Levamisole vs. cyclophosphamide for frequently-relapsing steroid-dependent nephrotic syndrome. *Clin Nephrol* 56:289-294
  101. Moustafa BH, Tolba OA (2016) Immunosuppressive therapy in children with steroid-resistant, frequently-relapsing, and steroid-dependent idiopathic nephrotic syndrome: a single center experience. *Electronic Physician* 8:2039-2047
  102. Bagga A, Hari P, Moudgil A, Jordan SC (2003) Mycophenolate mofetil and prednisolone therapy in children with steroid-dependent nephrotic syndrome. *Am J Kidney Dis* 42:1114-1120
  103. Novak I, Frank R, Vento S, Vergara M, Gauthier B, Trachtman H (2005) Efficacy of mycophenolate mofetil in pediatric patients with steroid-dependent nephrotic syndrome. *Pediatr Nephrol* 20:1265-1268
  104. Mendizabal S, Zamora I, Berbel O, Sanahuja MJ, Fuentes J, Simon J (2005) Mycophenolate mofetil in steroid/cyclosporine-dependent/resistant nephrotic syndrome. *Pediatr Nephrol* 20:914-919
  105. Hogg RJ, Fitzgibbons L, Bruick J, Bunke M, Ault B, Baqi N, Trachtman H, Swinford R (2006) Mycophenolate mofetil in children with frequently relapsing nephrotic syndrome: a report from the Southwest Pediatric Nephrology Study Group. *Clin J Am Soc Nephrol* 1:1173-1178
  106. Afzal K, Bagga A, Menon S, Hari P, Jordan SC (2007) Treatment with mycophenolate mofetil and prednisolone for steroid-dependent nephrotic syndrome. *Pediatr Nephrol* 22:2059-2065
  107. Fujinaga S, Ohtomo Y, Hirano D, Nishizaki N, Someya T, Ohtsuka Y, Kaneko K, Shimizu T (2009) Mycophenolate mofetil therapy for childhood-onset steroid dependent nephrotic syndrome after long-term cyclosporine: extended experience in a single center. *Clin Nephrol* 72:268-273
  108. Baudouin V, Alberti C, Lapeyraque AL, Bensman A, André JL, Broux F, Cailliez M, Decramer S, Niaudet P, Deschênes G, Jacqz-Aigrain E, Loirat C (2012) Mycophenolate mofetil for steroid-dependent nephrotic syndrome: a phase II Bayesian trial. *Pediatr Nephrol* 27:389-396
  109. Banerjee S, Pahari A, Sengupta J, Patnaik SK (2013) Outcome of severe steroid-dependent nephrotic syndrome treated with mycophenolate mofetil. *Pediatr Nephrol* 28:93-97
  110. Dehoux L, Hogan J, Dossier C, Fila M, Niel O, Maisin A, Macher MA, Kwon T, Baudouin V, Deschênes G (2016) Mycophenolate mofetil in steroid-dependent idiopathic nephrotic syndrome. *Pediatr Nephrol* 31:2095-2101
  111. Kapoor K, Saha A, Kaur M, Dubey NK, Upadhyay AD (2017) Mycophenolate Sodium for Children with Frequently Relapsing or Steroid Dependent Nephrotic Syndrome. *Indian Pediatr* 54:885-886
  112. Nandi M, Mandal SK, Samanta M, Majhi A, Das MK (2019) Efficacy of Mycophenolate Mofetil as a Remission Maintaining Agent in Idiopathic Childhood Nephrotic Syndrome. *Indian J Nephrol* 29:34-41
  113. Karunamoorthy S, Thanigachalam D, Jeyachandran D, Ramanathan S, Natarajan G, Thoppalan B (2020) The safety and efficacy of mycophenolate mofetil in children and adolescents with steroid-dependent nephrotic syndrome: a single-centre study. *Clin Kidney J* 13:179-183
  114. Fu LS, Chi CS (2000) Levamisole in steroid-sensitive nephrotic syndrome children with steroid-dependency and/or frequent relapses. *Acta Paediatr Taiwan* 41:80-84
  115. Alshaya HO, Kari JA (2002) Levamisole treatment in steroid sensitive nephrotic syndrome. *Saudi Med J* 23:1101-1104
  116. Donia AF, Amer GM, Ahmed HA, Gazareen SH, Moustafa FE, Shoeib AA, Ismail AM, Khamis S, Sobh MA (2002) Levamisole: adjunctive therapy in steroid dependent minimal change nephrotic children. *Pediatr Nephrol* 17:355-358
  117. Al-Ibrahim AA, Al-Kharraz SM, Al-Sadoon DM, Al-Madani AJ, Al-Musallam SA (2003) Levamisole Therapy as a Second-line Immunosuppressive Agent in Corticosteroid-sensitive Nephrotic Syndrome in Children. *Saudi J Kidney Dis Transplant* 14:153-157
  118. Sümegi V, Haszon I, Iványi B, Bereczki C, Papp F, Túri S (2004) Long-term effects of levamisole treatment in childhood nephrotic syndrome. *Pediatr Nephrol* 19:1354-1360

119. Fu LS, Shien CY, Chi CS (2004) Levamisole in steroid-sensitive nephrotic syndrome children with frequent relapses and/or steroid dependency: comparison of daily and every-other-day usage. *Nephron Clin Pract* 97:c137-141
120. Hafeez F, Ahmed TM, Samina U (2006) Levamisole in steroid dependent and frequently relapsing nephrotic syndrome. *J Coll Physicians Surg Pak* 16:35-37
121. Boyer O, Moulder JK, Grandin L, Somers MJ (2008) Short- and long-term efficacy of levamisole as adjunctive therapy in childhood nephrotic syndrome. *Pediatr Nephrol* 23:575-580
122. Madani A, Isfahani ST, Rahimzadeh N, Fereshtehnejad SM, Hoseini R, Moghtaderi M, Mohseni P, Ataiee N (2010) Effect of levamisole in steroid-dependent nephrotic syndrome. *Iran J Kidney Dis* 4:292-296
123. Elmas AT, Tabel Y, Elmas ON (2013) Short- and long-term efficacy of levamisole in children with steroid-sensitive nephrotic syndrome. *Int Urol Nephrol* 45:1047-1055
124. Ekambaram S, Mahalingam V, Nageswaran P, Udani A, Geminiganesan S, Priyadarshini S (2014) Efficacy of levamisole in children with frequently relapsing and steroid-dependent nephrotic syndrome. *Indian Pediatr* 51:371-373
125. Kuźma-Mroczkowska E, Skrzypczyk P, Pańczyk-Tomaszewska M (2016) Levamisole therapy in children with frequently relapsing and steroid-dependent nephrotic syndrome: a single-center experience. *Cent Eur J Immunol* 41:243-247
126. Abeyagunawardena AS, Karunadasa U, Jayaweera H, Thalgahagoda S, Tennakoon S, Abeyagunawardena S (2017) Efficacy of higher-dose levamisole in maintaining remission in steroid-dependant nephrotic syndrome. *Pediatr Nephrol* 32:1363-1367
127. Kiruba Samuel EM, Krishnamurthy S, Bhanudeep S, Muske S (2017) Levamisole in Frequently-relapsing and Steroid-dependent Nephrotic Syndrome. *Indian Pediatr* 54:831-834
128. Moorani KN, Zubair AM, Veerwani NR, Hotchandani HJ (2020) Efficacy of Levamisole in children with Frequent Relapsing and Steroid Dependent Nephrotic Syndrome at Tertiary Care Center-Karachi. *Pak J Med Sci* 36:1193-1198
129. Alsaran K, Mirza K, Al-Talhi A, Al-Kanani E (2017) Experience with second line drugs in frequently relapsing and steroid dependent childhood nephrotic syndrome in a large Saudi center. *Int Journal Pediatr Adolesc Med* 4:66-70
130. Kamei K, Ito S, Nozu K, Fujinaga S, Nakayama M, Sako M, Saito M, Yoneko M, Iijima K (2009) Single dose of rituximab for refractory steroid-dependent nephrotic syndrome in children. *Pediatr Nephrol* 24:1321-1328
131. Gulati A, Sinha A, Jordan SC, Hari P, Dinda AK, Sharma S, Srivastava RN, Moudgil A, Bagga A (2010) Efficacy and safety of treatment with rituximab for difficult steroid-resistant and -dependent nephrotic syndrome: multicentric report. *Clin J Am Soc Nephrol* 5:2207-2212
132. Prytula A, Iijima K, Kamei K, Geary D, Gottlich E, Majeed A, Taylor M, Marks SD, Tuchman S, Camilla R, Ognjanovic M, Filler G, Smith G, Tullus K (2010) Rituximab in refractory nephrotic syndrome. *Pediatr Nephrol* 25:461-468
133. Sellier-Leclerc AL, Macher MA, Loirat C, Guérin V, Watier H, Peuchmaur M, Baudouin V, Deschênes G (2010) Rituximab efficiency in children with steroid-dependent nephrotic syndrome. *Pediatr Nephrol* 25:1109-1115
134. Kemper MJ, Gellermann J, Habbig S, Krmar RT, Dittrich K, Jungraithmayr T, Pape L, Patzer L, Billing H, Weber L, Pohl M, Rosenthal K, Rosahl A, Mueller-Wiefel DE, Dötsch J (2012) Long-term follow-up after rituximab for steroid-dependent idiopathic nephrotic syndrome. *Nephrol Dial Transplant* 27:1910-1915
135. Tellier S, Brochard K, Garnier A, Bandin F, Llanas B, Guignonis V, Cailliez M, Pietrement C, Dunand O, Nathanson S, Bertholet-Thomas A, Ichay L, Decramer S (2013) Long-term outcome of children treated with rituximab for idiopathic nephrotic syndrome. *Pediatr Nephrol* 28:911-918
136. Ruggenti P, Ruggiero B, Cravedi P, Vivarelli M, Massella L, Marasà M, Chianca A, Rubis N, Ene-Iordache B, Rudnicki M, Pollastro RM, Capasso G, Pisani A, Pennesi M, Emma F, Remuzzi G (2014) Rituximab in steroid-dependent or frequently relapsing idiopathic nephrotic syndrome. *J Am Soc Nephrol* 25:850-863
137. Sun L, Xu H, Shen Q, Cao Q, Rao J, Liu HM, Fang XY, Zhou LJ (2014) Efficacy of rituximab therapy in children with refractory nephrotic syndrome: a prospective observational study in Shanghai. *World J Pediatr* 10:59-63
138. Kamei K, Ogura M, Sato M, Sako M, Iijima K, Ito S (2016) Risk factors for relapse and long-term outcome in steroid-dependent nephrotic syndrome treated with rituximab. *Pediatr Nephrol* 31:89-95

139. Fujinaga S, Hirano D, Mizutani A, Sakuraya K, Yamada A, Sakurai S, Shimizu T (2017) Predictors of relapse and long-term outcome in children with steroid-dependent nephrotic syndrome after rituximab treatment. *Clin Exp Nephrol* 21:671-676
140. Topaloglu R, Gulhan B, Celegen K, Inozu M, Hayran M, Duzova A, Ozaltin F (2019) Rituximab for Children With Difficult-to-Treat Nephrotic Syndrome: Its Effects on Disease Progression and Growth. *Front Pediatr* 7:313
141. Hogan J, Dossier C, Kwon T, Macher MA, Maisin A, Couderc A, Niel O, Baudouin V, Deschênes G (2019) Effect of different rituximab regimens on B cell depletion and time to relapse in children with steroid-dependent nephrotic syndrome. *Pediatr Nephrol* 34:253-259
142. Maxted AP, Dalrymple RA, Chisholm D, McColl J, Tse Y, Christian MT, Reynolds BC (2019) Low-dose rituximab is no less effective for nephrotic syndrome measured by 12-month outcome. *Pediatr Nephrol* 34:855-863
143. Takahashi T, Okamoto T (2019) Periodically repeated rituximab administrations in children with refractory nephrotic syndrome: 2-year multicenter observational study 34:87-96
144. Chan EY, Webb H, Yu E, Ghiggeri GM, Kemper MJ, Ma AL, Yamamura T, Sinha A, Bagga A, Hogan J, Dossier C, Vivarelli M, Liu ID, Kamei K, Ishikura K, Saini P, Tullus K (2020) Both the rituximab dose and maintenance immunosuppression in steroid-dependent/frequently-relapsing nephrotic syndrome have important effects on outcomes. *Kidney Int* 97:393-401
145. Sinha A, Bagga A, Gulati A, Hari P (2012) Short-term efficacy of rituximab versus tacrolimus in steroid-dependent nephrotic syndrome. *Pediatr Nephrol* 27:235-241
146. Webb H, Jaureguierry G, Dufek S, Tullus K, Bockenbauer D (2016) Cyclophosphamide and rituximab in frequently relapsing/steroid-dependent nephrotic syndrome. *Pediatr Nephrol* 31:589-594
147. Kari JA, Alhasan KA, Albanna AS, Safdar OY, Shalaby MA, Böckenbauer D, El-Desoky SM (2020) Rituximab versus cyclophosphamide as first steroid-sparing agent in childhood frequently relapsing and steroid-dependent nephrotic syndrome. *Pediatr Nephrol* 35:1445-1453
148. Delbe-Bertin L, Aoun B, Tudorache E, Lapillone H, Ulinski T (2013) Does rituximab induce hypogammaglobulinemia in patients with pediatric idiopathic nephrotic syndrome? *Pediatr Nephrol* 28:447-451
149. Delbet JD, Leclerc G, Ulinski T (2019) Idiopathic nephrotic syndrome and rituximab: may we predict circulating B lymphocytes recovery? *Pediatr Nephrol* 34:529-532
150. Colucci M, Carsetti R, Cascioli S, Casiraghi F, Perna A, Ravà L, Ruggiero B, Emma F, Vivarelli M (2016) B Cell Reconstitution after Rituximab Treatment in Idiopathic Nephrotic Syndrome. *J Am Soc Nephrol* 27:1811-1822
151. Colucci M, Carsetti R, Serafinelli J, Rocca S, Massella L, Gargiulo A, Lo Russo A, Capponi C, Cotugno N, Porzio O, Onetti Muda A, Palma P, Emma F, Vivarelli M (2019) Prolonged Impairment of Immunological Memory After Anti-CD20 Treatment in Pediatric Idiopathic Nephrotic Syndrome. *Front Immunol* 10:1653
152. Parmentier C, Delbet JD, Decramer S, Boyer O, Hogan J, Ulinski T (2020) Immunoglobulin serum levels in rituximab-treated patients with steroid-dependent nephrotic syndrome. *Pediatr Nephrol* 35:455-462
153. Fujinaga S, Ozawa K, Sakuraya K, Yamada A, Shimizu T (2016) Late-onset adverse events after a single dose of rituximab in children with complicated steroid-dependent nephrotic syndrome. *Clin Nephrol* 85:340-345
154. Maeda R, Kawasaki Y, Ohara S, Suyama K, Hosoya M (2018) Serum sickness with refractory nephrotic syndrome following treatment with rituximab. *CEN C Rep* 7:69-72
155. Ohtomo Y, Fujinaga S, Takada M, Murakami H, Akashi S, Shimizu T, Kaneko K, Yamashiro Y (2005) High-dose mizoribine therapy for childhood-onset frequently relapsing steroid-dependent nephrotic syndrome with cyclosporin nephrotoxicity. *Pediatr Nephrol* 20:1744-1749
156. Kawasaki Y, Hosoya M, Kobayashi S, Ohara S, Onishi N, Takahashi A, Isome M, Suzuki H (2005) Oral mizoribine pulse therapy for patients with steroid-resistant and frequently relapsing steroid-dependent nephrotic syndrome. *Nephrol Dial Transplant* 20:2243-2247
157. Fujinaga S, Hirano D, Nishizaki N, Someya T, Ohtomo Y, Ohtsuka Y, Shimizu T, Kaneko K (2011) Single daily high-dose mizoribine therapy for children with steroid-dependent nephrotic syndrome prior to cyclosporine administration. *Pediatr Nephrol* 26:479-483
158. Xia ZK, Gao YF, Rong LP, Dang XQ, Shen Q, Jiang XY, Yi ZW, Xu H (2019) Usefulness of mizoribine administration in children with frequently relapsing nephrotic syndrome, and the relationship between pharmacokinetic parameters and efficacy: a multicenter prospective cohort study in China. *World J Pediatr* 15:262-269.

159. Mizutani A, Fujinaga S (2019) Positive effects of single-daily high-dose mizoribine therapy after cyclophosphamide in young children with steroid-dependent nephrotic syndrome *Clin Exp Nephrol* 23:244-250
160. Kondoh T, Ikezumi Y (2019) Assessment of factors associated with mizoribine responsiveness in children with steroid-dependent nephrotic syndrome *Clin Exp Nephrol* 23:1154-1160
161. Kausman JY, Yin L, Jones CL, Johnstone L, Powell HR (2005) Vincristine treatment in steroid-dependent nephrotic syndrome. *Pediatr Nephrol* 20:1416-1419
162. Krishnan RG, Coulthard MG, Moghal NE (2006) Is there a role for vincristine in nephrotic syndrome? *Pediatr Nephrol* 21:597
163. Coppo R, Camilla R, Porcellini MG, Peruzzi L, Gianoglio B, Amore A, Dapra V, Loiacono E, Fonsato V, Dal Canton A, Esposito C, Esposito P, Tovo PA (2012) Saquinavir in steroid-dependent and -resistant nephrotic syndrome: a pilot study. *Nephrol Dial Transplant* 27:1902-1910
164. Chakraborty R, Mehta A, Nair N, Nemer L, Jain R, Joshi H, Raina R (2020) ACTH Treatment for Management of Nephrotic Syndrome: A Systematic Review and Reappraisal. *Int J Nephrol* 2020:2597079
165. Lentz RD, Bergstein J, Steffes MW, Brown DR, Prem K, Michael AF, Vernier RL (1977) Postpubertal evaluation of gonadal function following cyclophosphamide therapy before and during puberty. *J Pediatr* 91:385-394
166. Pennisi AJ, Grushkin CM, Lieberman E (1975) Gonadal function in children with nephrosis treated with cyclophosphamide. *Am J Dis Child* 129:315-318
167. Kirkland RT, Bongiovanni AM, Cornfield D, McCormick JB, Parks JS, Tenore A (1976) Gonadotropin responses to luteinizing releasing factor in boys treated with cyclophosphamide for nephrotic syndrome. *J Pediatr* 89:941-944
168. Penso J, Lippe B, Ehrlich R, Smith FG, Jr. (1974) Testicular function in prepubertal and pubertal male patients treated with cyclophosphamide for nephrotic syndrome. *J Pediatr* 84:831-836
169. Trompeter RS, Lloyd BW, Hicks J, White RH, Cameron JS (1985) Long-term outcome for children with minimal-change nephrotic syndrome. *Lancet* 1:368-370
170. Lewis MA, Baildom EM, Davies N, Houston IB, Postlethwaite RJ (1988) Steroid-sensitive minimal change nephrotic syndrome. Long-term follow-up. *Contrib Nephrol* 67:226-228
171. Takeichi S, Tazawa M, Morooka M, Minowa S, Yasaki T (1997) [Long-term follow-up study of children with minimal change nephrotic syndrome]. *Nihon Jinzo Gakkai Shi* 39:155-160
172. Fakhouri F, Bocquet N, Taupin P, Presne C, Gagnadoux MF, Landais P, Lesavre P, Chauveau D, Knebelmann B, Broyer M, Grünfeld JP, Niaudet P (2003) Steroid-sensitive nephrotic syndrome: from childhood to adulthood. *Am J Kidney Dis* 41:550-557
173. Rùth EM, Kemper MJ, Leumann EP, Laube GF, Neuhaus TJ (2005) Children with steroid-sensitive nephrotic syndrome come of age: long-term outcome. *J Pediatr* 147:202-207
174. Skrzypczyk P, Panczyk-Tomaszewska M, Roszkowska-Blaim M, Wawer Z, Bienias B, Zajgzkowska M, Kilis-Pstrusinska K, Jakubowska A, Szczepaniak M, Pawlak-Bratkowska M, Tkaczyk M (2014) Long-term outcomes in idiopathic nephrotic syndrome: from childhood to adulthood. *Clin Nephrol* 81:166-173
175. Korsgaard T, Andersen RF, Joshi S, Hagstrøm S, Rittig S (2019) Childhood onset steroid-sensitive nephrotic syndrome continues into adulthood. *Pediatr Nephrol* 34:641-648
176. Aydin M, Franke I, Kurylowicz L, Ganschow R, Lentze M, Born M, Hagemann R (2019) The long-term outcome of childhood nephrotic syndrome in Germany: a cross-sectional study. *Clin Exp Nephrol* 23:676-68.
177. Carter SA, Mistry S, Fitzpatrick J, Banh T, Hebert D, Langlois V, Pearl RJ, Chanchlani R, Licht CPB, Radhakrishnan S, Brooke J, Reddon M, Levin L, Aitken-Menezes K, Noone D, Parekh RS (2020) Prediction of Short- and Long-Term Outcomes in Childhood Nephrotic Syndrome. *Kidney Int Rep* 5:426-434
178. Watson AR, Harden P, Ferris M, Kerr PG, Mahan J, Ramzy MF (2011) Transition from pediatric to adult renal services: a consensus statement by the International Society of Nephrology (ISN) and the International Pediatric Nephrology Association (IPNA). *Pediatr Nephrol* 26:1753-1757.
